# Supplementary material
Source: PubMed Central journal article supplement (PMC4146577)
Supplement: NIHMS616022-supplement-Supplementary_data.pdf [file NIHMS616022-supplement-Supplementary_data.pdf]

## Supplemental Information

### **Tandem Mass Spectrometry of Heparan Sulfate Negative Ions: Sulfate Loss Patterns and Chemical Modification Methods for Improvement of Product Ion Profiles**

Xiaofeng Shi, Yu Huang, Yang Mao, Hicham Naimy and Joseph Zaia\*

Department of Biochemistry and Center for Biomedical Mass Spectrometry

Boston University School of Medicine

\*Please address correspondences to Dr. Joseph Zaia, [jzaia@bu.edu](mailto:jzaia@bu.edu), 670 Albany Street 5<sup>th</sup> floor, Boston, MA 02118

**Table S1.** Comparison of average charge state and FPI for oligosaccharides before and after chemical modification.

| Composition (native) | Average charge state | FPI of most abundant charge state | Composition (after modification) | Average charge state | Average charge State with sulfolane | FPI of most abundant charge state |
|----------------------|----------------------|-----------------------------------|----------------------------------|----------------------|-------------------------------------|-----------------------------------|
| [1,2,3,1,3]          | 2.38                 | 0.667                             | [1,2,3,3,1]-2d <sub>3</sub>      | 1.94                 | 1.96                                | 0.333                             |
| [1,2,3,1,4]          | 2.54                 | 0.833                             | [1,2,3,3,2]-2d <sub>3</sub>      | 2.04                 | 2.39                                | 0.500                             |
| [1,2,3,1,5]          | 2.82                 | 1.000                             | [1,2,3,3,3]-2d <sub>3</sub>      | 2.24                 | 2.92                                | 0.500                             |
| [1,3,4,1,4]          | 2.89                 | 0.750                             | [1,3,4,4,1]-3d <sub>3</sub>      | 2.00                 | 2.00                                | 0.375                             |
| [1,3,4,1,5]          | 3.07                 | 0.875                             | [1,3,4,4,2]-3d <sub>3</sub>      | 2.19                 | 2.64                                | 0.375                             |
| [1,3,4,1,6]          | 3.14                 | 0.625                             | [1,3,4,4,3]-3d <sub>3</sub>      | 2.29                 | 2.93                                | 0.500                             |
| [1,3,4,1,7]          | 3.27                 | 0.875                             | [1,3,4,4,4]-3d <sub>3</sub>      | 2.56                 | 3.57                                | 0.500                             |
| [1,3,4,1,8]          | 3.28                 | 1.000                             | [1,3,4,4,5]-3d <sub>3</sub>      | 3.25                 | 4.12                                | 0.625                             |
| [1,3,4,2,3]          | 2.45                 | 0.625                             | [1,3,4,4,1]-2d <sub>3</sub>      | 2.00                 | 2.00                                | 0.375                             |
| [1,3,4,2,4]          | 2.61                 | 0.625                             | [1,3,4,4,2]-2d <sub>3</sub>      | 2.17                 | 2.65                                | 0.375                             |
| [1,3,4,2,5]          | 2.84                 | 0.750                             | [1,3,4,4,3]-2d <sub>3</sub>      | 2.29                 | 2.86                                | 0.500                             |
| [1,3,4,2,6]          | 3.14                 | 0.875                             | [1,3,4,4,4]-2d <sub>3</sub>      | 2.63                 | 3.57                                | 0.500                             |
| [1,3,4,2,7]          | 3.48                 | 1.000                             | [1,3,4,4,5]-2d <sub>3</sub>      | 3.00                 | 4.19                                | 0.625                             |

Figure S1. CID behavior of singly, doubly, and sodium-adducted precursor ions of D2SO.

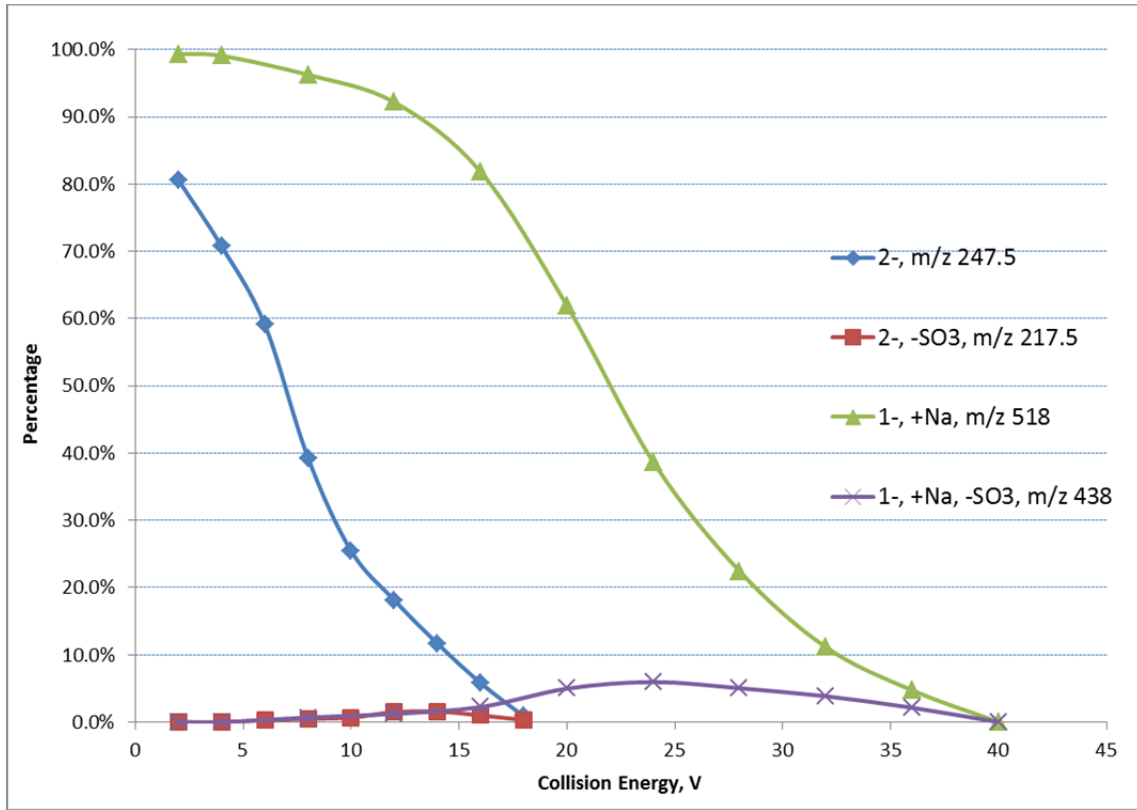

**Figure S2.** The energy of  $\text{CH}_3\text{OSO}_3\text{H}$  when the O-S bond is fixed at different lengths by ModRedundant calculation. The energy for the species that has the O-S bond length of 6 Å and beyond was treated as the products are separated to infinite distance. The red curve is a fitting in Igor Pro.

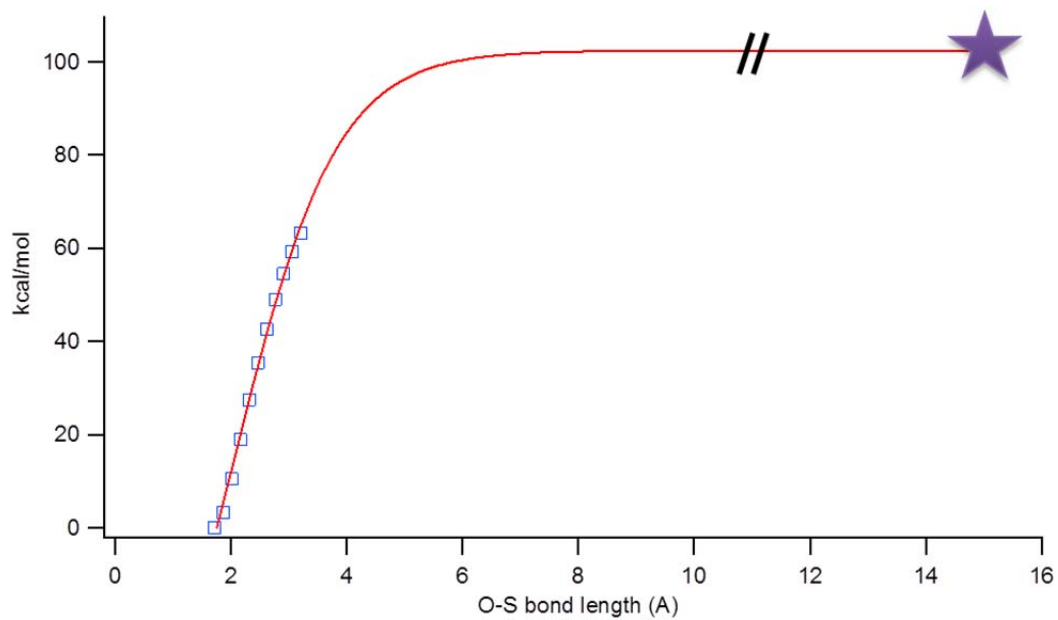

**Figure S3.** CID behaviors of singly charged precursor ions of D0S0 and D0A6.

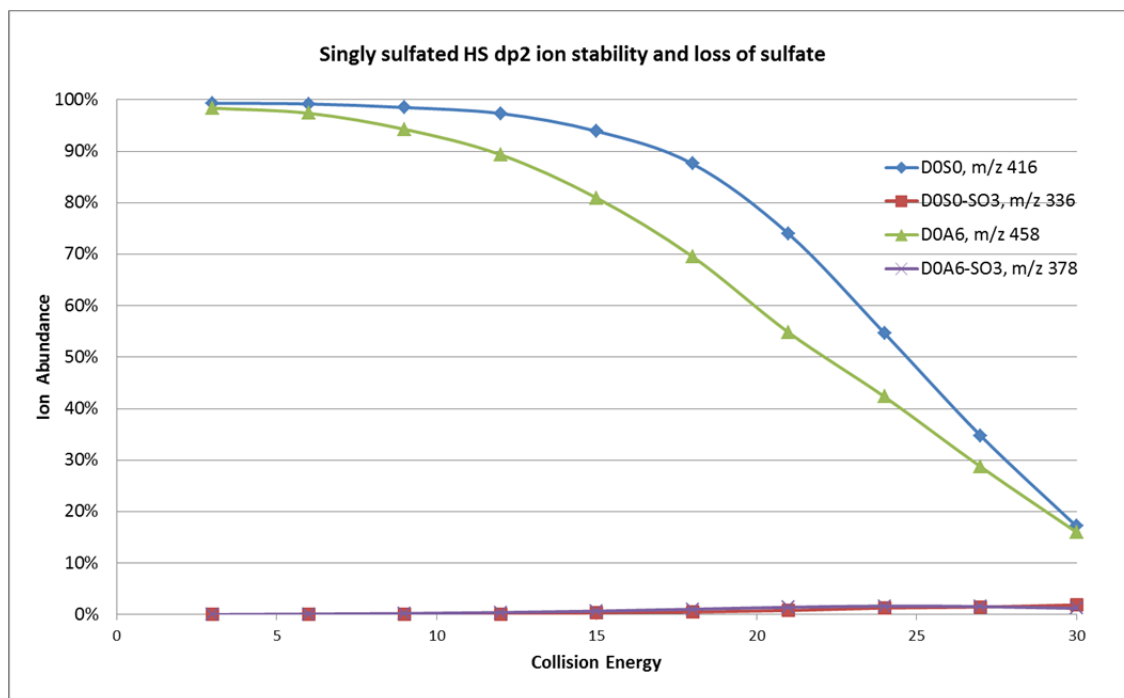

**Figure S4.** (A) Reaction schemes of E and F and equilibrium between them. (B) Simulated product distribution of N- and O-sulfate loss at 600 K. (C) Simulated product distribution of N- and O-sulfate loss at 1000 K.

(A)

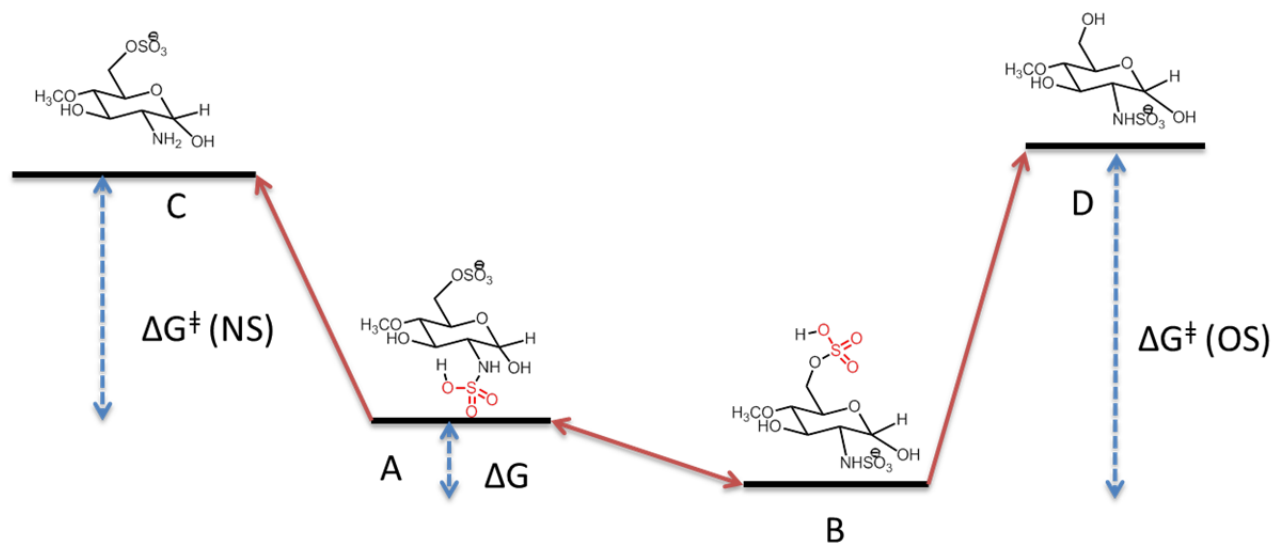

(B)

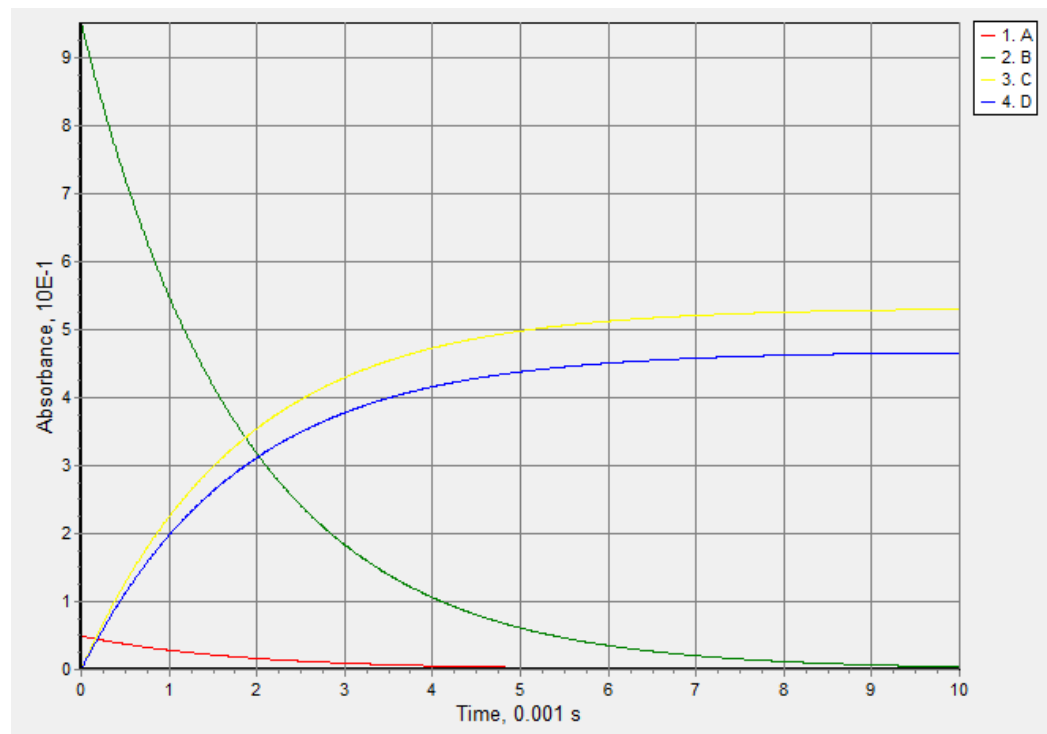

(C)

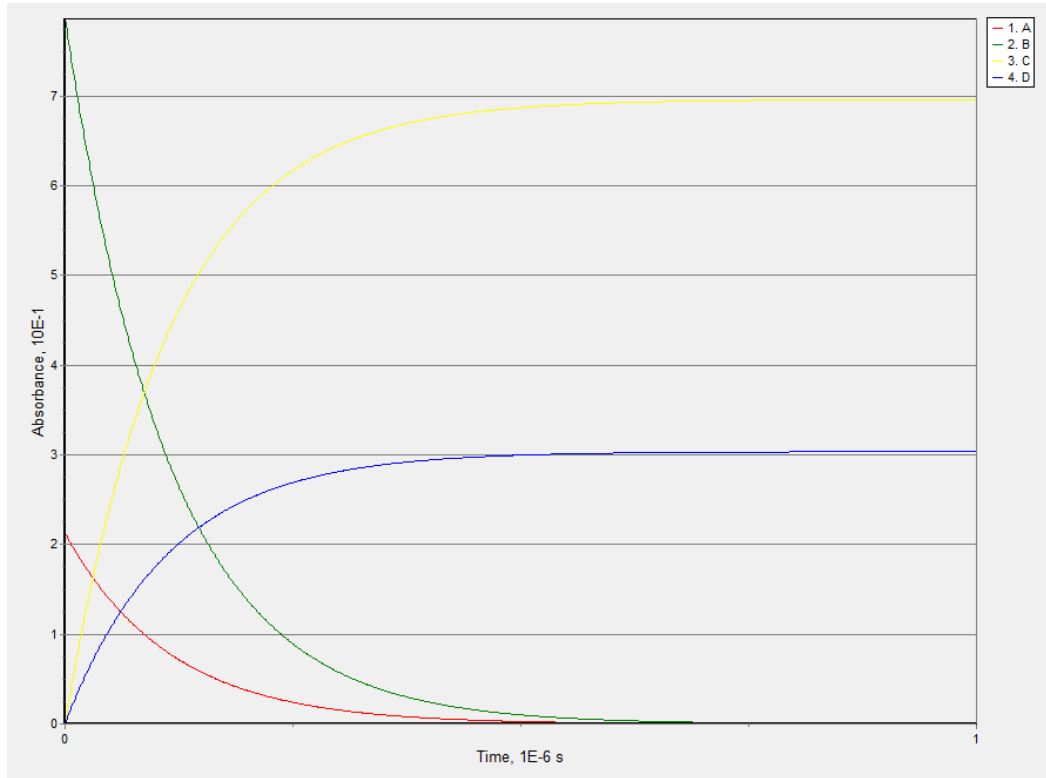

**Figure S5.** Product distribution of dp6 and dp8's before and after chemical modification.

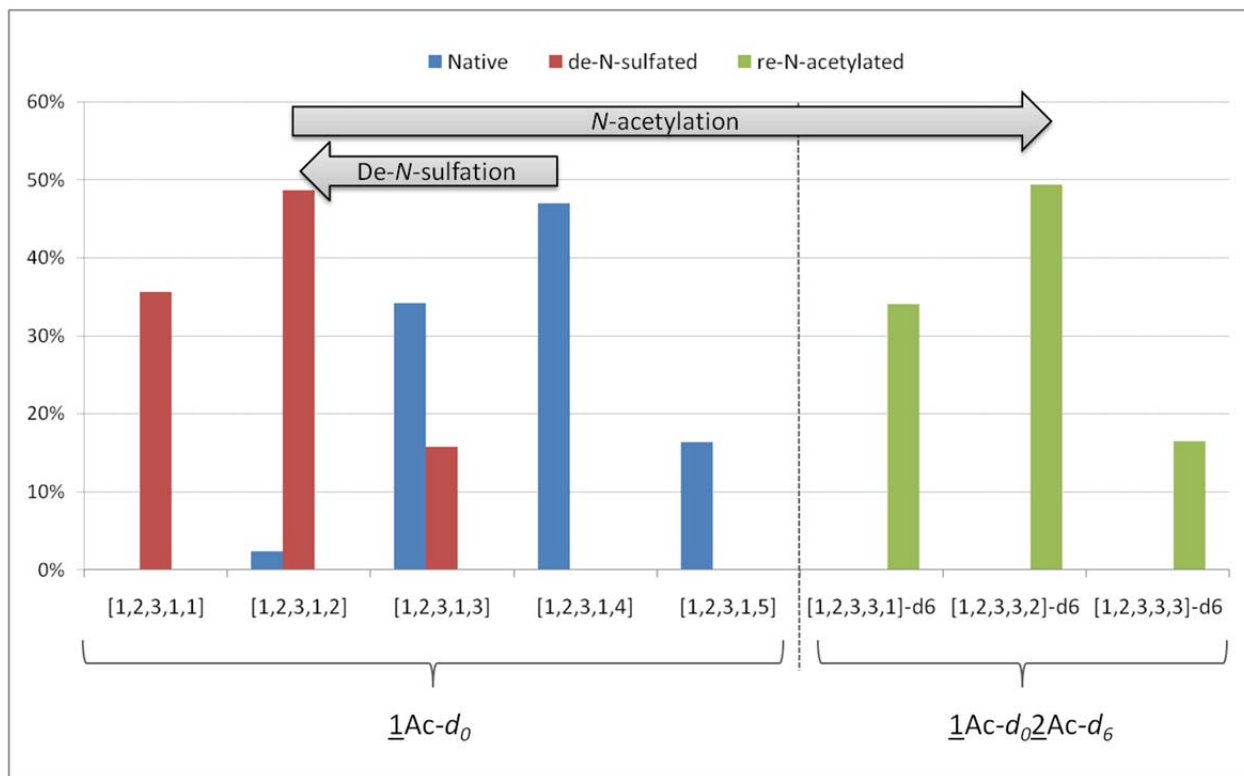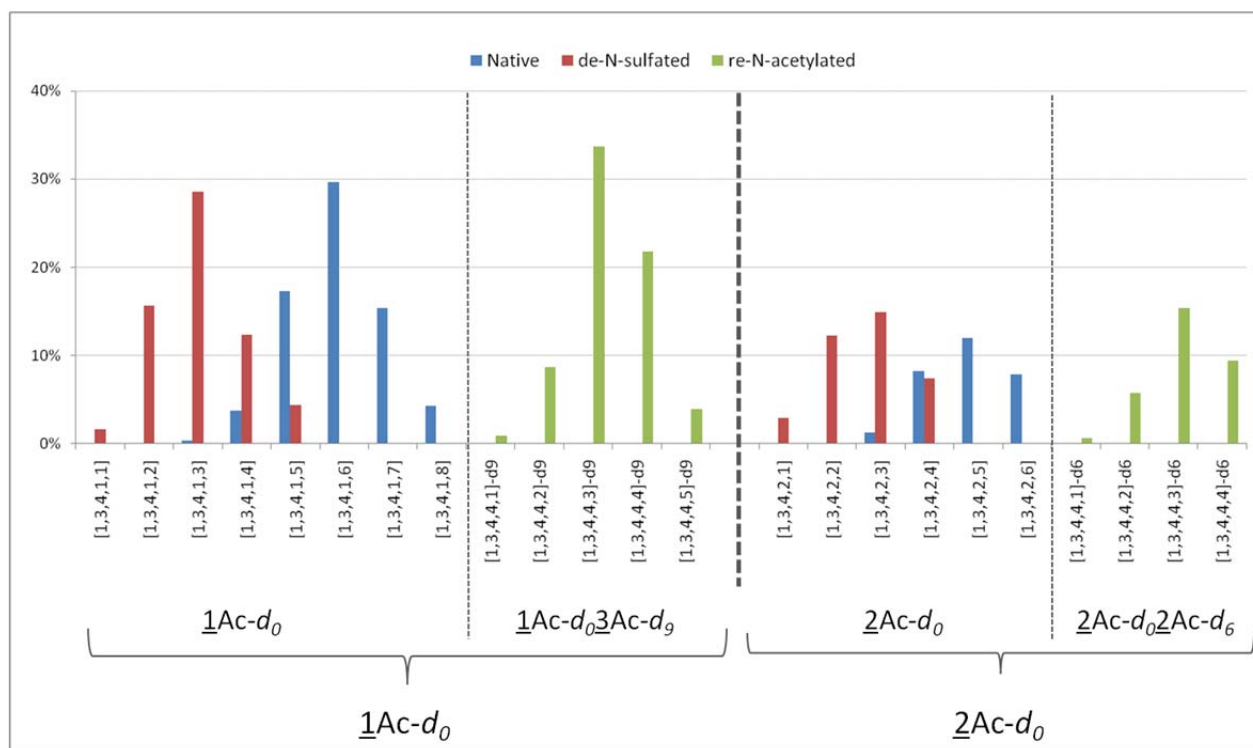



**Figure S6(A).** HILIC LC/MS profiles of species 2, 3 and 4 from the HS dp6 oligosaccharide, derivatization scheme shown in Figure 5.

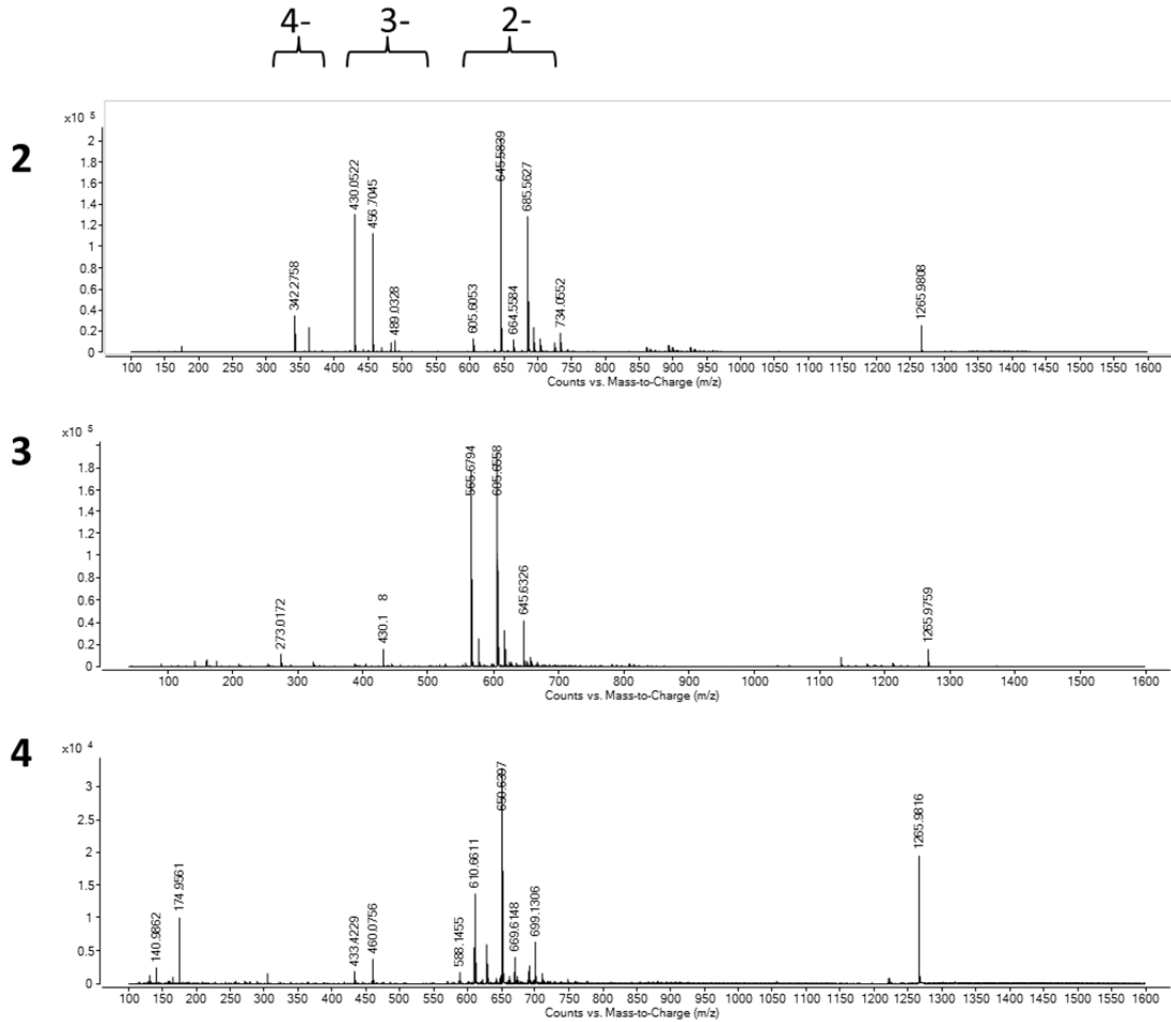

**Figure S6(B).** Extracted ion chromatograms (EIC) of products 2, 3, 4 of HS oligosaccharides. In 2, EICs are those of  $[1,2,3,1,3]^{2-}$ ,  $[1,2,3,1,4]^{2-}$ ,  $[1,2,3,1,5]^{2-}$ . In 3, EICs are those of  $[1,2,3,1,1]^{2-}$ ,  $[1,2,3,1,2]^{2-}$ ,  $[1,2,3,1,3]^{2-}$ . In 4, EICs are those of  $[1,2,3,3,1]-2d_3^{2-}$ ,  $[1,2,3,1,2]-2d_3^{2-}$ ,  $[1,2,3,1,3]-2d_3^{2-}$ . Please note there are multiple ionic species related to each molecular species including charge states and ammonium adducts. These EIC's are the most abundant ions and are representative.

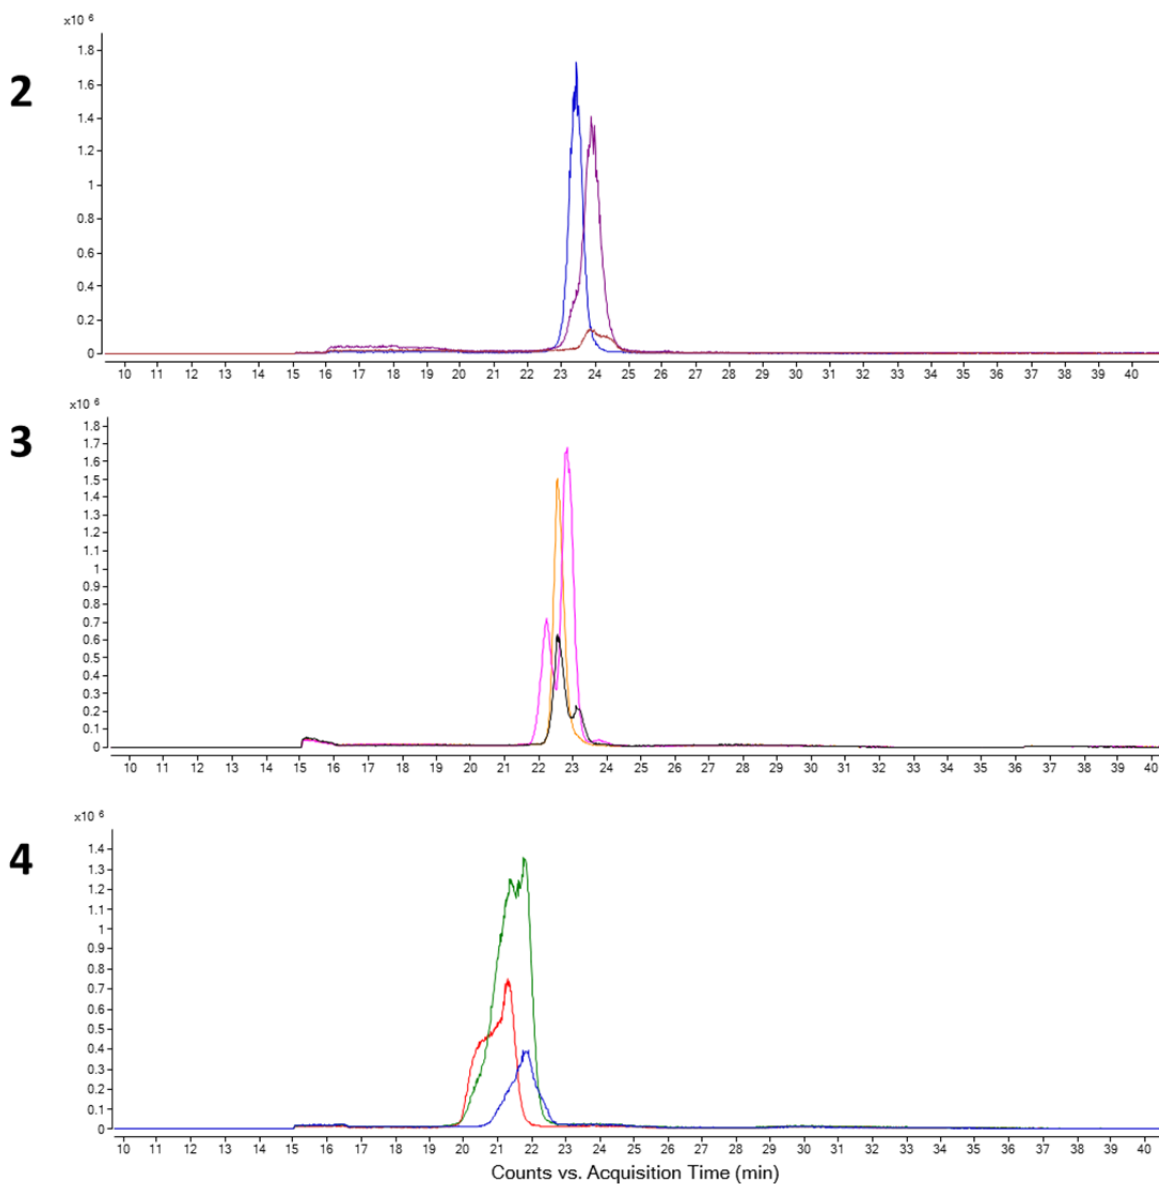

**Figure S7.** Charge state distribution of dp8's for chemical modification species 2, 3, 4 according to the scheme in Figure 5.

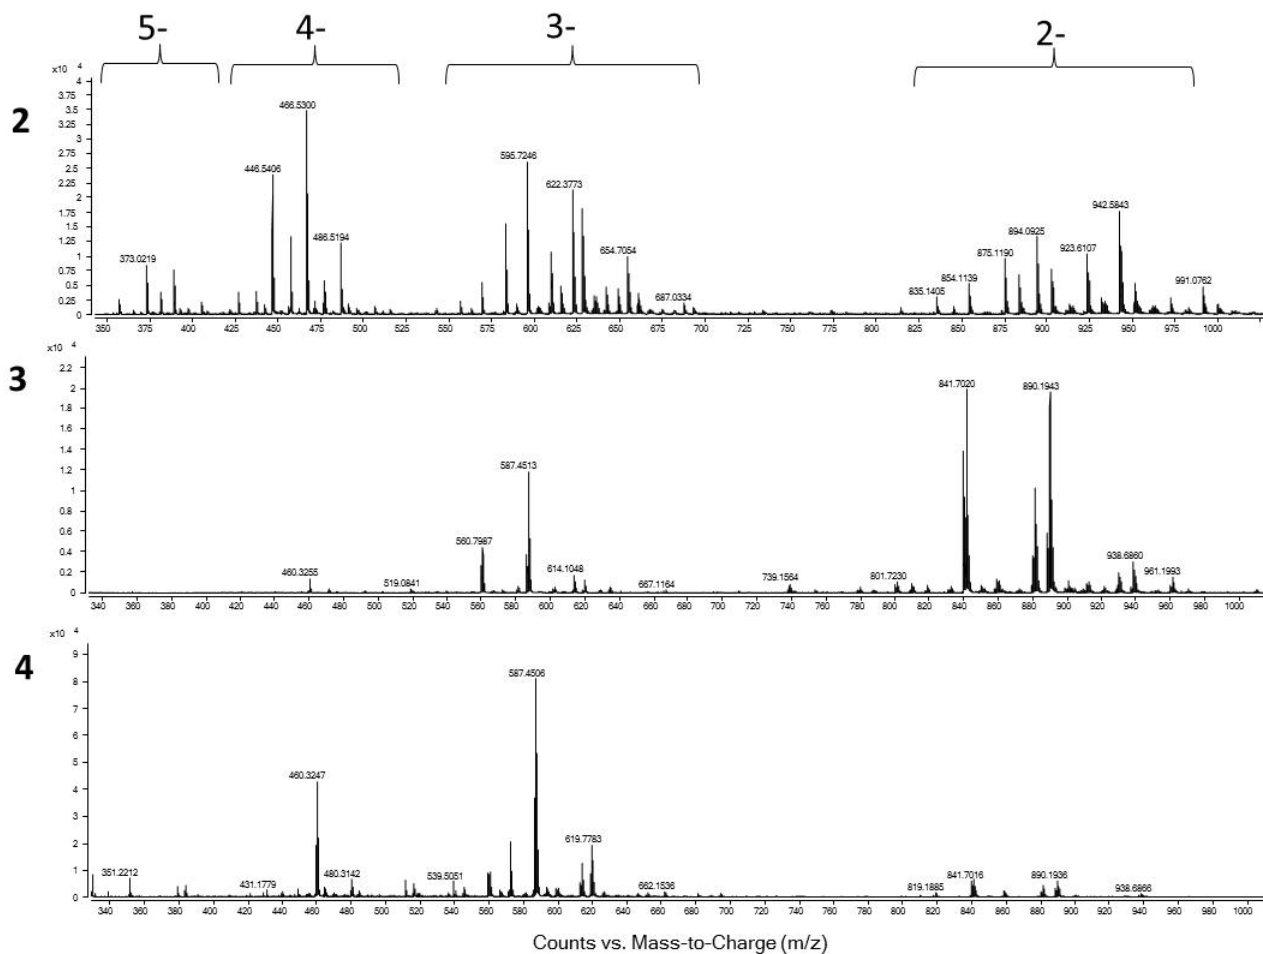

**Figure S8.** Tandem mass spectra of Arixtra before chemical modification (A) and after chemical modification (B). C demonstrates major backbone cleavages observed in B, the notations in bold denote fragments with no secondary sulfate loss.

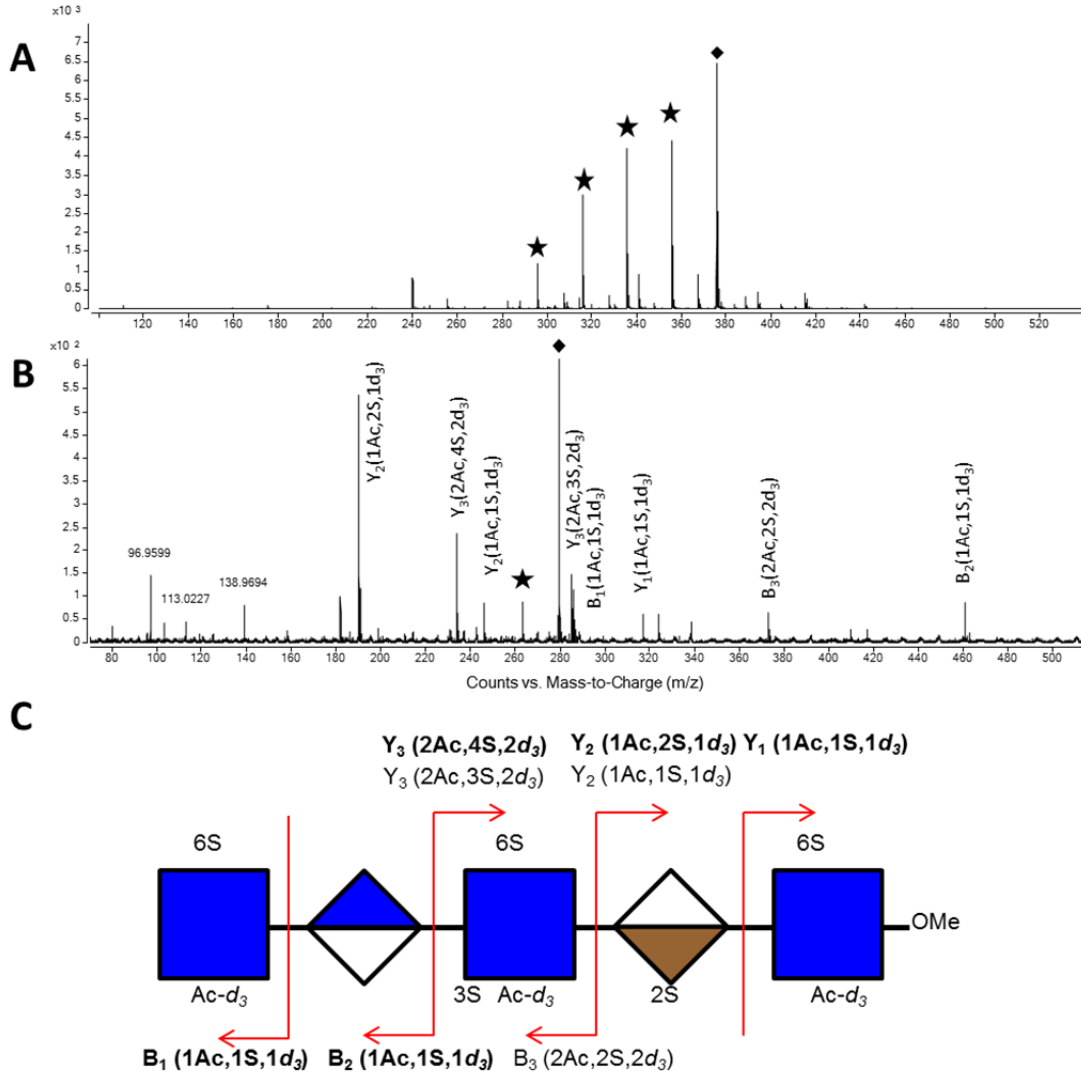

**Figure S9.** The charge distributions of (A) de-*N*-sulfated dp6 , (B) de-*N*-sulfated dp6 with sulfolane pulsing, and (C) de-*N*-sulfated and re-*N*-acetylated dp6 with sulfolane pulsing. The effect of charge state increase is more much pronounced in (C). Squares are background ions introduced by sulfolane pulsing.

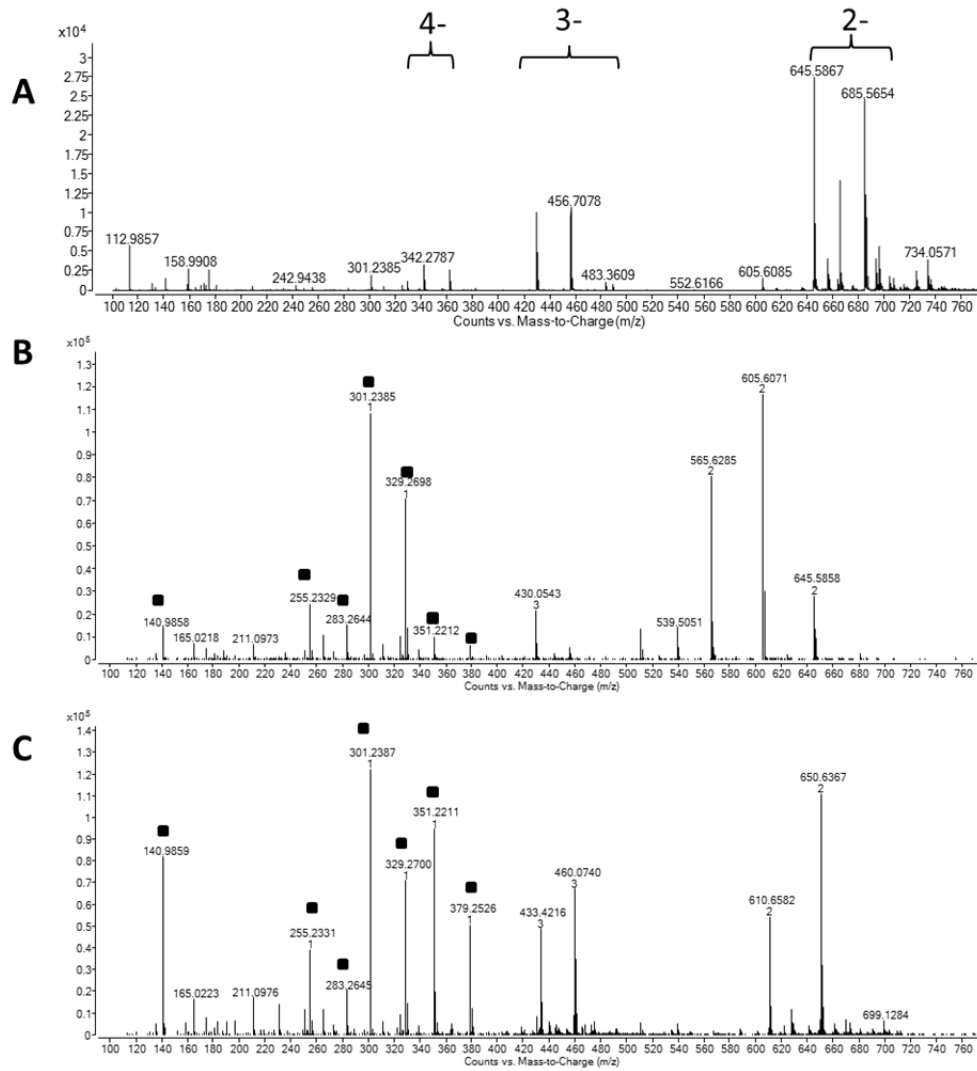

**Computational details, including coordinates, zero-point energies, thermal corrections, and frequencies.**

CH3NHSO3H

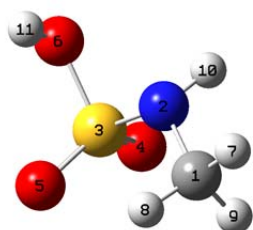

| Center Number | Atomic Number | Atomic Type | Coordinates (Angstroms) |           |           |
|---------------|---------------|-------------|-------------------------|-----------|-----------|
|               |               |             | X                       | Y         | Z         |
| 1             | 6             | 0           | 2.244506                | 0.018826  | -0.002428 |
| 2             | 7             | 0           | 0.981227                | 0.750213  | -0.215312 |
| 3             | 16            | 0           | -0.425127               | -0.159869 | -0.004199 |
| 4             | 8             | 0           | -0.831399               | -0.859639 | -1.211477 |
| 5             | 8             | 0           | -0.285688               | -0.843675 | 1.273153  |
| 6             | 8             | 0           | -1.491032               | 1.068409  | 0.131975  |
| 7             | 1             | 0           | 3.058706                | 0.742322  | -0.091671 |
| 8             | 1             | 0           | 2.243654                | -0.386561 | 1.009995  |
| 9             | 1             | 0           | 2.404153                | -0.795714 | -0.720270 |
| 10            | 1             | 0           | 0.936891                | 1.188758  | -1.134974 |
| 11            | 1             | 0           | -1.312051               | 1.523887  | 0.976661  |

SCF Done: E(RB+HF-LYP) = -719.783120040

Zero-point correction= 0.079732 (Hartree/Particle)  
 Thermal correction to Energy= 0.086674  
 Thermal correction to Enthalpy= 0.087618  
 Thermal correction to Gibbs Free Energy= 0.048693

Frequencies -- 76.0841 167.3168 226.4834  
 Frequencies -- 280.8891 358.3847 392.6806  
 Frequencies -- 460.8321 494.3605 533.4588  
 Frequencies -- 676.9081 804.0712 859.1654  
 Frequencies -- 1060.2689 1147.2001 1159.7485  
 Frequencies -- 1169.4230 1190.7027 1372.4449  
 Frequencies -- 1454.2922 1476.1794 1522.5841  
 Frequencies -- 1544.0390 3050.5391 3133.6128  
 Frequencies -- 3181.5243 3508.3240 3696.9410

**CH3NH2**

| Center<br>Number | Atomic<br>Number | Atomic<br>Type | Coordinates (Angstroms) |           |           |
|------------------|------------------|----------------|-------------------------|-----------|-----------|
|                  |                  |                | X                       | Y         | Z         |
| 1                | 6                | 0              | -0.705957               | -0.000017 | 0.017641  |
| 2                | 7                | 0              | 0.752450                | -0.000017 | -0.126116 |
| 3                | 1                | 0              | -1.115707               | -0.880862 | -0.488624 |
| 4                | 1                | 0              | -1.085788               | -0.001325 | 1.054627  |
| 5                | 1                | 0              | -1.115331               | 0.882387  | -0.486205 |
| 6                | 1                | 0              | 1.142662                | 0.812372  | 0.348575  |
| 7                | 1                | 0              | 1.142754                | -0.812353 | 0.348590  |

SCF Done: E(RB+HF-LYP) = -95.8936373692

Zero-point correction= 0.064429 (Hartree/Particle)  
Thermal correction to Energy= 0.067811  
Thermal correction to Enthalpy= 0.068755  
Thermal correction to Gibbs Free Energy= 0.041535

Frequencies -- 332.0885 876.3208 987.7921  
Frequencies -- 1069.4850 1192.1576 1371.2456  
Frequencies -- 1484.8092 1528.1042 1546.8375  
Frequencies -- 1703.6716 2972.4273 3080.0606  
Frequencies -- 3119.8531 3466.4501 3549.9063

S03

```
-----  
Center      Atomic      Atomic      Coordinates (Angstroms)  
Number      Number      Type        X           Y           Z  
-----  
  1          16          0           0.000000    0.000010    0.000000  
  2           8          0          -0.978321   -1.074830    0.000000  
  3           8          0           1.419962   -0.309904    0.000000  
  4           8          0          -0.441641    1.384714    0.000000  
-----
```

SCF Done: E(RB+HF-LYP) = -623.856339092

```
Zero-point correction=          0.011789 (Hartree/Particle)  
Thermal correction to Energy=          0.015384  
Thermal correction to Enthalpy=        0.016329  
Thermal correction to Gibbs Free Energy= -0.014686
```

```
Frequencies --   455.0821           497.3102           498.2307  
Frequencies --  1022.3781          1350.6996          1350.9881
```



CH3NHSO3H loss of SO3 transition state

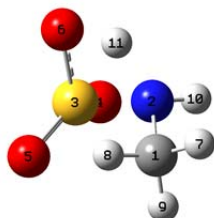

| Center Number | Atomic Number | Atomic Type | Coordinates (Angstroms) |           |           |
|---------------|---------------|-------------|-------------------------|-----------|-----------|
|               |               |             | X                       | Y         | Z         |
| 1             | 6             | 0           | 2.239807                | 0.215173  | 0.114914  |
| 2             | 7             | 0           | 1.064544                | -0.646048 | 0.321743  |
| 3             | 16            | 0           | -0.606664               | 0.107422  | -0.008710 |
| 4             | 8             | 0           | -1.432969               | -0.092693 | 1.174292  |
| 5             | 8             | 0           | -0.400683               | 1.444668  | -0.547035 |
| 6             | 8             | 0           | -0.702097               | -1.023649 | -1.073824 |
| 7             | 1             | 0           | 3.143177                | -0.393576 | 0.210593  |
| 8             | 1             | 0           | 2.194073                | 0.638791  | -0.888990 |
| 9             | 1             | 0           | 2.267358                | 1.030864  | 0.844214  |
| 10            | 1             | 0           | 1.051082                | -1.076858 | 1.248602  |
| 11            | 1             | 0           | 0.446271                | -1.313279 | -0.644206 |

SCF Done: E(RB+HF-LYP) = -719.741805740

Zero-point correction= 0.075907 (Hartree/Particle)  
 Thermal correction to Energy= 0.082332  
 Thermal correction to Enthalpy= 0.083277  
 Thermal correction to Gibbs Free Energy= 0.045311

Frequencies -- -1653.6221 106.6640 172.0125  
 Frequencies -- 202.3221 289.5682 406.4738  
 Frequencies -- 469.5911 509.2549 638.4670  
 Frequencies -- 649.9993 880.8321 956.8046  
 Frequencies -- 1061.1579 1104.0877 1163.4860  
 Frequencies -- 1207.8001 1313.1552 1347.5647  
 Frequencies -- 1425.8110 1477.2258 1518.9438  
 Frequencies -- 1528.9354 1993.4130 3073.5462  
 Frequencies -- 3146.0020 3182.3104 3493.8062

CH3NHSO3 anion

| Center<br>Number | Atomic<br>Number | Atomic<br>Type | Coordinates (Angstroms) |           |           |
|------------------|------------------|----------------|-------------------------|-----------|-----------|
|                  |                  |                | X                       | Y         | Z         |
| 1                | 7                | 0              | -1.015904               | 0.688208  | -0.000222 |
| 2                | 16               | 0              | 0.537781                | -0.046694 | 0.000036  |
| 3                | 8                | 0              | 1.402994                | 1.160718  | -0.000472 |
| 4                | 8                | 0              | 0.591470                | -0.866894 | 1.238383  |
| 5                | 8                | 0              | 0.591287                | -0.867869 | -1.237671 |
| 6                | 6                | 0              | -2.241375               | -0.053885 | -0.000094 |
| 7                | 1                | 0              | -1.005765               | 1.695456  | -0.000075 |
| 8                | 1                | 0              | -1.989873               | -1.118834 | -0.000579 |
| 9                | 1                | 0              | -2.867412               | 0.134025  | 0.892130  |
| 10               | 1                | 0              | -2.867882               | 0.134677  | -0.891844 |

SCF Done: E(RB+HF-LYP) = -719.268824222

|                                          |                             |
|------------------------------------------|-----------------------------|
| Zero-point correction=                   | 0.067895 (Hartree/Particle) |
| Thermal correction to Energy=            | 0.074154                    |
| Thermal correction to Enthalpy=          | 0.075098                    |
| Thermal correction to Gibbs Free Energy= | 0.037549                    |

|                |           |           |           |
|----------------|-----------|-----------|-----------|
| Frequencies -- | 89.9617   | 216.7902  | 230.9182  |
| Frequencies -- | 359.0570  | 391.7007  | 503.4149  |
| Frequencies -- | 522.8191  | 564.6501  | 672.8558  |
| Frequencies -- | 854.6617  | 999.2294  | 1067.6908 |
| Frequencies -- | 1144.4050 | 1158.2249 | 1217.1329 |
| Frequencies -- | 1247.0990 | 1417.4183 | 1455.7955 |
| Frequencies -- | 1513.8924 | 1548.1013 | 2989.4563 |
| Frequencies -- | 3043.2923 | 3121.9600 | 3471.9615 |

CH3NH<sup>-</sup> anion

| Center<br>Number | Atomic<br>Number | Atomic<br>Type | Coordinates (Angstroms) |           |           |
|------------------|------------------|----------------|-------------------------|-----------|-----------|
|                  |                  |                | X                       | Y         | Z         |
| 1                | 7                | 0              | -5.856226               | 0.749327  | -0.000459 |
| 2                | 6                | 0              | -6.810792               | -0.289495 | 0.000015  |
| 3                | 1                | 0              | -6.416719               | 1.625176  | 0.000089  |
| 4                | 1                | 0              | -6.294194               | -1.279938 | -0.000108 |
| 5                | 1                | 0              | -7.549044               | -0.402494 | 0.886171  |
| 6                | 1                | 0              | -7.549425               | -0.402476 | -0.885807 |

SCF Done: E(RB+HF-LYP) = -95.2362797958

Zero-point correction= 0.046112 (Hartree/Particle)  
Thermal correction to Energy= 0.049305  
Thermal correction to Enthalpy= 0.050250  
Thermal correction to Gibbs Free Energy= 0.023570

Frequencies -- 456.5459 1042.9312 1082.9411  
Frequencies -- 1138.5268 1382.8227 1444.7973  
Frequencies -- 1501.6566 1547.5048 2233.5357  
Frequencies -- 2426.8364 2822.7789 3159.8992

CH<sub>3</sub>NHSO<sub>3</sub><sup>-</sup>Na<sup>+</sup>

| Center<br>Number | Atomic<br>Number | Atomic<br>Type | Coordinates (Angstroms) |           |           |
|------------------|------------------|----------------|-------------------------|-----------|-----------|
|                  |                  |                | X                       | Y         | Z         |
| 1                | 6                | 0              | 2.162337                | 0.039820  | -0.001410 |
| 2                | 7                | 0              | 0.991839                | -0.742733 | -0.391302 |
| 3                | 16               | 0              | -0.526639               | 0.054399  | 0.011471  |
| 4                | 8                | 0              | -0.423943               | 0.416120  | 1.454002  |
| 5                | 8                | 0              | -0.552795               | 1.221499  | -0.902531 |
| 6                | 8                | 0              | -1.507237               | -1.019706 | -0.276929 |
| 7                | 1                | 0              | 3.076083                | -0.493299 | -0.301387 |
| 8                | 1                | 0              | 2.125460                | 0.989541  | -0.543752 |
| 9                | 1                | 0              | 2.214791                | 0.266034  | 1.076158  |
| 10               | 1                | 0              | 0.964794                | -1.615751 | 0.136690  |

SCF Done: E(RB+HF-LYP) = -719.268824222

Zero-point correction= 0.067895 (Hartree/Particle)

Thermal correction to Energy= 0.074154

Thermal correction to Enthalpy= 0.075098

Thermal correction to Gibbs Free Energy= 0.037549

|                |           |           |           |
|----------------|-----------|-----------|-----------|
| Frequencies -- | 456.5459  | 1042.9312 | 1082.9411 |
| Frequencies -- | 1138.5268 | 1382.8227 | 1444.7973 |
| Frequencies -- | 1501.6566 | 1547.5048 | 2233.5357 |
| Frequencies -- | 2426.8364 | 2822.7789 | 3159.8992 |

CH3NHNa

| Center<br>Number | Atomic<br>Number | Atomic<br>Type | Coordinates (Angstroms) |           |           |
|------------------|------------------|----------------|-------------------------|-----------|-----------|
|                  |                  |                | X                       | Y         | Z         |
| 1                | 6                | 0              | 1.570800                | -0.274150 | 0.020592  |
| 2                | 7                | 0              | 0.349097                | 0.502481  | -0.103624 |
| 3                | 1                | 0              | 2.425307                | 0.161788  | -0.538143 |
| 4                | 1                | 0              | 1.944220                | -0.433164 | 1.054679  |
| 5                | 1                | 0              | 1.422139                | -1.279627 | -0.403929 |
| 6                | 1                | 0              | 0.530320                | 1.416618  | 0.319244  |
| 7                | 11               | 0              | -1.653678               | -0.158008 | 0.015452  |

SCF Done: E(RB+HF-LYP) = -257.569681316

Zero-point correction= 0.051287 (Hartree/Particle)  
Thermal correction to Energy= 0.056091  
Thermal correction to Enthalpy= 0.057035  
Thermal correction to Gibbs Free Energy= 0.024408

Frequencies -- 126.5566 153.5348 410.7465  
Frequencies -- 469.9118 1053.5354 1077.7392  
Frequencies -- 1120.8450 1378.0848 1479.8795  
Frequencies -- 1507.5488 1544.1630 2875.5705  
Frequencies -- 2894.2727 3010.9615 3409.1083

CH3NHSO3Li

| Center<br>Number | Atomic<br>Number | Atomic<br>Type | Coordinates (Angstroms) |           |           |
|------------------|------------------|----------------|-------------------------|-----------|-----------|
|                  |                  |                | X                       | Y         | Z         |
| 1                | 6                | 0              | 0.926475                | -0.159709 | 0.000063  |
| 2                | 7                | 0              | -0.449148               | 0.308094  | -0.000304 |
| 3                | 1                | 0              | 1.513793                | 0.157256  | -0.884152 |
| 4                | 1                | 0              | 1.513299                | 0.157425  | 0.884477  |
| 5                | 1                | 0              | 0.948068                | -1.260481 | 0.000114  |
| 6                | 1                | 0              | -0.427952               | 1.329489  | 0.000727  |
| 7                | 3                | 0              | -1.987340               | -0.527363 | 0.000194  |

SCF Done: E(RB+HF-LYP) = -102.814442491

Zero-point correction= 0.052803 (Hartree/Particle)  
Thermal correction to Energy= 0.057232  
Thermal correction to Enthalpy= 0.058176  
Thermal correction to Gibbs Free Energy= 0.027761

|                |           |           |           |
|----------------|-----------|-----------|-----------|
| Frequencies -- | 75.9665   | 142.9554  | 198.1931  |
| Frequencies -- | 220.7764  | 375.9115  | 379.7170  |
| Frequencies -- | 407.8821  | 516.4443  | 547.6077  |
| Frequencies -- | 594.6857  | 634.4476  | 690.8219  |
| Frequencies -- | 832.7698  | 982.3886  | 1056.7644 |
| Frequencies -- | 1077.7671 | 1161.4481 | 1171.5984 |
| Frequencies -- | 1280.1539 | 1431.4758 | 1471.2563 |
| Frequencies -- | 1518.6620 | 1543.8594 | 3048.2748 |
| Frequencies -- | 3125.7542 | 3158.5750 | 3494.3673 |

CH3NHLi

| Center<br>Number | Atomic<br>Number | Atomic<br>Type | Coordinates (Angstroms) |           |           |
|------------------|------------------|----------------|-------------------------|-----------|-----------|
|                  |                  |                | X                       | Y         | Z         |
| 1                | 6                | 0              | 0.926475                | -0.159709 | 0.000063  |
| 2                | 7                | 0              | -0.449148               | 0.308094  | -0.000304 |
| 3                | 1                | 0              | 1.513793                | 0.157256  | -0.884152 |
| 4                | 1                | 0              | 1.513299                | 0.157425  | 0.884477  |
| 5                | 1                | 0              | 0.948068                | -1.260481 | 0.000114  |
| 6                | 1                | 0              | -0.427952               | 1.329489  | 0.000727  |
| 7                | 3                | 0              | -1.987340               | -0.527363 | 0.000194  |

SCF Done: E(RB+HF-LYP) = -102.814442491

Zero-point correction= 0.052803 (Hartree/Particle)  
Thermal correction to Energy= 0.057232  
Thermal correction to Enthalpy= 0.058176  
Thermal correction to Gibbs Free Energy= 0.027761

Frequencies -- 182.8471 184.1900 478.9401  
Frequencies -- 773.0027 1058.1169 1117.7051  
Frequencies -- 1139.6853 1394.4074 1485.3242  
Frequencies -- 1509.3910 1547.6084 2919.1961  
Frequencies -- 2926.9959 3021.3152 3439.0377

CH3OSO3H

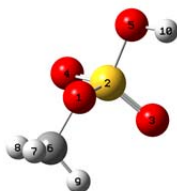

| Center Number | Atomic Number | Atomic Type | Coordinates (Angstroms) |           |           |
|---------------|---------------|-------------|-------------------------|-----------|-----------|
|               |               |             | X                       | Y         | Z         |
| 1             | 8             | 0           | 0.919551                | -0.663540 | -0.436476 |
| 2             | 16            | 0           | -0.400654               | 0.140935  | 0.070868  |
| 3             | 8             | 0           | -0.518901               | -0.006038 | 1.514226  |
| 4             | 8             | 0           | -0.466608               | 1.434282  | -0.574107 |
| 5             | 8             | 0           | -1.489075               | -0.811460 | -0.652577 |
| 6             | 6             | 0           | 2.177469                | -0.076667 | -0.016942 |
| 7             | 1             | 0           | 2.942787                | -0.728561 | -0.437568 |
| 8             | 1             | 0           | 2.274821                | 0.933773  | -0.422414 |
| 9             | 1             | 0           | 2.244828                | -0.065730 | 1.074323  |
| 10            | 1             | 0           | -1.676537               | -1.560399 | -0.055095 |

SCF Done: E(RB+HF-LYP) = -739.649374080

Zero-point correction= 0.066874 (Hartree/Particle)  
Thermal correction to Energy= 0.073805  
Thermal correction to Enthalpy= 0.074749  
Thermal correction to Gibbs Free Energy= 0.035477

Frequencies -- 98.8836 163.2628 178.8839  
Frequencies -- 245.6891 361.3020 402.6203  
Frequencies -- 464.3004 508.1796 556.5350  
Frequencies -- 740.2636 809.0907 1031.8512  
Frequencies -- 1142.4569 1182.9868 1199.6958  
Frequencies -- 1205.9312 1399.8774 1485.1605  
Frequencies -- 1515.1616 1529.7647 3081.5867  
Frequencies -- 3169.0466 3193.9389 3706.2772



CH3OSO3H TS to lose SO3

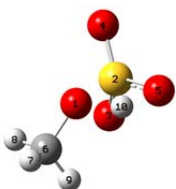

| Center Number | Atomic Number | Atomic Type | Coordinates (Angstroms) |           |           |
|---------------|---------------|-------------|-------------------------|-----------|-----------|
|               |               |             | X                       | Y         | Z         |
| 1             | 8             | 0           | -1.056464               | -0.582282 | 0.452127  |
| 2             | 16            | 0           | 0.628376                | 0.096091  | -0.031934 |
| 3             | 8             | 0           | 0.376791                | 1.348359  | -0.724267 |
| 4             | 8             | 0           | 1.470771                | 0.050094  | 1.145176  |
| 5             | 8             | 0           | 0.615264                | -1.174664 | -0.905398 |
| 6             | 6             | 0           | -2.210123               | 0.229575  | 0.150164  |
| 7             | 1             | 0           | -3.085486               | -0.386143 | 0.367118  |
| 8             | 1             | 0           | -2.197200               | 1.101647  | 0.807091  |
| 9             | 1             | 0           | -2.209207               | 0.547414  | -0.895667 |
| 10            | 1             | 0           | -0.552283               | -1.309879 | -0.409690 |

SCF Done: E(RB+HF-LYP) = -739.599141032

Zero-point correction= 0.062586 (Hartree/Particle)  
Thermal correction to Energy= 0.069045  
Thermal correction to Enthalpy= 0.069989  
Thermal correction to Gibbs Free Energy= 0.031814

Frequencies -- -1603.3488 98.5581 143.0414  
Frequencies -- 202.5839 278.2833 395.3636  
Frequencies -- 476.3110 502.4168 622.7171  
Frequencies -- 651.1720 962.0941 1039.5226  
Frequencies -- 1107.9760 1186.1849 1218.0329  
Frequencies -- 1254.0150 1379.2096 1487.0541  
Frequencies -- 1513.8603 1522.3002 2011.4837  
Frequencies -- 3077.4449 3167.2125 3175.4495

CH3OH

| Center<br>Number | Atomic<br>Number | Atomic<br>Type | Coordinates (Angstroms) |           |           |
|------------------|------------------|----------------|-------------------------|-----------|-----------|
|                  |                  |                | X                       | Y         | Z         |
| 1                | 6                | 0              | 0.662031                | -0.019516 | 0.000078  |
| 2                | 8                | 0              | -0.748930               | 0.122482  | -0.000099 |
| 3                | 1                | 0              | 1.079457                | 0.991134  | -0.000112 |
| 4                | 1                | 0              | 1.036787                | -0.543538 | 0.893374  |
| 5                | 1                | 0              | 1.036970                | -0.543952 | -0.892896 |
| 6                | 1                | 0              | -1.133966               | -0.766402 | -0.000047 |

SCF Done: E(RB+HF-LYP) = -115.764786860

Zero-point correction= 0.051476 (Hartree/Particle)  
Thermal correction to Energy= 0.054767  
Thermal correction to Enthalpy= 0.055711  
Thermal correction to Gibbs Free Energy= 0.028756

Frequencies -- 346.1513 1067.9019 1097.5621  
Frequencies -- 1183.6041 1399.9051 1511.4787  
Frequencies -- 1524.9230 1541.8263 2996.3354  
Frequencies -- 3038.4909 3131.7942 3755.5354

CH3OSO3 anion

| Center<br>Number | Atomic<br>Number | Atomic<br>Type | Coordinates (Angstroms) |           |           |
|------------------|------------------|----------------|-------------------------|-----------|-----------|
|                  |                  |                | X                       | Y         | Z         |
| 1                | 8                | 0              | -0.947434               | 0.834987  | -0.000135 |
| 2                | 16               | 0              | 0.516533                | -0.055029 | 0.000042  |
| 3                | 8                | 0              | 1.497113                | 1.044890  | -0.000034 |
| 4                | 8                | 0              | 0.448974                | -0.855917 | 1.245585  |
| 5                | 8                | 0              | 0.449097                | -0.856200 | -1.245327 |
| 6                | 6                | 0              | -2.100167               | 0.016368  | -0.000152 |
| 7                | 1                | 0              | -2.969309               | 0.687302  | -0.000200 |
| 8                | 1                | 0              | -2.138081               | -0.623586 | -0.893039 |
| 9                | 1                | 0              | -2.138142               | -0.623532 | 0.892771  |

SCF Done: E(RB+HF-LYP) = -739.145860683

Zero-point correction= 0.055194 (Hartree/Particle)  
Thermal correction to Energy= 0.061391  
Thermal correction to Enthalpy= 0.062336  
Thermal correction to Gibbs Free Energy= 0.024786

Frequencies -- 86.0850 167.0440 250.7604  
Frequencies -- 372.5162 394.3641 503.4220  
Frequencies -- 543.4119 574.1570 676.6090  
Frequencies -- 1001.3284 1089.1989 1188.0329  
Frequencies -- 1201.4697 1233.8833 1265.8303  
Frequencies -- 1475.1882 1506.0856 1548.0606  
Frequencies -- 3006.6437 3066.1697 3077.2014

CH3O anion

| Center<br>Number | Atomic<br>Number | Atomic<br>Type | Coordinates (Angstroms) |           |           |
|------------------|------------------|----------------|-------------------------|-----------|-----------|
|                  |                  |                | X                       | Y         | Z         |
| 1                | 8                | 0              | 0.788560                | -0.000001 | -0.000002 |
| 2                | 6                | 0              | -0.520653               | 0.000003  | -0.000003 |
| 3                | 1                | 0              | -1.061524               | 1.028302  | -0.054433 |
| 4                | 1                | 0              | -1.061541               | -0.561309 | -0.863290 |
| 5                | 1                | 0              | -1.061501               | -0.467008 | 0.917757  |

SCF Done: E(RB+HF-LYP) = -115.144818297

Zero-point correction= 0.034705 (Hartree/Particle)  
Thermal correction to Energy= 0.037595  
Thermal correction to Enthalpy= 0.038539  
Thermal correction to Gibbs Free Energy= 0.012476

Frequencies -- 1232.3686 1232.4336 1270.3482  
Frequencies -- 1459.5982 1459.6732 1608.4680  
Frequencies -- 2251.2081 2251.4078 2468.2249

CH3OSO3Na

| Center<br>Number | Atomic<br>Number | Atomic<br>Type | Coordinates (Angstroms) |           |           |
|------------------|------------------|----------------|-------------------------|-----------|-----------|
|                  |                  |                | X                       | Y         | Z         |
| 1                | 8                | 0              | -1.172087               | -0.589424 | 0.728570  |
| 2                | 16               | 0              | -0.071733               | 0.381735  | -0.023733 |
| 3                | 8                | 0              | 0.534882                | -0.468742 | -1.114116 |
| 4                | 8                | 0              | -0.768935               | 1.579276  | -0.486655 |
| 5                | 8                | 0              | 0.948377                | 0.564272  | 1.060346  |
| 6                | 6                | 0              | -2.365133               | -0.853052 | -0.029925 |
| 7                | 1                | 0              | -2.989553               | -1.470730 | 0.618278  |
| 8                | 1                | 0              | -2.879961               | 0.080959  | -0.271767 |
| 9                | 1                | 0              | -2.126240               | -1.399259 | -0.948824 |
| 10               | 11               | 0              | 2.454216                | -0.625771 | -0.031234 |

SCF Done: E(RB+HF-LYP) = -901.436209959

|                                          |                             |
|------------------------------------------|-----------------------------|
| Zero-point correction=                   | 0.057054 (Hartree/Particle) |
| Thermal correction to Energy=            | 0.064912                    |
| Thermal correction to Enthalpy=          | 0.065856                    |
| Thermal correction to Gibbs Free Energy= | 0.023841                    |

|                |           |           |           |
|----------------|-----------|-----------|-----------|
| Frequencies -- | 64.1708   | 84.9692   | 154.3309  |
| Frequencies -- | 225.6321  | 266.4206  | 300.4160  |
| Frequencies -- | 374.5533  | 443.7489  | 511.5138  |
| Frequencies -- | 556.4783  | 604.3504  | 735.5879  |
| Frequencies -- | 985.2514  | 1047.2707 | 1122.0645 |
| Frequencies -- | 1184.1829 | 1202.7352 | 1285.1987 |
| Frequencies -- | 1482.6409 | 1512.5309 | 1536.7339 |
| Frequencies -- | 3059.4911 | 3138.2390 | 3165.3277 |

CH3ONa

| Center<br>Number | Atomic<br>Number | Atomic<br>Type | Coordinates (Angstroms) |           |           |
|------------------|------------------|----------------|-------------------------|-----------|-----------|
|                  |                  |                | X                       | Y         | Z         |
| 1                | 6                | 0              | 1.640293                | -0.000392 | 0.000000  |
| 2                | 1                | 0              | 2.086125                | 1.020494  | -0.000062 |
| 3                | 1                | 0              | 2.084527                | -0.511612 | -0.884469 |
| 4                | 1                | 0              | 2.084527                | -0.511503 | 0.884531  |
| 5                | 8                | 0              | 0.270839                | 0.001033  | 0.000000  |
| 6                | 11               | 0              | -1.660332               | -0.000299 | 0.000000  |

SCF Done: E(RB+HF-LYP) = -277.474542374

Zero-point correction= 0.039626 (Hartree/Particle)

Thermal correction to Energy= 0.044316

Thermal correction to Enthalpy= 0.045260

Thermal correction to Gibbs Free Energy= 0.012596

|                |           |           |           |
|----------------|-----------|-----------|-----------|
| Frequencies -- | 77.0103   | 77.1287   | 485.1653  |
| Frequencies -- | 1197.7772 | 1197.9077 | 1217.3592 |
| Frequencies -- | 1521.3845 | 1521.5628 | 1536.2413 |
| Frequencies -- | 2853.7424 | 2853.7558 | 2854.8811 |

CH3OSO3Li

| Center<br>Number | Atomic<br>Number | Atomic<br>Type | Coordinates (Angstroms) |           |           |
|------------------|------------------|----------------|-------------------------|-----------|-----------|
|                  |                  |                | X                       | Y         | Z         |
| 1                | 8                | 0              | 0.973026                | -0.506739 | -0.670882 |
| 2                | 16               | 0              | -0.328499               | 0.215501  | 0.010024  |
| 3                | 8                | 0              | -0.731433               | -0.666612 | 1.177737  |
| 4                | 8                | 0              | 0.020233                | 1.589114  | 0.342076  |
| 5                | 8                | 0              | -1.387121               | -0.009646 | -1.038632 |
| 6                | 6                | 0              | 2.214023                | -0.348836 | 0.048260  |
| 7                | 1                | 0              | 2.964580                | -0.842566 | -0.570466 |
| 8                | 1                | 0              | 2.455058                | 0.710752  | 0.164911  |
| 9                | 1                | 0              | 2.154978                | -0.835815 | 1.026821  |
| 10               | 3                | 0              | -2.200134               | -1.212104 | 0.148797  |

SCF Done: E(RB+HF-LYP) = -746.671457071

|                                          |                             |
|------------------------------------------|-----------------------------|
| Zero-point correction=                   | 0.058324 (Hartree/Particle) |
| Thermal correction to Energy=            | 0.065618                    |
| Thermal correction to Enthalpy=          | 0.066562                    |
| Thermal correction to Gibbs Free Energy= | 0.026609                    |

|                |           |           |           |
|----------------|-----------|-----------|-----------|
| Frequencies -- | 73.9131   | 141.6825  | 157.6270  |
| Frequencies -- | 245.8788  | 363.3850  | 395.1718  |
| Frequencies -- | 417.9579  | 514.6190  | 566.4536  |
| Frequencies -- | 601.6380  | 639.2273  | 749.3009  |
| Frequencies -- | 981.9994  | 1038.0094 | 1098.1187 |
| Frequencies -- | 1183.5443 | 1202.7292 | 1304.3204 |
| Frequencies -- | 1484.7880 | 1513.7357 | 1533.4923 |
| Frequencies -- | 3067.2611 | 3149.4305 | 3177.0109 |

CH3OLi

| Center<br>Number | Atomic<br>Number | Atomic<br>Type | Coordinates (Angstroms) |           |           |
|------------------|------------------|----------------|-------------------------|-----------|-----------|
|                  |                  |                | X                       | Y         | Z         |
| 1                | 6                | 0              | -0.931525               | 0.000000  | -0.000207 |
| 2                | 1                | 0              | -1.358864               | -0.000126 | 1.022761  |
| 3                | 1                | 0              | -1.358281               | -0.885732 | -0.511399 |
| 4                | 1                | 0              | -1.358281               | 0.885858  | -0.511181 |
| 5                | 8                | 0              | 0.443495                | 0.000000  | 0.000194  |
| 6                | 3                | 0              | 2.038872                | 0.000000  | -0.000164 |

SCF Done: E(RB+HF-LYP) = -122.723975661

Zero-point correction= 0.041536 (Hartree/Particle)  
Thermal correction to Energy= 0.045722  
Thermal correction to Enthalpy= 0.046666  
Thermal correction to Gibbs Free Energy= 0.016942

Frequencies -- 167.0821 167.2318 841.0863  
Frequencies -- 1205.4147 1205.4395 1281.5453  
Frequencies -- 1526.0103 1526.4572 1529.5306  
Frequencies -- 2912.8665 2933.1752 2936.4660



GlcNAc, 6-sulfate, 4-OCH3, alpha anomer

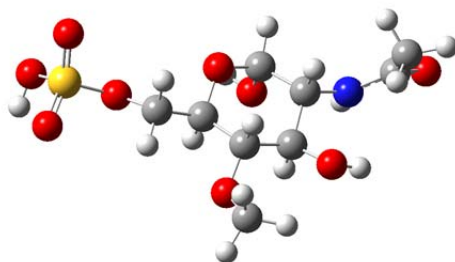

| Center Number | Atomic Number | Atomic Type | Coordinates (Angstroms) |           |           |
|---------------|---------------|-------------|-------------------------|-----------|-----------|
|               |               |             | X                       | Y         | Z         |
| 1             | 6             | 0           | -0.482344               | 1.342599  | 0.024441  |
| 2             | 6             | 0           | -1.887215               | 0.952667  | -0.450978 |
| 3             | 6             | 0           | -2.300182               | -0.426164 | 0.108607  |
| 4             | 6             | 0           | -1.224188               | -1.478753 | -0.189719 |
| 5             | 8             | 0           | 0.033412                | -1.046093 | 0.280527  |
| 6             | 6             | 0           | 0.495009                | 0.187387  | -0.279843 |
| 7             | 6             | 0           | 1.865531                | 0.455856  | 0.306915  |
| 8             | 8             | 0           | -1.240774               | -1.708631 | -1.582285 |
| 9             | 1             | 0           | -1.422466               | -2.403673 | 0.364844  |
| 10            | 8             | 0           | -2.809325               | 1.946214  | -0.016561 |
| 11            | 8             | 0           | 2.783956                | -0.504112 | -0.294668 |
| 12            | 16            | 0           | 4.296988                | -0.456433 | 0.296747  |
| 13            | 8             | 0           | 4.938285                | -1.520256 | -0.741584 |
| 14            | 8             | 0           | 4.859373                | 0.862353  | 0.043834  |
| 15            | 8             | 0           | 4.339386                | -1.067520 | 1.606902  |
| 16            | 7             | 0           | -3.599222               | -0.833203 | -0.400467 |
| 17            | 8             | 0           | -5.760641               | -1.481813 | -0.263771 |
| 18            | 6             | 0           | -4.788785               | -0.985029 | 0.285714  |
| 19            | 6             | 0           | -4.830948               | -0.487343 | 1.723464  |
| 20            | 8             | 0           | 0.024320                | 2.476387  | -0.655484 |
| 21            | 6             | 0           | -0.330194               | 3.740250  | -0.101556 |
| 22            | 1             | 0           | -0.514524               | 1.523222  | 1.112111  |
| 23            | 1             | 0           | -1.863006               | 0.905162  | -1.548981 |
| 24            | 1             | 0           | -2.361802               | -0.335390 | 1.195509  |
| 25            | 1             | 0           | 0.586225                | 0.096679  | -1.369427 |
| 26            | 1             | 0           | 2.189612                | 1.467628  | 0.056857  |
| 27            | 1             | 0           | 1.852554                | 0.306623  | 1.391101  |
| 28            | 1             | 0           | -0.624278               | -2.434373 | -1.772361 |
| 29            | 1             | 0           | -3.663376               | 1.726218  | -0.424422 |
| 30            | 1             | 0           | -3.604239               | -1.246654 | -1.327326 |
| 31            | 1             | 0           | -4.436476               | 0.529653  | 1.816873  |
| 32            | 1             | 0           | -5.870127               | -0.512943 | 2.053146  |
| 33            | 1             | 0           | -4.240723               | -1.136784 | 2.381650  |
| 34            | 1             | 0           | 0.219159                | 4.489026  | -0.677744 |
| 35            | 1             | 0           | -1.405341               | 3.926536  | -0.175479 |

|    |   |   |           |           |           |
|----|---|---|-----------|-----------|-----------|
| 36 | 1 | 0 | -0.026073 | 3.808535  | 0.953897  |
| 37 | 1 | 0 | 5.183577  | -1.035147 | -1.552468 |

-----

SCF Done: E(RB+HF-LYP) = -1483.42011519

|                                          |                             |
|------------------------------------------|-----------------------------|
| Zero-point correction=                   | 0.291319 (Hartree/Particle) |
| Thermal correction to Energy=            | 0.313056                    |
| Thermal correction to Enthalpy=          | 0.314000                    |
| Thermal correction to Gibbs Free Energy= | 0.237910                    |

|                |           |           |           |
|----------------|-----------|-----------|-----------|
| Frequencies -- | 17.0689   | 23.8120   | 34.6244   |
| Frequencies -- | 43.3543   | 57.4580   | 71.2950   |
| Frequencies -- | 81.3786   | 89.7646   | 104.4703  |
| Frequencies -- | 141.5219  | 163.2568  | 171.0559  |
| Frequencies -- | 180.2990  | 193.0926  | 225.0328  |
| Frequencies -- | 243.4909  | 252.9742  | 257.1889  |
| Frequencies -- | 271.1744  | 307.0954  | 344.8071  |
| Frequencies -- | 355.6847  | 370.3085  | 384.6023  |
| Frequencies -- | 392.8330  | 405.8325  | 440.0502  |
| Frequencies -- | 443.3066  | 474.9553  | 485.5781  |
| Frequencies -- | 490.9858  | 511.8729  | 539.2524  |
| Frequencies -- | 557.8660  | 561.7360  | 612.8912  |
| Frequencies -- | 617.2624  | 634.6480  | 682.0869  |
| Frequencies -- | 782.2623  | 801.7805  | 841.6327  |
| Frequencies -- | 848.1382  | 873.4663  | 935.5026  |
| Frequencies -- | 981.8188  | 992.2323  | 1030.1476 |
| Frequencies -- | 1042.3232 | 1061.8496 | 1068.2519 |
| Frequencies -- | 1085.9191 | 1088.3974 | 1110.1610 |
| Frequencies -- | 1133.5476 | 1152.7079 | 1155.1250 |
| Frequencies -- | 1159.9014 | 1173.2561 | 1177.0383 |
| Frequencies -- | 1182.5608 | 1189.5506 | 1220.3980 |
| Frequencies -- | 1229.1545 | 1241.8386 | 1285.2538 |
| Frequencies -- | 1302.3709 | 1317.1500 | 1343.5971 |
| Frequencies -- | 1351.6361 | 1366.6447 | 1378.8677 |
| Frequencies -- | 1388.1765 | 1398.9963 | 1407.4955 |
| Frequencies -- | 1414.2486 | 1423.0648 | 1445.5796 |
| Frequencies -- | 1451.6422 | 1458.9918 | 1500.4351 |
| Frequencies -- | 1503.8512 | 1511.0639 | 1513.0075 |
| Frequencies -- | 1517.9533 | 1526.7791 | 1546.1283 |
| Frequencies -- | 1798.0504 | 2992.8416 | 3018.3424 |
| Frequencies -- | 3037.8436 | 3058.4099 | 3066.2336 |
| Frequencies -- | 3070.8701 | 3088.3182 | 3111.6748 |
| Frequencies -- | 3121.7965 | 3124.6501 | 3153.4545 |
| Frequencies -- | 3164.3614 | 3179.0799 | 3575.3650 |
| Frequencies -- | 3698.4334 | 3725.7230 | 3740.8910 |

GlcNAc, 4-OMe, alpha anomer

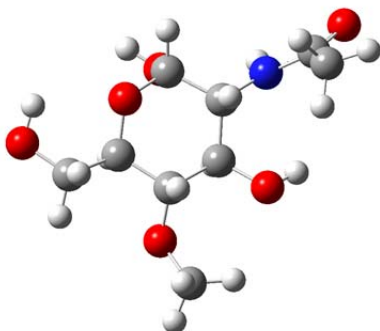

| Center Number | Atomic Number | Atomic Type | Coordinates (Angstroms) |           |           |
|---------------|---------------|-------------|-------------------------|-----------|-----------|
|               |               |             | X                       | Y         | Z         |
| 1             | 6             | 0           | 1.268076                | 0.876337  | 0.093294  |
| 2             | 6             | 0           | -0.158448               | 0.852177  | -0.468992 |
| 3             | 6             | 0           | -0.968421               | -0.316648 | 0.135616  |
| 4             | 6             | 0           | -0.212701               | -1.644172 | -0.014223 |
| 5             | 8             | 0           | 1.085454                | -1.534697 | 0.525517  |
| 6             | 6             | 0           | 1.912465                | -0.509541 | -0.066443 |
| 7             | 6             | 0           | 3.264487                | -0.635692 | 0.628089  |
| 8             | 8             | 0           | -0.215776               | -1.968401 | -1.388009 |
| 9             | 1             | 0           | -0.696005               | -2.432567 | 0.576429  |
| 10            | 8             | 0           | -0.798314               | 2.087877  | -0.163208 |
| 11            | 8             | 0           | 3.812732                | -1.930641 | 0.457066  |
| 12            | 7             | 0           | -2.297307               | -0.399300 | -0.448255 |
| 13            | 8             | 0           | -4.558264               | -0.406944 | -0.449974 |
| 14            | 6             | 0           | -3.520029               | -0.155292 | 0.144224  |
| 15            | 6             | 0           | -3.507090               | 0.452957  | 1.539497  |
| 16            | 8             | 0           | 2.110414                | 1.779082  | -0.602093 |
| 17            | 6             | 0           | 2.087361                | 3.124734  | -0.141045 |
| 18            | 1             | 0           | 1.220422                | 1.138513  | 1.163812  |
| 19            | 1             | 0           | -0.085151               | 0.718526  | -1.557466 |
| 20            | 1             | 0           | -1.067088               | -0.127273 | 1.207036  |
| 21            | 1             | 0           | 2.038172                | -0.721112 | -1.135037 |
| 22            | 1             | 0           | 3.963860                | 0.075722  | 0.184550  |
| 23            | 1             | 0           | 3.146027                | -0.386263 | 1.696067  |
| 24            | 1             | 0           | 0.193592                | -2.842279 | -1.493569 |
| 25            | 1             | 0           | -1.645983               | 2.085353  | -0.637825 |
| 26            | 1             | 0           | -2.359930               | -0.866421 | -1.346955 |
| 27            | 1             | 0           | -2.840466               | 1.318989  | 1.602392  |
| 28            | 1             | 0           | -4.527726               | 0.751813  | 1.780924  |
| 29            | 1             | 0           | -3.173922               | -0.280653 | 2.284014  |
| 30            | 1             | 0           | 2.856338                | 3.654834  | -0.709244 |
| 31            | 1             | 0           | 1.112914                | 3.594363  | -0.305816 |
| 32            | 1             | 0           | 2.334146                | 3.181325  | 0.930293  |
| 33            | 1             | 0           | 3.127780                | -2.547145 | 0.763685  |

SCF Done: E(RB+HF-LYP) = -859.539234254

Zero-point correction=

0.277041 (Hartree/Particle)

Thermal correction to Energy=

0.294372

Thermal correction to Enthalpy= 0.295316  
Thermal correction to Gibbs Free Energy= 0.231890

|                |           |           |           |
|----------------|-----------|-----------|-----------|
| Frequencies -- | 41.0633   | 52.9714   | 59.3583   |
| Frequencies -- | 79.1262   | 82.0837   | 113.6815  |
| Frequencies -- | 140.3248  | 160.5573  | 169.5519  |
| Frequencies -- | 191.0000  | 200.0307  | 228.7141  |
| Frequencies -- | 256.0545  | 269.5251  | 297.0480  |
| Frequencies -- | 315.7573  | 346.0031  | 357.2933  |
| Frequencies -- | 377.2972  | 391.3506  | 425.0599  |
| Frequencies -- | 438.9359  | 458.0425  | 486.3035  |
| Frequencies -- | 495.0328  | 551.9786  | 560.8148  |
| Frequencies -- | 613.3770  | 620.5478  | 632.5776  |
| Frequencies -- | 679.3592  | 786.3197  | 845.4937  |
| Frequencies -- | 854.4850  | 933.9142  | 984.1258  |
| Frequencies -- | 1011.8236 | 1034.7863 | 1052.6937 |
| Frequencies -- | 1067.2072 | 1069.9698 | 1087.8989 |
| Frequencies -- | 1089.9715 | 1109.7501 | 1133.0878 |
| Frequencies -- | 1138.7291 | 1149.2035 | 1157.9211 |
| Frequencies -- | 1172.4298 | 1189.1426 | 1215.7016 |
| Frequencies -- | 1228.1724 | 1234.5110 | 1254.2472 |
| Frequencies -- | 1299.6222 | 1315.6094 | 1342.2669 |
| Frequencies -- | 1353.4079 | 1359.4959 | 1382.2989 |
| Frequencies -- | 1388.0486 | 1405.8000 | 1411.3769 |
| Frequencies -- | 1414.7015 | 1425.5139 | 1448.1358 |
| Frequencies -- | 1455.3273 | 1457.8860 | 1500.3407 |
| Frequencies -- | 1503.3795 | 1511.0156 | 1512.8341 |
| Frequencies -- | 1520.1251 | 1533.4030 | 1546.3044 |
| Frequencies -- | 1796.7507 | 2987.8835 | 2994.5259 |
| Frequencies -- | 3014.5407 | 3039.8529 | 3058.4843 |
| Frequencies -- | 3059.9367 | 3073.9005 | 3105.5366 |
| Frequencies -- | 3122.8514 | 3125.8051 | 3145.4610 |
| Frequencies -- | 3147.4079 | 3178.8916 | 3576.9442 |
| Frequencies -- | 3726.9531 | 3729.9299 | 3741.8265 |

GlcNAc with 6-sulfate, 4-OCH<sub>3</sub>, alpha anomer, TS to lose 6-sulfate

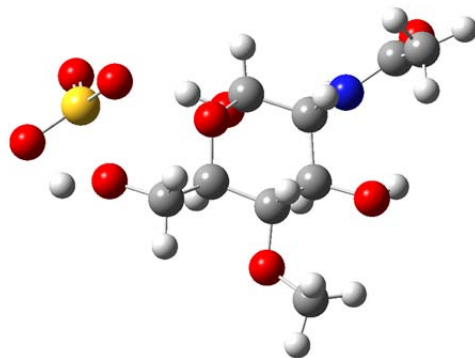

| Center Number | Atomic Number | Atomic Type | Coordinates (Angstroms) |           |           |
|---------------|---------------|-------------|-------------------------|-----------|-----------|
|               |               |             | X                       | Y         | Z         |
| 1             | 6             | 0           | -0.531058               | 1.729177  | 0.104269  |
| 2             | 6             | 0           | -1.812705               | 1.043600  | -0.390834 |
| 3             | 6             | 0           | -1.867109               | -0.434918 | 0.064110  |
| 4             | 6             | 0           | -0.573213               | -1.182275 | -0.290201 |
| 5             | 8             | 0           | 0.543357                | -0.463412 | 0.196211  |
| 6             | 6             | 0           | 0.666727                | 0.863717  | -0.321101 |
| 7             | 6             | 0           | 2.001549                | 1.382168  | 0.179795  |
| 8             | 8             | 0           | -0.540667               | -1.352638 | -1.686720 |
| 9             | 1             | 0           | -0.526376               | -2.145994 | 0.229205  |
| 10            | 8             | 0           | -2.940489               | 1.743839  | 0.121633  |
| 11            | 8             | 0           | 3.041431                | 0.606056  | -0.458897 |
| 12            | 16            | 0           | 3.647205                | -1.008618 | 0.284227  |
| 13            | 8             | 0           | 4.999464                | -0.318217 | 0.023530  |
| 14            | 8             | 0           | 3.217150                | -1.031892 | 1.670273  |
| 15            | 8             | 0           | 3.288425                | -2.075509 | -0.631383 |
| 16            | 7             | 0           | -3.035328               | -1.105431 | -0.481857 |
| 17            | 8             | 0           | -4.964060               | -2.282677 | -0.401279 |
| 18            | 6             | 0           | -4.140491               | -1.598280 | 0.186776  |
| 19            | 6             | 0           | -4.287685               | -1.227439 | 1.655501  |
| 20            | 8             | 0           | -0.321572               | 3.003470  | -0.477199 |
| 21            | 6             | 0           | -0.987936               | 4.090777  | 0.158620  |
| 22            | 1             | 0           | -0.566649               | 1.805229  | 1.203916  |
| 23            | 1             | 0           | -1.804088               | 1.083997  | -1.489730 |
| 24            | 1             | 0           | -1.939392               | -0.435296 | 1.154156  |
| 25            | 1             | 0           | 0.700791                | 0.836125  | -1.417272 |
| 26            | 1             | 0           | 2.147507                | 2.417965  | -0.130805 |
| 27            | 1             | 0           | 2.088737                | 1.290359  | 1.267347  |
| 28            | 1             | 0           | 0.241113                | -1.889573 | -1.900477 |
| 29            | 1             | 0           | -3.723372               | 1.346226  | -0.294805 |
| 30            | 1             | 0           | -2.944757               | -1.450408 | -1.432203 |
| 31            | 1             | 0           | -4.142808               | -0.155686 | 1.824785  |
| 32            | 1             | 0           | -5.288797               | -1.520736 | 1.973371  |

|    |   |   |           |           |           |
|----|---|---|-----------|-----------|-----------|
| 33 | 1 | 0 | -3.555905 | -1.765501 | 2.270614  |
| 34 | 1 | 0 | -0.634228 | 4.997246  | -0.339241 |
| 35 | 1 | 0 | -2.074276 | 4.011445  | 0.062421  |
| 36 | 1 | 0 | -0.726972 | 4.143581  | 1.226524  |
| 37 | 1 | 0 | 4.248701  | 0.675615  | -0.313404 |

-----

SCF Done: E(RB+HF-LYP) = -1483.37241243

Zero-point correction= 0.287189 (Hartree/Particle)  
 Thermal correction to Energy= 0.308264  
 Thermal correction to Enthalpy= 0.309208  
 Thermal correction to Gibbs Free Energy= 0.235063

|                |            |           |           |
|----------------|------------|-----------|-----------|
| Frequencies -- | -1596.8083 | 18.8413   | 30.2712   |
| Frequencies -- | 40.1202    | 49.9244   | 59.5444   |
| Frequencies -- | 71.6955    | 81.7192   | 88.3797   |
| Frequencies -- | 131.5244   | 148.8304  | 159.2519  |
| Frequencies -- | 173.4294   | 193.9325  | 204.6141  |
| Frequencies -- | 229.2782   | 252.1729  | 269.0468  |
| Frequencies -- | 275.7552   | 297.3087  | 314.1237  |
| Frequencies -- | 348.0394   | 373.7659  | 393.2327  |
| Frequencies -- | 403.7125   | 416.0200  | 437.8040  |
| Frequencies -- | 455.1010   | 477.4166  | 482.9947  |
| Frequencies -- | 490.9937   | 501.8749  | 547.9494  |
| Frequencies -- | 560.5164   | 587.3956  | 610.9055  |
| Frequencies -- | 620.1247   | 631.2615  | 681.8274  |
| Frequencies -- | 714.2511   | 788.9504  | 847.0079  |
| Frequencies -- | 870.8114   | 933.2107  | 956.6078  |
| Frequencies -- | 984.6358   | 1012.1304 | 1035.8171 |
| Frequencies -- | 1048.2261  | 1058.3487 | 1068.7477 |
| Frequencies -- | 1069.4771  | 1088.6024 | 1107.8668 |
| Frequencies -- | 1113.2148  | 1136.2064 | 1153.8621 |
| Frequencies -- | 1156.7074  | 1162.1029 | 1174.8102 |
| Frequencies -- | 1189.9504  | 1221.7170 | 1224.3685 |
| Frequencies -- | 1229.8646  | 1245.6105 | 1286.7599 |
| Frequencies -- | 1300.9293  | 1318.1854 | 1342.5940 |
| Frequencies -- | 1349.9480  | 1361.1369 | 1373.1379 |
| Frequencies -- | 1379.7806  | 1387.8378 | 1406.7463 |
| Frequencies -- | 1412.4238  | 1425.3142 | 1444.2003 |
| Frequencies -- | 1454.0128  | 1460.5468 | 1499.8786 |
| Frequencies -- | 1502.3581  | 1508.7637 | 1511.3180 |
| Frequencies -- | 1512.3546  | 1519.7689 | 1545.8134 |
| Frequencies -- | 1798.8934  | 2022.3095 | 2996.6962 |
| Frequencies -- | 3017.9611  | 3033.1852 | 3059.3193 |
| Frequencies -- | 3067.1002  | 3080.8729 | 3090.9045 |
| Frequencies -- | 3112.5225  | 3123.0019 | 3126.1106 |
| Frequencies -- | 3153.5083  | 3168.1732 | 3179.4741 |
| Frequencies -- | 3573.3497  | 3723.8245 | 3726.7486 |

GlcNAc, 6-sulfate anion, 4-OMe, anomer

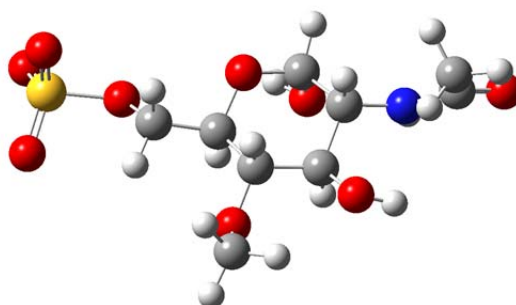

Standard orientation:

| Center Number | Atomic Number | Atomic Type | Coordinates (Angstroms) |           |           |
|---------------|---------------|-------------|-------------------------|-----------|-----------|
|               |               |             | X                       | Y         | Z         |
| 1             | 6             | 0           | -0.433827               | 1.271470  | -0.009759 |
| 2             | 6             | 0           | -1.851186               | 0.895563  | -0.454901 |
| 3             | 6             | 0           | -2.298057               | -0.447339 | 0.154166  |
| 4             | 6             | 0           | -1.231663               | -1.527264 | -0.082436 |
| 5             | 8             | 0           | 0.018269                | -1.097899 | 0.357506  |
| 6             | 6             | 0           | 0.530700                | 0.099075  | -0.272478 |
| 7             | 6             | 0           | 1.929218                | 0.329376  | 0.274428  |
| 8             | 8             | 0           | -1.262460               | -1.844350 | -1.466598 |
| 9             | 1             | 0           | -1.455718               | -2.420031 | 0.517876  |
| 10            | 8             | 0           | -2.753527               | 1.936390  | -0.065292 |
| 11            | 8             | 0           | 2.763880                | -0.689790 | -0.232530 |
| 12            | 16            | 0           | 4.423467                | -0.488345 | 0.191840  |
| 13            | 8             | 0           | 5.004431                | -1.666055 | -0.472970 |
| 14            | 8             | 0           | 4.774543                | 0.825125  | -0.394263 |
| 15            | 8             | 0           | 4.411278                | -0.517755 | 1.671513  |
| 16            | 7             | 0           | -3.596571               | -0.867624 | -0.359630 |
| 17            | 8             | 0           | -5.812471               | -1.325201 | -0.284533 |
| 18            | 6             | 0           | -4.818857               | -0.859519 | 0.263928  |
| 19            | 6             | 0           | -4.882624               | -0.238234 | 1.653770  |
| 20            | 8             | 0           | 0.028357                | 2.391092  | -0.751675 |
| 21            | 6             | 0           | -0.099157               | 3.641203  | -0.098320 |
| 22            | 1             | 0           | -0.442250               | 1.497038  | 1.068364  |
| 23            | 1             | 0           | -1.834511               | 0.805506  | -1.549528 |
| 24            | 1             | 0           | -2.374250               | -0.314329 | 1.235892  |
| 25            | 1             | 0           | 0.601749                | -0.059665 | -1.354974 |
| 26            | 1             | 0           | 2.277942                | 1.317809  | -0.051317 |
| 27            | 1             | 0           | 1.904119                | 0.307740  | 1.374217  |
| 28            | 1             | 0           | -0.489507               | -2.409287 | -1.635903 |

|    |   |   |           |           |           |
|----|---|---|-----------|-----------|-----------|
| 29 | 1 | 0 | -3.583219 | 1.770580  | -0.540679 |
| 30 | 1 | 0 | -3.583860 | -1.342779 | -1.256025 |
| 31 | 1 | 0 | -4.408929 | 0.747896  | 1.679411  |
| 32 | 1 | 0 | -5.933704 | -0.157793 | 1.934604  |
| 33 | 1 | 0 | -4.370303 | -0.871928 | 2.388127  |
| 34 | 1 | 0 | 0.340905  | 4.386184  | -0.767894 |
| 35 | 1 | 0 | -1.148902 | 3.895882  | 0.093538  |
| 36 | 1 | 0 | 0.455296  | 3.655620  | 0.852593  |

-----

SCF Done: E(RB+HF-LYP) = -1482.92278557

Zero-point correction= 0.279417 (Hartree/Particle)  
 Thermal correction to Energy= 0.300583  
 Thermal correction to Enthalpy= 0.301527  
 Thermal correction to Gibbs Free Energy= 0.226334

|                |           |           |           |
|----------------|-----------|-----------|-----------|
| Frequencies -- | 12.9048   | 27.5629   | 30.9360   |
| Frequencies -- | 48.4859   | 61.5572   | 63.3271   |
| Frequencies -- | 82.6754   | 91.6780   | 119.9457  |
| Frequencies -- | 140.6752  | 167.9784  | 170.8444  |
| Frequencies -- | 179.1982  | 184.6291  | 233.1546  |
| Frequencies -- | 247.8710  | 254.6043  | 274.0891  |
| Frequencies -- | 300.2459  | 338.9990  | 356.9560  |
| Frequencies -- | 366.6289  | 369.1609  | 373.1666  |
| Frequencies -- | 410.7421  | 439.4714  | 452.2599  |
| Frequencies -- | 474.9811  | 497.7671  | 518.8385  |
| Frequencies -- | 540.7286  | 549.8142  | 561.8827  |
| Frequencies -- | 567.7935  | 610.2711  | 619.9325  |
| Frequencies -- | 634.6177  | 681.1170  | 718.5391  |
| Frequencies -- | 791.3697  | 849.1754  | 861.2939  |
| Frequencies -- | 931.1132  | 991.8020  | 999.5098  |
| Frequencies -- | 1019.5342 | 1036.3190 | 1061.5227 |
| Frequencies -- | 1069.0597 | 1073.2570 | 1093.0412 |
| Frequencies -- | 1105.9615 | 1116.0187 | 1132.0460 |
| Frequencies -- | 1154.1691 | 1155.4040 | 1160.6864 |
| Frequencies -- | 1170.4241 | 1189.5777 | 1220.1173 |
| Frequencies -- | 1230.2022 | 1235.7823 | 1241.5936 |
| Frequencies -- | 1272.2619 | 1276.1947 | 1296.5376 |
| Frequencies -- | 1315.6914 | 1338.8131 | 1362.1895 |
| Frequencies -- | 1364.0499 | 1374.7911 | 1389.2029 |
| Frequencies -- | 1405.9222 | 1412.3613 | 1426.3535 |
| Frequencies -- | 1432.7590 | 1450.1333 | 1456.6392 |
| Frequencies -- | 1498.8485 | 1501.7856 | 1511.2949 |
| Frequencies -- | 1515.5206 | 1520.5726 | 1538.8746 |
| Frequencies -- | 1544.1306 | 1782.5996 | 3004.6327 |
| Frequencies -- | 3012.7752 | 3019.4266 | 3037.5443 |
| Frequencies -- | 3045.3175 | 3058.6594 | 3069.0204 |
| Frequencies -- | 3078.7218 | 3079.5634 | 3120.3580 |
| Frequencies -- | 3126.3356 | 3129.1636 | 3173.8755 |
| Frequencies -- | 3578.7387 | 3726.9817 | 3736.3359 |



GlcNAc, 6-O anion, 4-OMe, anomer

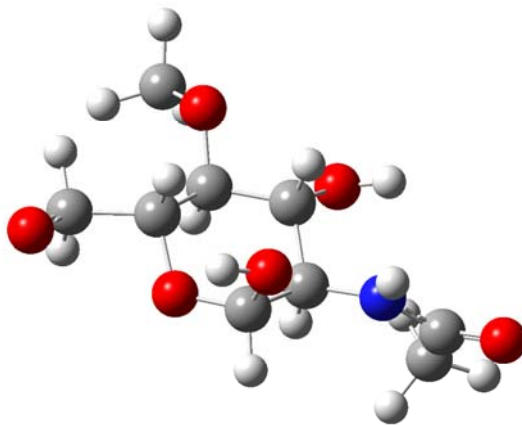

Standard orientation:

| Center Number | Atomic Number | Atomic Type | Coordinates (Angstroms) |           |           |
|---------------|---------------|-------------|-------------------------|-----------|-----------|
|               |               |             | X                       | Y         | Z         |
| 1             | 6             | 0           | 1.251977                | 0.843321  | 0.049860  |
| 2             | 6             | 0           | -0.195529               | 0.816828  | -0.444532 |
| 3             | 6             | 0           | -1.004007               | -0.316482 | 0.209919  |
| 4             | 6             | 0           | -0.235219               | -1.646221 | 0.152160  |
| 5             | 8             | 0           | 1.048501                | -1.509086 | 0.639189  |
| 6             | 6             | 0           | 1.907342                | -0.545875 | -0.047864 |
| 7             | 6             | 0           | 3.340120                | -0.737067 | 0.582701  |
| 8             | 8             | 0           | -0.279965               | -2.106523 | -1.201767 |
| 9             | 1             | 0           | -0.728153               | -2.385358 | 0.803640  |
| 10            | 8             | 0           | -0.818266               | 2.082267  | -0.167046 |
| 11            | 8             | 0           | 3.848655                | -1.918941 | 0.358582  |
| 12            | 7             | 0           | -2.329826               | -0.456682 | -0.390887 |
| 13            | 8             | 0           | -4.586859               | -0.306793 | -0.523888 |
| 14            | 6             | 0           | -3.547643               | -0.060973 | 0.086216  |
| 15            | 6             | 0           | -3.557021               | 0.703151  | 1.405703  |
| 16            | 8             | 0           | 1.935451                | 1.790479  | -0.776662 |
| 17            | 6             | 0           | 2.732001                | 2.718904  | -0.076695 |
| 18            | 1             | 0           | 1.263149                | 1.175334  | 1.100599  |
| 19            | 1             | 0           | -0.163619               | 0.651618  | -1.530229 |
| 20            | 1             | 0           | -1.122667               | -0.072294 | 1.268574  |
| 21            | 1             | 0           | 1.983828                | -0.830149 | -1.105385 |
| 22            | 1             | 0           | 3.919056                | 0.167785  | 0.169357  |
| 23            | 1             | 0           | 3.165828                | -0.426749 | 1.679017  |
| 24            | 1             | 0           | 0.492263                | -2.692257 | -1.286937 |
| 25            | 1             | 0           | -1.611653               | 2.121241  | -0.723981 |
| 26            | 1             | 0           | -2.365893               | -1.004883 | -1.243850 |
| 27            | 1             | 0           | -2.831909               | 1.522450  | 1.402082  |
| 28            | 1             | 0           | -4.565812               | 1.089611  | 1.560318  |

|    |   |   |           |          |           |
|----|---|---|-----------|----------|-----------|
| 29 | 1 | 0 | -3.302118 | 0.039234 | 2.241014  |
| 30 | 1 | 0 | 3.150619  | 3.402022 | -0.825137 |
| 31 | 1 | 0 | 2.135141  | 3.307948 | 0.639431  |
| 32 | 1 | 0 | 3.558462  | 2.226482 | 0.455632  |

-----

SCF Done: E(RB+HF-LYP) = -858.939391630

Range of M.O.s used for correlation: 1 272

Zero-point correction= 0.260343 (Hartree/Particle)

Thermal correction to Energy= 0.277552

Thermal correction to Enthalpy= 0.278496

Thermal correction to Gibbs Free Energy= 0.214509

|                |           |           |           |
|----------------|-----------|-----------|-----------|
| Frequencies -- | 18.6918   | 46.0088   | 58.7609   |
| Frequencies -- | 73.5167   | 86.9702   | 123.1714  |
| Frequencies -- | 138.8258  | 165.1238  | 176.2066  |
| Frequencies -- | 193.9091  | 199.2094  | 243.5954  |
| Frequencies -- | 250.8068  | 272.4267  | 286.4951  |
| Frequencies -- | 305.7264  | 324.9234  | 350.8221  |
| Frequencies -- | 364.9541  | 374.0327  | 412.4809  |
| Frequencies -- | 442.0259  | 483.6258  | 498.8757  |
| Frequencies -- | 555.0685  | 563.9219  | 583.9908  |
| Frequencies -- | 613.7282  | 628.5500  | 688.3853  |
| Frequencies -- | 777.8905  | 813.6888  | 849.1107  |
| Frequencies -- | 912.0686  | 944.7128  | 989.3174  |
| Frequencies -- | 1030.5675 | 1042.1424 | 1062.4779 |
| Frequencies -- | 1070.3536 | 1079.7042 | 1097.6026 |
| Frequencies -- | 1114.0013 | 1121.6957 | 1148.6038 |
| Frequencies -- | 1157.4715 | 1169.9414 | 1187.6934 |
| Frequencies -- | 1207.2518 | 1231.6963 | 1248.2461 |
| Frequencies -- | 1279.6013 | 1293.6321 | 1302.4346 |
| Frequencies -- | 1309.1550 | 1325.2391 | 1338.3963 |
| Frequencies -- | 1366.7744 | 1371.0718 | 1383.6972 |
| Frequencies -- | 1397.0117 | 1406.3034 | 1418.3458 |
| Frequencies -- | 1426.9328 | 1444.2976 | 1456.8242 |
| Frequencies -- | 1495.9713 | 1498.1663 | 1512.1805 |
| Frequencies -- | 1512.5975 | 1523.3222 | 1535.9087 |
| Frequencies -- | 1540.0230 | 1773.2194 | 2385.0429 |
| Frequencies -- | 2497.0913 | 2981.0585 | 2997.1787 |
| Frequencies -- | 3002.3645 | 3039.1483 | 3045.7425 |
| Frequencies -- | 3047.9473 | 3057.4264 | 3095.5315 |
| Frequencies -- | 3115.1595 | 3125.8399 | 3169.8735 |
| Frequencies -- | 3579.4942 | 3713.4479 | 3732.9568 |

GlcNAc 6-OSO<sub>3</sub>Na, 4-OMe, alpha aomer

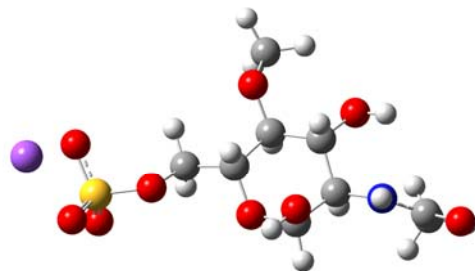

| Center Number | Atomic Number | Atomic Type | Coordinates (Angstroms) |           |           |
|---------------|---------------|-------------|-------------------------|-----------|-----------|
|               |               |             | X                       | Y         | Z         |
| 1             | 6             | 0           | -0.843824               | 1.330536  | 0.052248  |
| 2             | 6             | 0           | -2.227129               | 0.933408  | -0.476722 |
| 3             | 6             | 0           | -2.669928               | -0.432493 | 0.088628  |
| 4             | 6             | 0           | -1.580744               | -1.490502 | -0.133238 |
| 5             | 8             | 0           | -0.349590               | -1.049281 | 0.382303  |
| 6             | 6             | 0           | 0.147315                | 0.172197  | -0.183346 |
| 7             | 6             | 0           | 1.496468                | 0.440014  | 0.455733  |
| 8             | 8             | 0           | -1.535809               | -1.756704 | -1.521299 |
| 9             | 1             | 0           | -1.808460               | -2.402744 | 0.431982  |
| 10            | 8             | 0           | -3.167449               | 1.938617  | -0.107331 |
| 11            | 8             | 0           | 2.425225                | -0.524015 | -0.082126 |
| 12            | 16            | 0           | 3.942940                | -0.469624 | 0.561192  |
| 13            | 8             | 0           | 4.605661                | -1.604807 | -0.160913 |
| 14            | 8             | 0           | 4.538918                | 0.826762  | 0.068051  |
| 15            | 8             | 0           | 3.823656                | -0.586198 | 2.012073  |
| 16            | 7             | 0           | -3.942484               | -0.851018 | -0.478171 |
| 17            | 8             | 0           | -6.115012               | -1.477456 | -0.445735 |
| 18            | 6             | 0           | -5.168408               | -0.974628 | 0.142939  |
| 19            | 6             | 0           | -5.284551               | -0.441149 | 1.563836  |
| 20            | 8             | 0           | -0.319274               | 2.456084  | -0.631756 |
| 21            | 6             | 0           | -0.665224               | 3.722799  | -0.084133 |
| 22            | 1             | 0           | -0.920911               | 1.534764  | 1.132978  |
| 23            | 1             | 0           | -2.153294               | 0.864225  | -1.571322 |
| 24            | 1             | 0           | -2.785818               | -0.320620 | 1.169128  |
| 25            | 1             | 0           | 0.283479                | 0.053902  | -1.265495 |
| 26            | 1             | 0           | 1.827158                | 1.451522  | 0.204534  |
| 27            | 1             | 0           | 1.434753                | 0.320863  | 1.542209  |
| 28            | 1             | 0           | -0.873110               | -2.452315 | -1.663608 |
| 29            | 1             | 0           | -3.998871               | 1.715331  | -0.557593 |
| 30            | 1             | 0           | -3.898305               | -1.288057 | -1.393011 |
| 31            | 1             | 0           | -4.880366               | 0.572022  | 1.655625  |
| 32            | 1             | 0           | -6.340894               | -0.445330 | 1.834937  |
| 33            | 1             | 0           | -4.741161               | -1.082489 | 2.268615  |

|    |    |   |           |           |           |
|----|----|---|-----------|-----------|-----------|
| 34 | 1  | 0 | -0.115830 | 4.467521  | -0.666317 |
| 35 | 1  | 0 | -1.740175 | 3.914950  | -0.154567 |
| 36 | 1  | 0 | -0.355691 | 3.797354  | 0.969543  |
| 37 | 11 | 0 | 5.918492  | -0.234083 | -1.293756 |

-----

SCF Done: E(RB+HF-LYP) = -1645.20717800

|                                          |                             |
|------------------------------------------|-----------------------------|
| Zero-point correction=                   | 0.281408 (Hartree/Particle) |
| Thermal correction to Energy=            | 0.304177                    |
| Thermal correction to Enthalpy=          | 0.305121                    |
| Thermal correction to Gibbs Free Energy= | 0.225732                    |

|                |           |           |           |
|----------------|-----------|-----------|-----------|
| Frequencies -- | 11.2634   | 19.4428   | 32.4956   |
| Frequencies -- | 40.5554   | 56.8681   | 57.9204   |
| Frequencies -- | 78.3103   | 80.7449   | 101.8027  |
| Frequencies -- | 107.1123  | 141.5196  | 165.6270  |
| Frequencies -- | 171.0354  | 179.2747  | 186.2668  |
| Frequencies -- | 232.3785  | 246.8415  | 254.5806  |
| Frequencies -- | 258.1180  | 270.6815  | 303.4572  |
| Frequencies -- | 308.2312  | 345.0377  | 356.6353  |
| Frequencies -- | 367.5867  | 392.8520  | 401.5216  |
| Frequencies -- | 423.7741  | 441.7077  | 458.9301  |
| Frequencies -- | 476.5044  | 496.3242  | 523.4181  |
| Frequencies -- | 549.4585  | 558.5334  | 563.0874  |
| Frequencies -- | 587.4666  | 615.6793  | 625.6638  |
| Frequencies -- | 643.1358  | 680.4598  | 778.1393  |
| Frequencies -- | 798.1809  | 848.3582  | 870.5638  |
| Frequencies -- | 933.8753  | 978.7478  | 987.0033  |
| Frequencies -- | 1013.0926 | 1034.3461 | 1053.9135 |
| Frequencies -- | 1062.7404 | 1068.2372 | 1085.9231 |
| Frequencies -- | 1092.0554 | 1111.2932 | 1123.3652 |
| Frequencies -- | 1134.7563 | 1153.9975 | 1156.0336 |
| Frequencies -- | 1159.6237 | 1173.1743 | 1189.2443 |
| Frequencies -- | 1220.4911 | 1229.3177 | 1242.1036 |
| Frequencies -- | 1275.9392 | 1293.9470 | 1302.3795 |
| Frequencies -- | 1317.3947 | 1341.5326 | 1354.4147 |
| Frequencies -- | 1368.2206 | 1377.5529 | 1388.5100 |
| Frequencies -- | 1407.9197 | 1413.6409 | 1423.1713 |
| Frequencies -- | 1443.5611 | 1451.6976 | 1459.3706 |
| Frequencies -- | 1499.6183 | 1502.1183 | 1510.0499 |
| Frequencies -- | 1513.0138 | 1518.0780 | 1532.2874 |
| Frequencies -- | 1546.6640 | 1795.0975 | 2997.7511 |
| Frequencies -- | 3015.6588 | 3037.7527 | 3058.6070 |
| Frequencies -- | 3063.4243 | 3065.2042 | 3080.5157 |
| Frequencies -- | 3105.2389 | 3121.9465 | 3125.2030 |
| Frequencies -- | 3140.8070 | 3146.3712 | 3178.2013 |
| Frequencies -- | 3576.0218 | 3726.6019 | 3737.4869 |

GlcNAc, 6-ONa, 4-OMe, alpha anomer

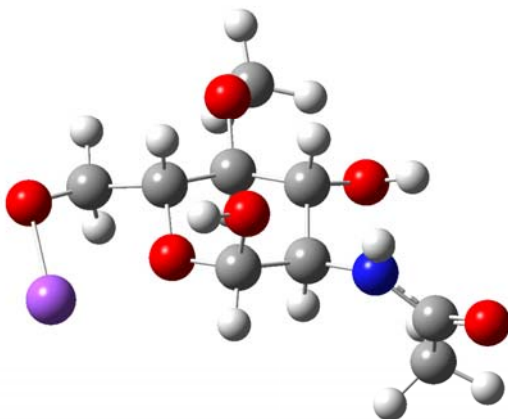

| Center Number | Atomic Number | Atomic Type | Coordinates (Angstroms) |           |           |
|---------------|---------------|-------------|-------------------------|-----------|-----------|
|               |               |             | X                       | Y         | Z         |
| 1             | 6             | 0           | 0.854174                | 1.258396  | 0.052499  |
| 2             | 6             | 0           | -0.584863               | 1.032656  | -0.423767 |
| 3             | 6             | 0           | -1.122227               | -0.331177 | 0.054101  |
| 4             | 6             | 0           | -0.152454               | -1.448689 | -0.341232 |
| 5             | 8             | 0           | 1.140004                | -1.194525 | 0.171504  |
| 6             | 6             | 0           | 1.773118                | 0.066067  | -0.266465 |
| 7             | 6             | 0           | 3.158010                | 0.151313  | 0.433660  |
| 8             | 8             | 0           | -0.184318               | -1.538382 | -1.747915 |
| 9             | 1             | 0           | -0.458006               | -2.401192 | 0.117727  |
| 10            | 8             | 0           | -1.403252               | 2.082910  | 0.090520  |
| 11            | 8             | 0           | 3.959628                | -0.932533 | 0.231266  |
| 12            | 7             | 0           | -2.455967               | -0.606157 | -0.454190 |
| 13            | 8             | 0           | -4.698128               | -0.876071 | -0.368756 |
| 14            | 6             | 0           | -3.663717               | -0.572608 | 0.209371  |
| 15            | 6             | 0           | -3.642711               | -0.137941 | 1.667878  |
| 16            | 8             | 0           | 1.423230                | 2.381240  | -0.603225 |
| 17            | 6             | 0           | 1.328799                | 3.610732  | 0.101318  |
| 18            | 1             | 0           | 0.838548                | 1.415844  | 1.143480  |
| 19            | 1             | 0           | -0.580338               | 1.055071  | -1.521482 |
| 20            | 1             | 0           | -1.161037               | -0.312392 | 1.145862  |
| 21            | 1             | 0           | 1.920211                | -0.002116 | -1.349819 |
| 22            | 1             | 0           | 3.589928                | 1.100507  | 0.054000  |
| 23            | 1             | 0           | 2.925934                | 0.351453  | 1.515382  |
| 24            | 1             | 0           | 0.417515                | -2.245938 | -2.029028 |
| 25            | 1             | 0           | -2.239027               | 2.060052  | -0.402356 |
| 26            | 1             | 0           | -2.517228               | -0.922370 | -1.416049 |
| 27            | 1             | 0           | -3.110596               | 0.809555  | 1.798351  |
| 28            | 1             | 0           | -4.676572               | -0.033291 | 1.998669  |
| 29            | 1             | 0           | -3.148396               | -0.889190 | 2.296270  |

|    |    |   |          |           |           |
|----|----|---|----------|-----------|-----------|
| 30 | 1  | 0 | 1.850362 | 4.353889  | -0.508125 |
| 31 | 1  | 0 | 0.286997 | 3.918080  | 0.244273  |
| 32 | 1  | 0 | 1.824659 | 3.547866  | 1.081758  |
| 33 | 11 | 0 | 2.894796 | -2.610576 | 0.718099  |

-----

SCF Done: E(RB+HF-LYP) = -1021.25485034

|                                          |                             |
|------------------------------------------|-----------------------------|
| Zero-point correction=                   | 0.264095 (Hartree/Particle) |
| Thermal correction to Energy=            | 0.282995                    |
| Thermal correction to Enthalpy=          | 0.283939                    |
| Thermal correction to Gibbs Free Energy= | 0.216143                    |

|                |           |           |           |
|----------------|-----------|-----------|-----------|
| Frequencies -- | 35.3626   | 40.2706   | 53.5824   |
| Frequencies -- | 60.4894   | 71.1775   | 82.7570   |
| Frequencies -- | 124.2996  | 138.5765  | 160.6376  |
| Frequencies -- | 162.8664  | 170.4149  | 192.2096  |
| Frequencies -- | 196.1111  | 235.2143  | 256.2106  |
| Frequencies -- | 267.6140  | 285.0724  | 310.9016  |
| Frequencies -- | 319.8971  | 345.4277  | 377.3958  |
| Frequencies -- | 379.4030  | 421.3695  | 441.5132  |
| Frequencies -- | 468.1949  | 491.8403  | 496.9169  |
| Frequencies -- | 550.0866  | 558.8910  | 604.5390  |
| Frequencies -- | 618.9181  | 633.3220  | 663.0011  |
| Frequencies -- | 775.8291  | 816.1318  | 848.8971  |
| Frequencies -- | 936.3685  | 965.4817  | 993.4987  |
| Frequencies -- | 1029.0238 | 1046.4977 | 1057.9015 |
| Frequencies -- | 1069.7780 | 1079.1140 | 1103.4041 |
| Frequencies -- | 1113.8655 | 1129.2759 | 1144.6317 |
| Frequencies -- | 1156.7429 | 1167.7838 | 1179.3867 |
| Frequencies -- | 1187.7577 | 1211.5217 | 1227.0406 |
| Frequencies -- | 1228.9894 | 1282.2469 | 1296.0063 |
| Frequencies -- | 1308.8322 | 1340.7508 | 1348.6708 |
| Frequencies -- | 1354.6304 | 1375.0251 | 1384.9976 |
| Frequencies -- | 1403.9963 | 1404.5836 | 1418.8462 |
| Frequencies -- | 1424.3939 | 1447.5980 | 1451.6614 |
| Frequencies -- | 1499.3958 | 1503.4263 | 1511.0269 |
| Frequencies -- | 1514.4167 | 1520.9360 | 1529.9449 |
| Frequencies -- | 1544.0388 | 1794.1875 | 2726.4555 |
| Frequencies -- | 2906.8266 | 2997.4957 | 3012.3372 |
| Frequencies -- | 3016.0855 | 3052.2820 | 3057.9695 |
| Frequencies -- | 3084.9485 | 3094.9641 | 3121.8341 |
| Frequencies -- | 3125.4610 | 3139.9556 | 3179.5677 |
| Frequencies -- | 3582.0488 | 3739.1906 | 3743.7466 |

GlcNHSO<sub>3</sub>H, 4-OMe, alpha anomer

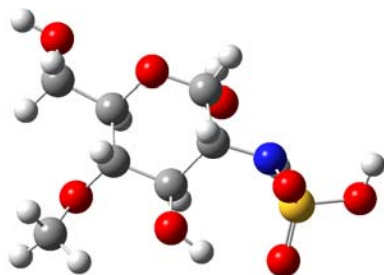

Standard orientation:

| Center Number | Atomic Number | Atomic Type | Coordinates (Angstroms) |           |           |
|---------------|---------------|-------------|-------------------------|-----------|-----------|
|               |               |             | X                       | Y         | Z         |
| 1             | 6             | 0           | 1.650047                | 0.863658  | 0.148590  |
| 2             | 6             | 0           | 0.182937                | 0.712194  | -0.290430 |
| 3             | 6             | 0           | -0.455603               | -0.547798 | 0.341587  |
| 4             | 6             | 0           | 0.441669                | -1.781082 | 0.161578  |
| 5             | 8             | 0           | 1.742833                | -1.531370 | 0.613692  |
| 6             | 6             | 0           | 2.419099                | -0.452951 | -0.055874 |
| 7             | 8             | 0           | -0.504537               | 1.887532  | 0.111454  |
| 8             | 8             | 0           | 0.391716                | -2.119720 | -1.213547 |
| 9             | 1             | 0           | 0.077180                | -2.609164 | 0.780951  |
| 10            | 6             | 0           | 3.831109                | -0.402480 | 0.498935  |
| 11            | 8             | 0           | 4.529526                | -1.548255 | 0.026532  |
| 12            | 8             | 0           | 2.317102                | 1.851306  | -0.619952 |
| 13            | 6             | 0           | 2.262100                | 3.176616  | -0.104396 |
| 14            | 7             | 0           | -1.782456               | -0.906680 | -0.201771 |
| 15            | 16            | 0           | -3.103560               | 0.064635  | 0.136445  |
| 16            | 8             | 0           | -4.272521               | -0.921919 | -0.428525 |
| 17            | 8             | 0           | -3.198410               | 0.187593  | 1.581810  |
| 18            | 8             | 0           | -3.194383               | 1.234709  | -0.736035 |
| 19            | 1             | 0           | 1.663295                | 1.130410  | 1.218073  |
| 20            | 1             | 0           | 0.179250                | 0.608064  | -1.385181 |
| 21            | 1             | 0           | -0.581079               | -0.372859 | 1.413511  |
| 22            | 1             | 0           | 2.478832                | -0.663012 | -1.130698 |
| 23            | 1             | 0           | -1.329521               | 1.969126  | -0.400322 |
| 24            | 1             | 0           | 0.961313                | -2.895617 | -1.343741 |
| 25            | 1             | 0           | 4.296780                | 0.529499  | 0.152076  |
| 26            | 1             | 0           | 3.780306                | -0.384493 | 1.599227  |
| 27            | 1             | 0           | 5.428099                | -1.514192 | 0.386752  |
| 28            | 1             | 0           | 2.884585                | 3.786497  | -0.764880 |
| 29            | 1             | 0           | 1.239642                | 3.564124  | -0.091785 |
| 30            | 1             | 0           | 2.674601                | 3.222903  | 0.915378  |
| 31            | 1             | 0           | -1.739966               | -1.118591 | -1.199011 |
| 32            | 1             | 0           | -4.357923               | -1.668034 | 0.195555  |

-----  
SCF Done: E(RB+HF-LYP) = -1330.71846378

Zero-point correction= 0.253289 (Hartree/Particle)

Thermal correction to Energy= 0.271477

Thermal correction to Enthalpy= 0.272421

Thermal correction to Gibbs Free Energy= 0.206980

|                |           |           |           |
|----------------|-----------|-----------|-----------|
| Frequencies -- | 37.9452   | 48.9864   | 66.0169   |
| Frequencies -- | 72.4344   | 95.5281   | 108.1438  |
| Frequencies -- | 121.3913  | 150.0574  | 165.5489  |
| Frequencies -- | 191.4367  | 211.6998  | 213.4664  |
| Frequencies -- | 231.5167  | 255.7332  | 265.3778  |
| Frequencies -- | 310.3056  | 323.0254  | 338.1829  |
| Frequencies -- | 369.1302  | 378.3030  | 385.2558  |
| Frequencies -- | 407.8104  | 433.0025  | 448.8851  |
| Frequencies -- | 471.9110  | 479.5451  | 524.6643  |
| Frequencies -- | 542.1178  | 553.4537  | 597.2921  |
| Frequencies -- | 619.3122  | 629.7432  | 704.0570  |
| Frequencies -- | 785.0386  | 814.0682  | 862.2324  |
| Frequencies -- | 884.7169  | 935.5741  | 983.7116  |
| Frequencies -- | 1018.1372 | 1061.3011 | 1061.9765 |
| Frequencies -- | 1084.8327 | 1099.8714 | 1102.8159 |
| Frequencies -- | 1108.8885 | 1133.9889 | 1148.0523 |
| Frequencies -- | 1152.1196 | 1160.2189 | 1162.7874 |
| Frequencies -- | 1187.1525 | 1192.6630 | 1214.7352 |
| Frequencies -- | 1226.4860 | 1230.5881 | 1270.9153 |
| Frequencies -- | 1277.4129 | 1294.2736 | 1329.7667 |
| Frequencies -- | 1336.7114 | 1361.1130 | 1372.8846 |
| Frequencies -- | 1387.3790 | 1391.2555 | 1404.0508 |
| Frequencies -- | 1417.6492 | 1447.1769 | 1456.8410 |
| Frequencies -- | 1466.9691 | 1483.5346 | 1498.7632 |
| Frequencies -- | 1510.9643 | 1543.6764 | 1546.8180 |
| Frequencies -- | 2998.9202 | 3005.4146 | 3012.6053 |
| Frequencies -- | 3032.4309 | 3062.0848 | 3070.6732 |
| Frequencies -- | 3074.9638 | 3108.1847 | 3121.9990 |
| Frequencies -- | 3149.4603 | 3510.4696 | 3678.0198 |
| Frequencies -- | 3694.7198 | 3739.4346 | 3760.3224 |



GlcNH2, 4-OMe, alpha anomer

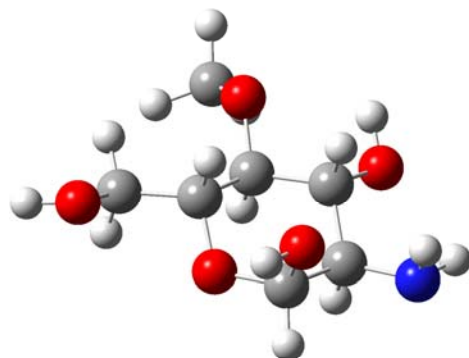

Standard orientation:

| Center Number | Atomic Number | Atomic Type | Coordinates (Angstroms) |           |           |
|---------------|---------------|-------------|-------------------------|-----------|-----------|
|               |               |             | X                       | Y         | Z         |
| 1             | 6             | 0           | -0.470173               | 0.825487  | -0.140609 |
| 2             | 6             | 0           | 1.007089                | 0.939712  | 0.245322  |
| 3             | 6             | 0           | 1.853833                | -0.084318 | -0.524493 |
| 4             | 6             | 0           | 1.249898                | -1.481514 | -0.341270 |
| 5             | 8             | 0           | -0.127233               | -1.506912 | -0.665109 |
| 6             | 6             | 0           | -0.947345               | -0.616330 | 0.107117  |
| 7             | 8             | 0           | 1.511205                | 2.237284  | -0.052205 |
| 8             | 8             | 0           | 1.485554                | -1.872963 | 0.997253  |
| 9             | 1             | 0           | 1.712132                | -2.186495 | -1.041562 |
| 10            | 6             | 0           | -2.388421               | -0.873521 | -0.293958 |
| 11            | 8             | 0           | -2.760016               | -2.156464 | 0.193218  |
| 12            | 8             | 0           | -1.195166               | 1.776680  | 0.647340  |
| 13            | 6             | 0           | -2.054120               | 2.634762  | -0.086321 |
| 14            | 7             | 0           | 3.274889                | -0.102566 | -0.192227 |
| 15            | 1             | 0           | -0.572545               | 1.064654  | -1.209191 |
| 16            | 1             | 0           | 1.092254                | 0.737758  | 1.324569  |
| 17            | 1             | 0           | 1.765078                | 0.158541  | -1.591582 |
| 18            | 1             | 0           | -0.845138               | -0.845841 | 1.175746  |
| 19            | 1             | 0           | 0.969144                | 2.853049  | 0.467526  |
| 20            | 1             | 0           | 1.131611                | -2.771211 | 1.100338  |
| 21            | 1             | 0           | -3.015984               | -0.084406 | 0.146476  |
| 22            | 1             | 0           | -2.471112               | -0.816494 | -1.390804 |
| 23            | 1             | 0           | -3.653454               | -2.347497 | -0.128706 |
| 24            | 1             | 0           | -2.500764               | 3.324051  | 0.635712  |
| 25            | 1             | 0           | -1.501033               | 3.213047  | -0.840602 |
| 26            | 1             | 0           | -2.861009               | 2.084306  | -0.591311 |
| 27            | 1             | 0           | 3.379568                | -0.403873 | 0.775873  |
| 28            | 1             | 0           | 3.627704                | 0.851707  | -0.245592 |

SCF Done: E(RB+HF-LYP) = -706.830273838

Zero-point correction=

0.238765 (Hartree/Particle)

|                                          |          |
|------------------------------------------|----------|
| Thermal correction to Energy=            | 0.252911 |
| Thermal correction to Enthalpy=          | 0.253855 |
| Thermal correction to Gibbs Free Energy= | 0.198735 |

|                |           |           |           |
|----------------|-----------|-----------|-----------|
| Frequencies -- | 63.4147   | 76.4659   | 100.6662  |
| Frequencies -- | 117.2495  | 144.4539  | 168.9687  |
| Frequencies -- | 192.2864  | 216.8371  | 240.3341  |
| Frequencies -- | 256.9860  | 259.2395  | 286.8414  |
| Frequencies -- | 319.0264  | 342.3093  | 359.3106  |
| Frequencies -- | 383.9786  | 403.2799  | 417.3989  |
| Frequencies -- | 446.1732  | 462.6008  | 509.1895  |
| Frequencies -- | 570.6251  | 603.5597  | 634.3601  |
| Frequencies -- | 770.9028  | 855.6511  | 885.4925  |
| Frequencies -- | 930.0255  | 985.4352  | 1019.1606 |
| Frequencies -- | 1042.9389 | 1062.1863 | 1078.2867 |
| Frequencies -- | 1091.8780 | 1106.9635 | 1120.0612 |
| Frequencies -- | 1123.2245 | 1152.2732 | 1160.8880 |
| Frequencies -- | 1179.9908 | 1190.4082 | 1204.3052 |
| Frequencies -- | 1215.5741 | 1227.5807 | 1242.8087 |
| Frequencies -- | 1280.3741 | 1298.3063 | 1302.1010 |
| Frequencies -- | 1351.6078 | 1369.4427 | 1385.9908 |
| Frequencies -- | 1393.9773 | 1405.1627 | 1424.2648 |
| Frequencies -- | 1430.6096 | 1443.6951 | 1471.1066 |
| Frequencies -- | 1486.7132 | 1504.1364 | 1520.0156 |
| Frequencies -- | 1538.0886 | 1542.2573 | 1689.6336 |
| Frequencies -- | 3001.3198 | 3008.6048 | 3011.8056 |
| Frequencies -- | 3030.2904 | 3039.5781 | 3054.9677 |
| Frequencies -- | 3063.1156 | 3063.8300 | 3078.4598 |
| Frequencies -- | 3134.7755 | 3470.7805 | 3558.4911 |
| Frequencies -- | 3732.6674 | 3738.5413 | 3759.3344 |

GlcNHSO3H, 4-OMe, alpha anomer, TS to lose N-sulfate

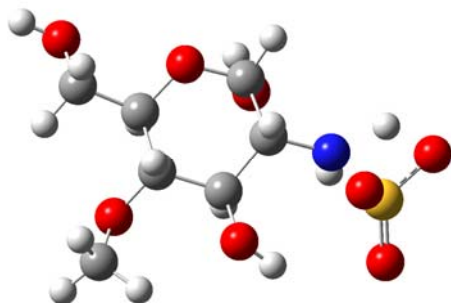

Standard orientation:

| Center Number | Atomic Number | Atomic Type | Coordinates (Angstroms) |           |           |
|---------------|---------------|-------------|-------------------------|-----------|-----------|
|               |               |             | X                       | Y         | Z         |
| 1             | 6             | 0           | 1.622315                | 0.877333  | 0.131318  |
| 2             | 6             | 0           | 0.186551                | 0.680992  | -0.383363 |
| 3             | 6             | 0           | -0.444506               | -0.580772 | 0.246896  |
| 4             | 6             | 0           | 0.474731                | -1.799642 | 0.080073  |
| 5             | 8             | 0           | 1.749712                | -1.526180 | 0.589119  |
| 6             | 6             | 0           | 2.432289                | -0.422936 | -0.033596 |
| 7             | 8             | 0           | -0.560190               | 1.845443  | -0.061812 |
| 8             | 8             | 0           | 0.477455                | -2.117680 | -1.297542 |
| 9             | 1             | 0           | 0.106772                | -2.643212 | 0.677590  |
| 10            | 6             | 0           | 3.809870                | -0.341591 | 0.599264  |
| 11            | 8             | 0           | 4.560369                | -1.464089 | 0.154479  |
| 12            | 8             | 0           | 2.298004                | 1.877155  | -0.610053 |
| 13            | 6             | 0           | 2.199631                | 3.200732  | -0.093598 |
| 14            | 7             | 0           | -1.762872               | -0.874661 | -0.344411 |
| 15            | 16            | 0           | -3.255115               | 0.081206  | 0.187733  |
| 16            | 8             | 0           | -3.949455               | -1.306679 | 0.103692  |
| 17            | 8             | 0           | -3.028154               | 0.556150  | 1.542934  |
| 18            | 8             | 0           | -3.599133               | 1.026905  | -0.873886 |
| 19            | 1             | 0           | 1.574582                | 1.147827  | 1.198610  |
| 20            | 1             | 0           | 0.250406                | 0.544433  | -1.472939 |
| 21            | 1             | 0           | -0.600796               | -0.406950 | 1.314918  |
| 22            | 1             | 0           | 2.557444                | -0.622057 | -1.104881 |
| 23            | 1             | 0           | -1.330406               | 1.922885  | -0.649368 |
| 24            | 1             | 0           | 1.071886                | -2.875973 | -1.422457 |
| 25            | 1             | 0           | 4.269757                | 0.605585  | 0.287147  |
| 26            | 1             | 0           | 3.697849                | -0.336416 | 1.695050  |
| 27            | 1             | 0           | 5.434279                | -1.418817 | 0.569972  |
| 28            | 1             | 0           | 2.828039                | 3.824613  | -0.734617 |
| 29            | 1             | 0           | 1.169236                | 3.566688  | -0.111954 |
| 30            | 1             | 0           | 2.580542                | 3.252934  | 0.937702  |
| 31            | 1             | 0           | -1.708559               | -0.841368 | -1.367089 |

32            1            0            -2.753240    -1.709716    -0.067951

-----  
SCF Done: E(RB+HF-LYP) = -1330.67133745

Zero-point correction=                    0.249138 (Hartree/Particle)  
Thermal correction to Energy=            0.267037  
Thermal correction to Enthalpy=         0.267981  
Thermal correction to Gibbs Free Energy= 0.202733

|                |            |           |           |
|----------------|------------|-----------|-----------|
| Frequencies -- | -1684.8604 | 38.8979   | 50.9342   |
| Frequencies -- | 63.0867    | 73.9874   | 75.8300   |
| Frequencies -- | 95.7319    | 128.0763  | 145.3714  |
| Frequencies -- | 164.8369   | 169.8888  | 205.5139  |
| Frequencies -- | 223.5120   | 243.0024  | 258.0533  |
| Frequencies -- | 265.5291   | 306.4465  | 315.4015  |
| Frequencies -- | 367.7181   | 374.1715  | 389.6911  |
| Frequencies -- | 414.3109   | 425.9616  | 437.6093  |
| Frequencies -- | 451.6477   | 471.4453  | 490.4629  |
| Frequencies -- | 514.1189   | 554.2029  | 611.1363  |
| Frequencies -- | 617.5251   | 649.3924  | 731.9905  |
| Frequencies -- | 789.2314   | 864.6467  | 908.0164  |
| Frequencies -- | 932.2042   | 953.0696  | 987.8614  |
| Frequencies -- | 1018.9500  | 1059.7154 | 1063.2355 |
| Frequencies -- | 1083.4409  | 1101.9265 | 1107.8853 |
| Frequencies -- | 1114.9699  | 1135.1779 | 1146.8470 |
| Frequencies -- | 1159.0065  | 1162.9465 | 1187.6140 |
| Frequencies -- | 1194.1386  | 1211.9103 | 1217.6777 |
| Frequencies -- | 1225.9001  | 1234.1319 | 1271.7522 |
| Frequencies -- | 1288.3608  | 1326.3376 | 1328.8146 |
| Frequencies -- | 1344.4121  | 1358.1574 | 1374.5636 |
| Frequencies -- | 1388.0093  | 1389.9730 | 1408.3449 |
| Frequencies -- | 1419.8774  | 1448.3537 | 1452.6805 |
| Frequencies -- | 1484.2075  | 1485.7033 | 1499.8092 |
| Frequencies -- | 1512.2034  | 1542.6092 | 1545.9534 |
| Frequencies -- | 1979.3780  | 3002.0894 | 3007.4413 |
| Frequencies -- | 3016.5453  | 3029.3829 | 3060.9497 |
| Frequencies -- | 3061.3480  | 3074.7916 | 3110.2574 |
| Frequencies -- | 3124.7306  | 3151.4805 | 3464.7850 |
| Frequencies -- | 3721.6996  | 3737.0034 | 3761.0276 |

GlcNHSO3H, 6-OSO3 anion, 4-OMe, alpha anomer

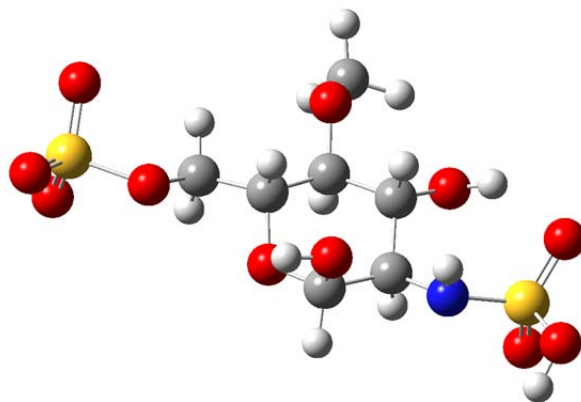

Standard orientation:

| Center Number | Atomic Number | Atomic Type | Coordinates (Angstroms) |           |           |
|---------------|---------------|-------------|-------------------------|-----------|-----------|
|               |               |             | X                       | Y         | Z         |
| 1             | 6             | 0           | 0.086163                | 1.253517  | 0.115370  |
| 2             | 6             | 0           | -1.350178               | 0.861605  | -0.270263 |
| 3             | 6             | 0           | -1.759508               | -0.482618 | 0.370098  |
| 4             | 6             | 0           | -0.667392               | -1.550591 | 0.186987  |
| 5             | 8             | 0           | 0.575408                | -1.076806 | 0.583120  |
| 6             | 6             | 0           | 1.053234                | 0.085811  | -0.136302 |
| 7             | 8             | 0           | -2.223058               | 1.906265  | 0.150754  |
| 8             | 8             | 0           | -0.704769               | -1.940444 | -1.181456 |
| 9             | 1             | 0           | -0.873112               | -2.413119 | 0.834410  |
| 10            | 6             | 0           | 2.478576                | 0.340626  | 0.320837  |
| 11            | 8             | 0           | 3.273526                | -0.720601 | -0.164966 |
| 12            | 8             | 0           | 0.504413                | 2.353263  | -0.679028 |
| 13            | 6             | 0           | 0.422528                | 3.619943  | -0.048491 |
| 14            | 7             | 0           | -3.012000               | -1.060112 | -0.171228 |
| 15            | 16            | 0           | -4.477561               | -0.327878 | 0.138239  |
| 16            | 8             | 0           | -5.448469               | -1.531219 | -0.405009 |
| 17            | 8             | 0           | -4.613748               | -0.190228 | 1.579992  |
| 18            | 8             | 0           | -4.793301               | 0.783932  | -0.758819 |
| 19            | 1             | 0           | 0.106423                | 1.514092  | 1.184669  |
| 20            | 1             | 0           | -1.368709               | 0.758893  | -1.364566 |
| 21            | 1             | 0           | -1.909072               | -0.328393 | 1.441889  |
| 22            | 1             | 0           | 1.072598                | -0.133086 | -1.210147 |
| 23            | 1             | 0           | -3.028089               | 1.883226  | -0.394304 |
| 24            | 1             | 0           | 0.104872                | -2.455017 | -1.341238 |
| 25            | 1             | 0           | 2.814205                | 1.300723  | -0.091395 |
| 26            | 1             | 0           | 2.516330                | 0.393275  | 1.419151  |
| 27            | 1             | 0           | 0.816751                | 4.346854  | -0.764849 |

|    |    |   |           |           |           |
|----|----|---|-----------|-----------|-----------|
| 28 | 1  | 0 | -0.611627 | 3.879278  | 0.207686  |
| 29 | 1  | 0 | 1.040586  | 3.655730  | 0.861573  |
| 30 | 1  | 0 | -2.921354 | -1.278646 | -1.164026 |
| 31 | 1  | 0 | -5.306361 | -2.297768 | 0.182204  |
| 32 | 16 | 0 | 4.966280  | -0.466758 | 0.051463  |
| 33 | 8  | 0 | 5.112317  | -0.324631 | 1.517047  |
| 34 | 8  | 0 | 5.489181  | -1.712447 | -0.533021 |
| 35 | 8  | 0 | 5.232314  | 0.770311  | -0.717001 |

-----

SCF Done: E(RB+HF-LYP) = -1954.10618642

Zero-point correction= 0.256212 (Hartree/Particle)  
 Thermal correction to Energy= 0.278010  
 Thermal correction to Enthalpy= 0.278954  
 Thermal correction to Gibbs Free Energy= 0.201927

|                |           |           |           |
|----------------|-----------|-----------|-----------|
| Frequencies -- | 7.0774    | 26.1089   | 31.6093   |
| Frequencies -- | 52.1429   | 54.6742   | 69.2009   |
| Frequencies -- | 84.4672   | 110.5686  | 116.5655  |
| Frequencies -- | 130.8122  | 144.6856  | 165.7590  |
| Frequencies -- | 179.7668  | 205.1773  | 224.4273  |
| Frequencies -- | 235.3621  | 249.2620  | 283.8069  |
| Frequencies -- | 306.3363  | 328.2859  | 353.5207  |
| Frequencies -- | 366.3821  | 371.9406  | 374.6765  |
| Frequencies -- | 402.8133  | 426.1430  | 445.7096  |
| Frequencies -- | 449.3779  | 471.3005  | 473.0161  |
| Frequencies -- | 506.3831  | 525.4162  | 532.7907  |
| Frequencies -- | 540.0181  | 542.3385  | 567.0098  |
| Frequencies -- | 587.3523  | 619.4067  | 629.2446  |
| Frequencies -- | 705.6536  | 718.7139  | 783.6977  |
| Frequencies -- | 808.5594  | 857.7687  | 887.2773  |
| Frequencies -- | 929.3318  | 990.2686  | 999.7897  |
| Frequencies -- | 1024.6101 | 1060.5806 | 1071.6757 |
| Frequencies -- | 1088.9716 | 1094.0836 | 1106.6958 |
| Frequencies -- | 1116.5182 | 1130.3723 | 1148.4765 |
| Frequencies -- | 1159.5831 | 1160.6474 | 1169.3022 |
| Frequencies -- | 1188.4625 | 1201.3310 | 1224.4471 |
| Frequencies -- | 1229.3829 | 1235.5793 | 1241.6598 |
| Frequencies -- | 1271.2691 | 1273.0064 | 1279.4124 |
| Frequencies -- | 1324.2685 | 1332.2631 | 1356.5385 |
| Frequencies -- | 1365.9040 | 1377.3218 | 1386.4983 |
| Frequencies -- | 1403.2386 | 1412.4828 | 1432.9552 |
| Frequencies -- | 1448.4548 | 1454.3456 | 1462.2259 |
| Frequencies -- | 1499.6462 | 1514.8514 | 1537.6941 |
| Frequencies -- | 1544.5378 | 3009.4589 | 3016.6969 |
| Frequencies -- | 3021.3156 | 3036.4627 | 3049.8604 |
| Frequencies -- | 3071.3031 | 3081.9170 | 3084.2635 |
| Frequencies -- | 3123.5198 | 3130.6388 | 3507.1085 |
| Frequencies -- | 3698.2942 | 3706.3992 | 3725.4074 |

GlcNH2, 6-OSO3 anion, 4-OMe, alpha anomer

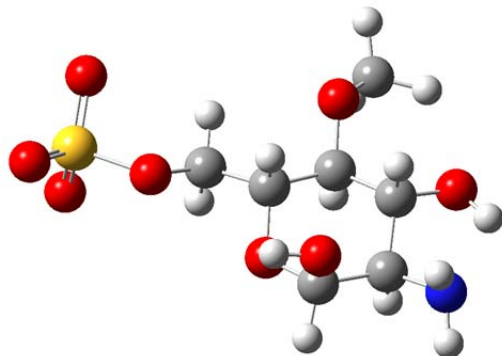

| Center Number | Atomic Number | Atomic Type | Coordinates (Angstroms) |           |           |
|---------------|---------------|-------------|-------------------------|-----------|-----------|
|               |               |             | X                       | Y         | Z         |
| 1             | 6             | 0           | -1.370227               | 1.003006  | 0.164469  |
| 2             | 6             | 0           | -2.742873               | 0.410480  | -0.172922 |
| 3             | 6             | 0           | -2.957755               | -0.945591 | 0.515676  |
| 4             | 6             | 0           | -1.769795               | -1.882958 | 0.267975  |
| 5             | 8             | 0           | -0.561496               | -1.262113 | 0.588315  |
| 6             | 6             | 0           | -0.273704               | -0.039772 | -0.129578 |
| 7             | 6             | 0           | 1.121783                | 0.397630  | 0.283201  |
| 8             | 8             | 0           | -1.832756               | -2.308935 | -1.087393 |
| 9             | 1             | 0           | -1.820130               | -2.755458 | 0.937997  |
| 10            | 7             | 0           | -4.274551               | -1.458916 | 0.102272  |
| 11            | 8             | 0           | 2.037378                | -0.547429 | -0.234054 |
| 12            | 8             | 0           | -3.787350               | 1.295147  | 0.223596  |
| 13            | 16            | 0           | 3.685223                | -0.120825 | 0.022051  |
| 14            | 8             | 0           | 3.801150                | -0.032595 | 1.495246  |
| 15            | 8             | 0           | 4.352037                | -1.272651 | -0.608350 |
| 16            | 8             | 0           | 3.827264                | 1.172842  | -0.684275 |
| 17            | 8             | 0           | -1.094807               | 2.144691  | -0.635566 |
| 18            | 6             | 0           | -1.527234               | 3.378947  | -0.092704 |
| 19            | 1             | 0           | -1.343720               | 1.268663  | 1.233902  |
| 20            | 1             | 0           | -2.767938               | 0.262194  | -1.264673 |
| 21            | 1             | 0           | -2.998545               | -0.757078 | 1.595540  |
| 22            | 1             | 0           | -0.266956               | -0.243206 | -1.207391 |
| 23            | 1             | 0           | 1.317457                | 1.395636  | -0.127585 |
| 24            | 1             | 0           | 1.186042                | 0.446370  | 1.380294  |
| 25            | 1             | 0           | -0.966156               | -2.704366 | -1.282810 |
| 26            | 1             | 0           | -4.171137               | -1.867191 | -0.827476 |
| 27            | 1             | 0           | -4.561040               | -2.220474 | 0.715921  |
| 28            | 1             | 0           | -4.585863               | 0.734362  | 0.183795  |
| 29            | 1             | 0           | -1.164933               | 4.158137  | -0.770434 |
| 30            | 1             | 0           | -2.619599               | 3.433416  | -0.016904 |
| 31            | 1             | 0           | -1.091724               | 3.552493  | 0.904245  |

-----  
SCF Done: E(RB+HF-LYP) = -1330.21579430

Zero-point correction= 0.241997 (Hartree/Particle)  
Thermal correction to Energy= 0.259576  
Thermal correction to Enthalpy= 0.260520  
Thermal correction to Gibbs Free Energy= 0.194299

|                |           |           |           |
|----------------|-----------|-----------|-----------|
| Frequencies -- | 14.3766   | 34.1452   | 37.4234   |
| Frequencies -- | 63.0430   | 88.7963   | 98.2128   |
| Frequencies -- | 123.9139  | 151.8480  | 168.7938  |
| Frequencies -- | 183.1243  | 232.7465  | 237.1363  |
| Frequencies -- | 250.7605  | 282.7220  | 307.9188  |
| Frequencies -- | 328.6557  | 363.0579  | 368.8753  |
| Frequencies -- | 374.6283  | 393.7026  | 428.4670  |
| Frequencies -- | 443.4080  | 450.2598  | 495.3522  |
| Frequencies -- | 522.8568  | 541.4615  | 559.5812  |
| Frequencies -- | 567.3188  | 571.0629  | 617.5633  |
| Frequencies -- | 636.8671  | 719.6654  | 779.3246  |
| Frequencies -- | 857.1058  | 890.4803  | 955.5813  |
| Frequencies -- | 985.2011  | 999.3820  | 1025.6760 |
| Frequencies -- | 1026.8298 | 1075.9868 | 1084.2296 |
| Frequencies -- | 1102.1348 | 1113.1857 | 1120.2085 |
| Frequencies -- | 1141.5706 | 1157.2806 | 1162.3295 |
| Frequencies -- | 1172.1208 | 1191.7254 | 1205.4809 |
| Frequencies -- | 1224.0782 | 1232.2296 | 1236.2932 |
| Frequencies -- | 1258.8076 | 1269.9857 | 1283.7108 |
| Frequencies -- | 1328.0666 | 1349.8787 | 1363.6591 |
| Frequencies -- | 1369.8763 | 1392.6181 | 1395.4829 |
| Frequencies -- | 1413.6209 | 1420.5019 | 1432.8602 |
| Frequencies -- | 1458.3194 | 1472.5278 | 1501.6529 |
| Frequencies -- | 1513.3160 | 1540.1135 | 1546.2199 |
| Frequencies -- | 1696.1120 | 2994.0784 | 3001.7955 |
| Frequencies -- | 3004.9640 | 3008.0164 | 3022.2280 |
| Frequencies -- | 3064.9429 | 3069.2942 | 3082.4120 |
| Frequencies -- | 3085.4762 | 3126.6169 | 3458.9877 |
| Frequencies -- | 3542.7211 | 3635.8856 | 3723.6526 |



GlcNHSO3H, 6-OSO3 anion, 4-OMe, alpha anomer, TS to lose N-sulfate

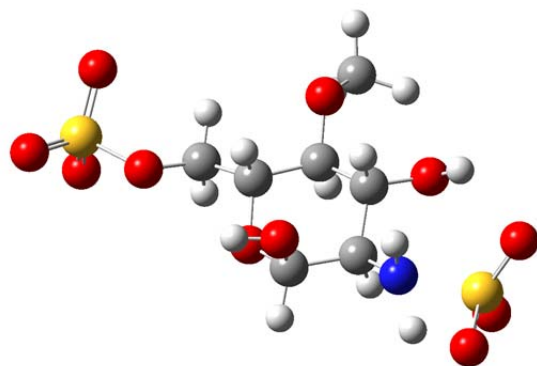

Standard orientation:

| Center<br>Number | Atomic<br>Number | Atomic<br>Type | Coordinates (Angstroms) |           |           |
|------------------|------------------|----------------|-------------------------|-----------|-----------|
|                  |                  |                | X                       | Y         | Z         |
| 1                | 6                | 0              | 0.083129                | 1.217876  | 0.085284  |
| 2                | 6                | 0              | -1.335048               | 0.821574  | -0.354774 |
| 3                | 6                | 0              | -1.758761               | -0.517478 | 0.282690  |
| 4                | 6                | 0              | -0.669783               | -1.589479 | 0.095876  |
| 5                | 8                | 0              | 0.562353                | -1.125089 | 0.532850  |
| 6                | 6                | 0              | 1.061793                | 0.053839  | -0.146724 |
| 7                | 8                | 0              | -2.233874               | 1.865498  | 0.008755  |
| 8                | 8                | 0              | -0.685841               | -1.945016 | -1.279296 |
| 9                | 1                | 0              | -0.889293               | -2.465626 | 0.721451  |
| 10               | 6                | 0              | 2.467116                | 0.307638  | 0.368992  |
| 11               | 8                | 0              | 3.286145                | -0.740862 | -0.100220 |
| 12               | 8                | 0              | 0.517542                | 2.324110  | -0.688297 |
| 13               | 6                | 0              | 0.446261                | 3.581593  | -0.036476 |
| 14               | 7                | 0              | -3.024763               | -1.013732 | -0.296843 |
| 15               | 16               | 0              | -4.641356               | -0.295294 | 0.194775  |
| 16               | 8                | 0              | -5.118645               | -1.779048 | 0.136980  |
| 17               | 8                | 0              | -4.530753               | 0.235743  | 1.544452  |
| 18               | 8                | 0              | -5.134288               | 0.558244  | -0.888006 |
| 19               | 1                | 0              | 0.065314                | 1.469504  | 1.156481  |
| 20               | 1                | 0              | -1.303357               | 0.702827  | -1.447511 |
| 21               | 1                | 0              | -1.925960               | -0.370579 | 1.352804  |
| 22               | 1                | 0              | 1.124064                | -0.145574 | -1.222593 |
| 23               | 1                | 0              | -2.981391               | 1.881116  | -0.610002 |
| 24               | 1                | 0              | 0.124388                | -2.458915 | -1.439813 |
| 25               | 1                | 0              | 2.810899                | 1.275105  | -0.018901 |
| 26               | 1                | 0              | 2.461097                | 0.347765  | 1.468740  |
| 27               | 1                | 0              | 0.843629                | 4.316808  | -0.742067 |
| 28               | 1                | 0              | -0.585958               | 3.844082  | 0.225345  |
| 29               | 1                | 0              | 1.066473                | 3.597774  | 0.872135  |

|    |    |   |           |           |           |
|----|----|---|-----------|-----------|-----------|
| 30 | 1  | 0 | -2.964964 | -0.993292 | -1.319785 |
| 31 | 16 | 0 | 4.975064  | -0.423599 | 0.083058  |
| 32 | 8  | 0 | 5.132669  | -0.226906 | 1.540757  |
| 33 | 8  | 0 | 5.530795  | -1.669716 | -0.467987 |
| 34 | 8  | 0 | 5.186416  | 0.795472  | -0.729796 |
| 35 | 1  | 0 | -3.879333 | -1.995404 | -0.014451 |

-----

SCF Done: E(RB+HF-LYP) = -1954.06250568

Zero-point correction= 0.252054 (Hartree/Particle)  
Thermal correction to Energy= 0.273569  
Thermal correction to Enthalpy= 0.274513  
Thermal correction to Gibbs Free Energy= 0.198081

|                |            |           |           |
|----------------|------------|-----------|-----------|
| Frequencies -- | -1672.0866 | 11.8654   | 26.2444   |
| Frequencies -- | 31.7916    | 52.7747   | 53.6670   |
| Frequencies -- | 61.4778    | 76.3023   | 91.3741   |
| Frequencies -- | 120.7752   | 129.4516  | 143.7002  |
| Frequencies -- | 167.1189   | 175.3353  | 198.5371  |
| Frequencies -- | 229.1910   | 238.1646  | 258.4382  |
| Frequencies -- | 267.9940   | 300.9045  | 349.7993  |
| Frequencies -- | 360.2794   | 366.0046  | 372.2933  |
| Frequencies -- | 382.3212   | 413.4842  | 427.0080  |
| Frequencies -- | 449.5271   | 452.9708  | 467.5815  |
| Frequencies -- | 485.8780   | 504.2004  | 526.3405  |
| Frequencies -- | 540.2739   | 547.5142  | 576.6867  |
| Frequencies -- | 607.3126   | 623.8512  | 652.0427  |
| Frequencies -- | 714.5521   | 738.6900  | 793.2866  |
| Frequencies -- | 859.4472   | 910.6472  | 926.6945  |
| Frequencies -- | 950.5201   | 995.2020  | 1000.4921 |
| Frequencies -- | 1026.6437  | 1061.3463 | 1069.7171 |
| Frequencies -- | 1090.5898  | 1102.6264 | 1109.4254 |
| Frequencies -- | 1118.2603  | 1130.1081 | 1158.1705 |
| Frequencies -- | 1159.2554  | 1168.6829 | 1187.7133 |
| Frequencies -- | 1188.4509  | 1219.9463 | 1224.4075 |
| Frequencies -- | 1231.4411  | 1235.3113 | 1241.1438 |
| Frequencies -- | 1274.1645  | 1276.4128 | 1320.1923 |
| Frequencies -- | 1326.6705  | 1340.5101 | 1348.6476 |
| Frequencies -- | 1365.7036  | 1378.1760 | 1386.1695 |
| Frequencies -- | 1405.3711  | 1412.9569 | 1432.5879 |
| Frequencies -- | 1449.2620  | 1450.9041 | 1484.7204 |
| Frequencies -- | 1500.8037  | 1516.2684 | 1535.3309 |
| Frequencies -- | 1542.8435  | 1990.9775 | 3013.1301 |
| Frequencies -- | 3015.4830  | 3022.2471 | 3033.6493 |
| Frequencies -- | 3041.3047  | 3071.5200 | 3082.3206 |
| Frequencies -- | 3084.4345  | 3126.7731 | 3134.0411 |
| Frequencies -- | 3461.9973  | 3723.0172 | 3736.9977 |

GlcNHSO3 anion, 6-sulfate, 4-OMe, alpha anomer

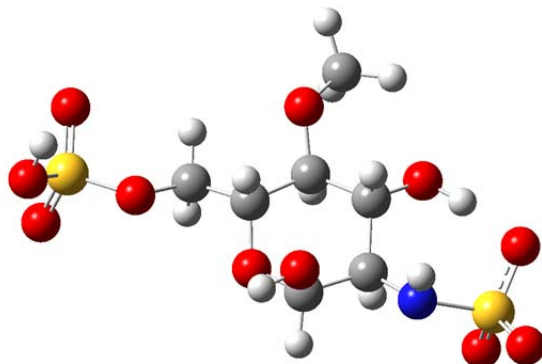

Standard orientation:

| Center Number | Atomic Number | Atomic Type | Coordinates (Angstroms) |           |           |
|---------------|---------------|-------------|-------------------------|-----------|-----------|
|               |               |             | X                       | Y         | Z         |
| 1             | 6             | 0           | 0.036600                | 1.193374  | 0.056882  |
| 2             | 6             | 0           | -1.405657               | 0.867413  | -0.379353 |
| 3             | 6             | 0           | -1.846070               | -0.528425 | 0.151992  |
| 4             | 6             | 0           | -0.765329               | -1.584557 | -0.103827 |
| 5             | 8             | 0           | 0.507298                | -1.180145 | 0.391153  |
| 6             | 6             | 0           | 0.989072                | 0.015242  | -0.212570 |
| 7             | 6             | 0           | 2.357445                | 0.297077  | 0.369693  |
| 8             | 8             | 0           | -0.706073               | -1.839569 | -1.494577 |
| 9             | 1             | 0           | -1.001220               | -2.497382 | 0.452852  |
| 10            | 7             | 0           | -3.102129               | -1.060137 | -0.361973 |
| 11            | 8             | 0           | 3.286626                | -0.714171 | -0.153250 |
| 12            | 8             | 0           | -2.214357               | 1.909706  | 0.111983  |
| 13            | 16            | 0           | -4.607275               | -0.443898 | 0.258609  |
| 14            | 8             | 0           | -5.599767               | -1.309802 | -0.402034 |
| 15            | 8             | 0           | -4.450920               | -0.578050 | 1.720928  |
| 16            | 8             | 0           | -4.689826               | 0.988833  | -0.207548 |
| 17            | 16            | 0           | 4.833361                | -0.542822 | 0.205382  |
| 18            | 8             | 0           | 5.009997                | -0.140855 | 1.596481  |
| 19            | 8             | 0           | 5.503642                | -1.688148 | -0.365076 |
| 20            | 8             | 0           | 5.232509                | 0.769115  | -0.702034 |
| 21            | 8             | 0           | 0.600773                | 2.303617  | -0.640470 |
| 22            | 6             | 0           | 0.171422                | 3.586479  | -0.203228 |
| 23            | 1             | 0           | 0.012147                | 1.403364  | 1.139642  |
| 24            | 1             | 0           | -1.411201               | 0.835365  | -1.484099 |
| 25            | 1             | 0           | -1.965473               | -0.446918 | 1.237887  |
| 26            | 1             | 0           | 1.083338                | -0.114104 | -1.298219 |
| 27            | 1             | 0           | 2.689718                | 1.284511  | 0.044903  |
| 28            | 1             | 0           | 2.348208                | 0.219779  | 1.459076  |
| 29            | 1             | 0           | -0.095522               | -2.583253 | -1.620557 |
| 30            | 1             | 0           | -3.138319               | -1.052818 | -1.379188 |

|    |   |   |           |          |           |
|----|---|---|-----------|----------|-----------|
| 31 | 1 | 0 | -3.174508 | 1.659639 | -0.015187 |
| 32 | 1 | 0 | 5.451413  | 1.480251 | -0.072673 |
| 33 | 1 | 0 | 0.766140  | 4.314890 | -0.765208 |
| 34 | 1 | 0 | -0.894878 | 3.737731 | -0.384683 |
| 35 | 1 | 0 | 0.363582  | 3.723555 | 0.873431  |

-----

SCF Done: E(RB+HF-LYP) = -1954.11348550

Zero-point correction= 0.256010 (Hartree/Particle)  
 Thermal correction to Energy= 0.277641  
 Thermal correction to Enthalpy= 0.278585  
 Thermal correction to Gibbs Free Energy= 0.202694

|                |           |           |           |
|----------------|-----------|-----------|-----------|
| Frequencies -- | 14.4419   | 29.3920   | 33.8765   |
| Frequencies -- | 46.0196   | 56.6402   | 67.9941   |
| Frequencies -- | 93.8494   | 118.9066  | 119.0029  |
| Frequencies -- | 143.2881  | 160.5924  | 168.8377  |
| Frequencies -- | 180.6092  | 187.4569  | 216.7285  |
| Frequencies -- | 237.0429  | 238.7221  | 274.6237  |
| Frequencies -- | 300.1115  | 340.5900  | 345.8438  |
| Frequencies -- | 360.6574  | 370.5683  | 380.9378  |
| Frequencies -- | 394.0651  | 421.6384  | 433.4616  |
| Frequencies -- | 456.5459  | 480.9347  | 490.3021  |
| Frequencies -- | 508.8226  | 518.4961  | 527.6677  |
| Frequencies -- | 550.6990  | 572.0114  | 581.1825  |
| Frequencies -- | 622.9578  | 639.4726  | 675.2152  |
| Frequencies -- | 766.5513  | 788.9624  | 817.5670  |
| Frequencies -- | 828.2766  | 846.6570  | 883.5482  |
| Frequencies -- | 930.0239  | 969.8855  | 977.5174  |
| Frequencies -- | 980.6443  | 1041.1962 | 1051.5657 |
| Frequencies -- | 1076.0992 | 1096.0512 | 1108.0262 |
| Frequencies -- | 1133.6948 | 1139.8344 | 1141.5570 |
| Frequencies -- | 1153.9862 | 1160.0604 | 1167.0154 |
| Frequencies -- | 1178.4209 | 1192.4159 | 1193.5934 |
| Frequencies -- | 1226.5237 | 1231.1759 | 1243.0854 |
| Frequencies -- | 1266.0003 | 1282.5868 | 1297.8759 |
| Frequencies -- | 1334.0650 | 1344.7840 | 1365.5074 |
| Frequencies -- | 1374.5511 | 1392.4021 | 1400.9062 |
| Frequencies -- | 1406.0728 | 1417.7552 | 1435.5139 |
| Frequencies -- | 1448.1448 | 1454.9458 | 1497.0436 |
| Frequencies -- | 1505.3782 | 1519.2238 | 1520.3885 |
| Frequencies -- | 1549.7913 | 2959.5315 | 2989.5913 |
| Frequencies -- | 2999.4863 | 3062.0134 | 3085.6469 |
| Frequencies -- | 3091.2652 | 3096.7604 | 3103.4156 |
| Frequencies -- | 3152.4986 | 3173.1575 | 3181.8725 |
| Frequencies -- | 3525.7304 | 3719.2020 | 3738.2914 |

GlcNHSO3 anion, 4-OMe, alpha anomer

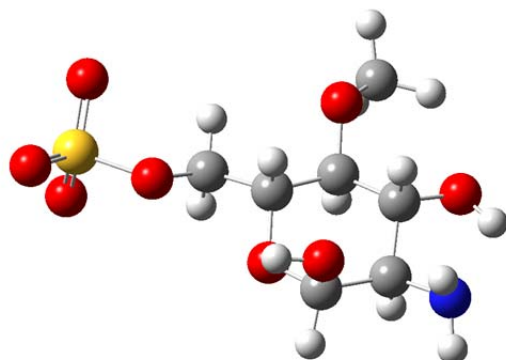

Standard orientation:

| Center Number | Atomic Number | Atomic Type | Coordinates (Angstroms) |           |           |
|---------------|---------------|-------------|-------------------------|-----------|-----------|
|               |               |             | X                       | Y         | Z         |
| 1             | 6             | 0           | 1.611209                | 0.857617  | 0.138374  |
| 2             | 6             | 0           | 0.156398                | 0.735386  | -0.355759 |
| 3             | 6             | 0           | -0.515008               | -0.552941 | 0.198849  |
| 4             | 6             | 0           | 0.405680                | -1.766058 | 0.030618  |
| 5             | 8             | 0           | 1.694963                | -1.543850 | 0.573809  |
| 6             | 6             | 0           | 2.396414                | -0.453502 | -0.030856 |
| 7             | 6             | 0           | 3.766274                | -0.388322 | 0.620124  |
| 8             | 8             | 0           | 0.483262                | -2.081187 | -1.350835 |
| 9             | 1             | 0           | 0.004230                | -2.613244 | 0.598355  |
| 10            | 7             | 0           | -1.815165               | -0.911430 | -0.357711 |
| 11            | 8             | 0           | 4.545433                | -1.501670 | 0.175956  |
| 12            | 8             | 0           | -0.509329               | 1.908309  | 0.056633  |
| 13            | 16            | 0           | -3.237108               | -0.059974 | 0.166757  |
| 14            | 8             | 0           | -4.317626               | -0.800861 | -0.510120 |
| 15            | 8             | 0           | -3.168518               | -0.155748 | 1.639518  |
| 16            | 8             | 0           | -3.094242               | 1.349919  | -0.350390 |
| 17            | 8             | 0           | 2.354183                | 1.846447  | -0.577757 |
| 18            | 6             | 0           | 2.125802                | 3.189623  | -0.181642 |
| 19            | 1             | 0           | 1.573515                | 1.123110  | 1.208683  |
| 20            | 1             | 0           | 0.193166                | 0.658895  | -1.457551 |
| 21            | 1             | 0           | -0.666890               | -0.412210 | 1.274463  |
| 22            | 1             | 0           | 2.531309                | -0.642684 | -1.103785 |
| 23            | 1             | 0           | 4.233905                | 0.563372  | 0.335447  |
| 24            | 1             | 0           | 3.635899                | -0.407596 | 1.713792  |
| 25            | 1             | 0           | 1.052047                | -2.864565 | -1.421129 |
| 26            | 1             | 0           | -1.805376               | -0.938872 | -1.375176 |
| 27            | 1             | 0           | 5.391645                | -1.460462 | 0.645337  |
| 28            | 1             | 0           | -1.486763               | 1.799334  | -0.114216 |
| 29            | 1             | 0           | 2.835926                | 3.802095  | -0.749107 |
| 30            | 1             | 0           | 1.099546                | 3.503931  | -0.386996 |

31 1 0 2.322106 3.326809 0.894974

-----  
SCF Done: E(RB+HF-LYP) = -1330.22082745

Zero-point correction= 0.241206 (Hartree/Particle)  
Thermal correction to Energy= 0.258661  
Thermal correction to Enthalpy= 0.259606  
Thermal correction to Gibbs Free Energy= 0.195399

|                |           |           |           |
|----------------|-----------|-----------|-----------|
| Frequencies -- | 35.6348   | 45.7795   | 60.2293   |
| Frequencies -- | 84.2893   | 92.8330   | 114.2604  |
| Frequencies -- | 128.9038  | 165.0461  | 177.0967  |
| Frequencies -- | 187.7751  | 206.0350  | 228.9745  |
| Frequencies -- | 244.1561  | 257.1081  | 272.7376  |
| Frequencies -- | 332.6098  | 344.1440  | 358.3845  |
| Frequencies -- | 376.4321  | 393.8438  | 410.0133  |
| Frequencies -- | 436.2691  | 457.7069  | 487.1951  |
| Frequencies -- | 523.1181  | 527.5280  | 565.7467  |
| Frequencies -- | 575.0991  | 625.3585  | 636.3530  |
| Frequencies -- | 673.7205  | 786.9871  | 816.4023  |
| Frequencies -- | 824.6439  | 872.1916  | 929.3508  |
| Frequencies -- | 975.6124  | 981.2374  | 1020.0898 |
| Frequencies -- | 1048.7782 | 1062.6801 | 1085.7094 |
| Frequencies -- | 1097.3071 | 1107.1589 | 1131.1612 |
| Frequencies -- | 1134.9869 | 1144.2166 | 1156.5424 |
| Frequencies -- | 1163.7485 | 1176.6152 | 1194.3552 |
| Frequencies -- | 1217.7036 | 1229.5442 | 1237.0874 |
| Frequencies -- | 1258.8212 | 1272.8251 | 1282.0401 |
| Frequencies -- | 1305.7347 | 1336.8140 | 1344.4702 |
| Frequencies -- | 1368.4961 | 1382.6162 | 1394.6831 |
| Frequencies -- | 1409.6853 | 1419.8177 | 1446.2426 |
| Frequencies -- | 1456.2056 | 1477.1044 | 1498.1483 |
| Frequencies -- | 1503.3778 | 1520.6439 | 1541.1492 |
| Frequencies -- | 1551.4414 | 2960.3396 | 2985.8956 |
| Frequencies -- | 2991.6191 | 3003.1353 | 3053.3716 |
| Frequencies -- | 3067.0677 | 3071.4626 | 3082.9285 |
| Frequencies -- | 3095.7065 | 3143.6870 | 3220.9339 |
| Frequencies -- | 3525.0573 | 3734.3150 | 3752.7709 |

GlcNHSO3 anion, 6-sulfate, 4-OMe, alpha anomer, TS to lose 6-sulfate

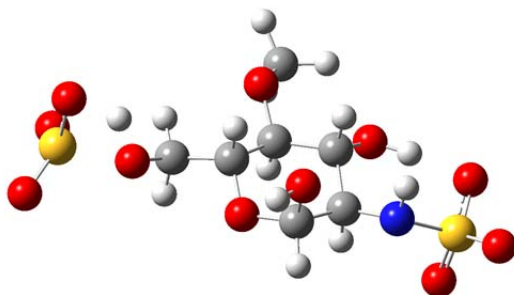

Standard orientation:

| Center Number | Atomic Number | Atomic Type | Coordinates (Angstroms) |           |           |
|---------------|---------------|-------------|-------------------------|-----------|-----------|
|               |               |             | X                       | Y         | Z         |
| 1             | 6             | 0           | -0.006032               | 1.196354  | -0.074301 |
| 2             | 6             | 0           | 1.432342                | 0.864252  | 0.371267  |
| 3             | 6             | 0           | 1.875796                | -0.527933 | -0.165118 |
| 4             | 6             | 0           | 0.794272                | -1.585542 | 0.078194  |
| 5             | 8             | 0           | -0.475522               | -1.181577 | -0.427780 |
| 6             | 6             | 0           | -0.961976               | 0.014452  | 0.166695  |
| 7             | 6             | 0           | -2.323637               | 0.299775  | -0.438146 |
| 8             | 8             | 0           | 0.720470                | -1.845413 | 1.467732  |
| 9             | 1             | 0           | 1.036749                | -2.496093 | -0.478630 |
| 10            | 7             | 0           | 3.127494                | -1.063456 | 0.354937  |
| 11            | 8             | 0           | -3.281244               | -0.684834 | 0.068391  |
| 12            | 8             | 0           | 2.244893                | 1.909855  | -0.104421 |
| 13            | 16            | 0           | 4.636285                | -0.449408 | -0.262142 |
| 14            | 8             | 0           | 5.624998                | -1.318778 | 0.399108  |
| 15            | 8             | 0           | 4.481180                | -0.581520 | -1.724693 |
| 16            | 8             | 0           | 4.719250                | 0.981950  | 0.207081  |
| 17            | 16            | 0           | -5.073812               | -0.395596 | -0.209819 |
| 18            | 8             | 0           | -5.214258               | 0.902649  | -0.850331 |
| 19            | 8             | 0           | -5.626333               | -1.583106 | -0.835250 |
| 20            | 8             | 0           | -5.088050               | -0.388028 | 1.336388  |
| 21            | 8             | 0           | -0.578309               | 2.289176  | 0.640450  |
| 22            | 6             | 0           | -0.157073               | 3.583267  | 0.226026  |
| 23            | 1             | 0           | 0.028697                | 1.426040  | -1.152564 |
| 24            | 1             | 0           | 1.427173                | 0.823886  | 1.475957  |
| 25            | 1             | 0           | 2.002743                | -0.441355 | -1.249798 |
| 26            | 1             | 0           | -1.069753               | -0.114754 | 1.253173  |
| 27            | 1             | 0           | -2.655229               | 1.303304  | -0.169052 |
| 28            | 1             | 0           | -2.298209               | 0.175754  | -1.523014 |
| 29            | 1             | 0           | 0.158502                | -2.627754 | 1.582247  |
| 30            | 1             | 0           | 3.160161                | -1.051951 | 1.372280  |

|    |   |   |           |           |           |
|----|---|---|-----------|-----------|-----------|
| 31 | 1 | 0 | 3.204467  | 1.656559  | 0.021424  |
| 32 | 1 | 0 | -0.755655 | 4.296856  | 0.801850  |
| 33 | 1 | 0 | 0.908617  | 3.736504  | 0.409834  |
| 34 | 1 | 0 | -0.352488 | 3.738109  | -0.847170 |
| 35 | 1 | 0 | -3.826537 | -0.531596 | 1.169192  |

-----

SCF Done: E(RB+HF-LYP) = -1954.06513760

Zero-point correction= 0.251908 (Hartree/Particle)  
 Thermal correction to Energy= 0.272973  
 Thermal correction to Enthalpy= 0.273917  
 Thermal correction to Gibbs Free Energy= 0.199164

|                |            |           |           |
|----------------|------------|-----------|-----------|
| Frequencies -- | -1623.6079 | 19.8528   | 25.2582   |
| Frequencies -- | 34.3305    | 45.5840   | 55.8502   |
| Frequencies -- | 67.6739    | 95.6588   | 115.2384  |
| Frequencies -- | 125.0306   | 140.1609  | 154.4892  |
| Frequencies -- | 171.9169   | 185.9037  | 215.4018  |
| Frequencies -- | 233.6743   | 239.1875  | 267.0662  |
| Frequencies -- | 286.6483   | 313.4431  | 331.9748  |
| Frequencies -- | 346.3692   | 373.1781  | 392.8848  |
| Frequencies -- | 402.9627   | 433.5214  | 435.8780  |
| Frequencies -- | 458.2349   | 478.3020  | 487.2618  |
| Frequencies -- | 503.8558   | 525.0778  | 534.8309  |
| Frequencies -- | 569.8826   | 575.3024  | 608.0314  |
| Frequencies -- | 629.0347   | 639.5864  | 676.7177  |
| Frequencies -- | 721.8632   | 788.1071  | 817.2141  |
| Frequencies -- | 825.4831   | 874.9235  | 928.7329  |
| Frequencies -- | 942.6218   | 975.9543  | 980.6629  |
| Frequencies -- | 999.2590   | 1039.0547 | 1051.6675 |
| Frequencies -- | 1066.1680  | 1088.9201 | 1104.8152 |
| Frequencies -- | 1125.4211  | 1134.8419 | 1143.9548 |
| Frequencies -- | 1153.1092  | 1161.7655 | 1173.0516 |
| Frequencies -- | 1181.1896  | 1193.9985 | 1215.2809 |
| Frequencies -- | 1228.8536  | 1232.1801 | 1246.1660 |
| Frequencies -- | 1271.1445  | 1291.7052 | 1301.1255 |
| Frequencies -- | 1334.5614  | 1344.6737 | 1361.1945 |
| Frequencies -- | 1367.7381  | 1375.8440 | 1391.7275 |
| Frequencies -- | 1404.1188  | 1417.5958 | 1430.8370 |
| Frequencies -- | 1447.7970  | 1454.3950 | 1497.2872 |
| Frequencies -- | 1505.7900  | 1519.8075 | 1523.4500 |
| Frequencies -- | 1549.1756  | 2030.8168 | 2957.1422 |
| Frequencies -- | 2992.3639  | 3004.2360 | 3035.5222 |
| Frequencies -- | 3088.9761  | 3096.5556 | 3097.8874 |
| Frequencies -- | 3109.4473  | 3153.2010 | 3180.3062 |
| Frequencies -- | 3181.1262  | 3524.8414 | 3742.1396 |



4,5-ΔHexA, 2S, 1-OMe, carboxylic anion, beta-anomer

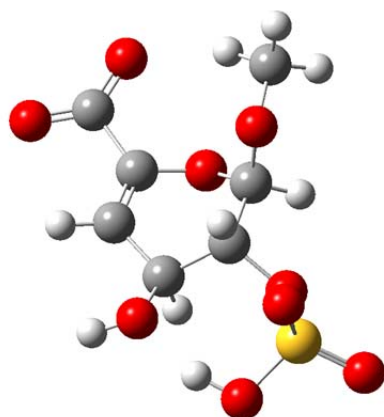

Standard orientation:

| Center Number | Atomic Number | Atomic Type | Coordinates (Angstroms) |           |           |
|---------------|---------------|-------------|-------------------------|-----------|-----------|
|               |               |             | X                       | Y         | Z         |
| 1             | 6             | 0           | -1.385767               | -1.526071 | 0.085131  |
| 2             | 6             | 0           | 0.060757                | -1.312130 | -0.238041 |
| 3             | 6             | 0           | 0.446344                | 0.139045  | 0.058100  |
| 4             | 6             | 0           | -0.650121               | 1.126127  | -0.418606 |
| 5             | 8             | 0           | -1.768913               | 0.494207  | -1.007691 |
| 6             | 6             | 0           | -2.271540               | -0.606825 | -0.316710 |
| 7             | 6             | 0           | -3.796445               | -0.651754 | -0.040927 |
| 8             | 8             | 0           | 1.672635                | 0.517648  | -0.654208 |
| 9             | 8             | 0           | 0.934077                | -2.165126 | 0.555270  |
| 10            | 8             | 0           | -4.208284               | -1.781323 | 0.304198  |
| 11            | 8             | 0           | -4.389772               | 0.445718  | -0.165743 |
| 12            | 16            | 0           | 3.120831                | 0.205439  | 0.021564  |
| 13            | 8             | 0           | 4.089945                | 0.899212  | -0.799630 |
| 14            | 8             | 0           | 3.038708                | 0.429336  | 1.458566  |
| 15            | 8             | 0           | 3.303637                | -1.364452 | -0.274793 |
| 16            | 1             | 0           | 2.501744                | -1.839560 | 0.106949  |
| 17            | 8             | 0           | -1.001269               | 1.881243  | 0.705463  |
| 18            | 6             | 0           | -2.101111               | 2.769813  | 0.468997  |
| 19            | 1             | 0           | -1.731876               | -2.407430 | 0.613717  |
| 20            | 1             | 0           | 0.273124                | -1.501868 | -1.303451 |
| 21            | 1             | 0           | 0.603457                | 0.274350  | 1.129179  |
| 22            | 1             | 0           | -0.247661               | 1.765911  | -1.217038 |
| 23            | 1             | 0           | 0.588376                | -3.069253 | 0.489248  |
| 24            | 1             | 0           | -2.226169               | 3.335026  | 1.396721  |
| 25            | 1             | 0           | -1.863666               | 3.470311  | -0.348509 |
| 26            | 1             | 0           | -3.009447               | 2.204556  | 0.229047  |

SCF Done: E(RB+HF-LYP) = -1347.65423100

Zero-point correction= 0.180731 (Hartree/Particle)  
 Thermal correction to Energy= 0.196756  
 Thermal correction to Enthalpy= 0.197700

Thermal correction to Gibbs Free Energy= 0.136526

|                |           |           |           |
|----------------|-----------|-----------|-----------|
| Frequencies -- | 30.5886   | 51.3470   | 62.8940   |
| Frequencies -- | 104.2490  | 109.0587  | 126.4606  |
| Frequencies -- | 145.1449  | 191.4263  | 214.2141  |
| Frequencies -- | 216.0835  | 238.1890  | 239.9993  |
| Frequencies -- | 275.5343  | 324.9131  | 339.9678  |
| Frequencies -- | 360.9807  | 379.5859  | 391.7612  |
| Frequencies -- | 418.0555  | 435.0370  | 473.4239  |
| Frequencies -- | 501.0509  | 521.4774  | 544.2259  |
| Frequencies -- | 552.2969  | 600.5563  | 641.1236  |
| Frequencies -- | 691.1787  | 747.6673  | 762.3095  |
| Frequencies -- | 793.2993  | 805.3072  | 815.6359  |
| Frequencies -- | 846.2753  | 881.5896  | 946.5161  |
| Frequencies -- | 960.7544  | 1004.9695 | 1028.8690 |
| Frequencies -- | 1066.7410 | 1083.3732 | 1100.8836 |
| Frequencies -- | 1122.2260 | 1143.0971 | 1170.2708 |
| Frequencies -- | 1211.4879 | 1231.5645 | 1243.4432 |
| Frequencies -- | 1264.6643 | 1305.6301 | 1332.2492 |
| Frequencies -- | 1342.2274 | 1357.4355 | 1361.8224 |
| Frequencies -- | 1384.1272 | 1406.9963 | 1432.6510 |
| Frequencies -- | 1474.8929 | 1502.2095 | 1525.7995 |
| Frequencies -- | 1560.5008 | 1704.3638 | 1767.1107 |
| Frequencies -- | 2980.6254 | 2988.3389 | 3032.1685 |
| Frequencies -- | 3083.7118 | 3112.2643 | 3138.4702 |
| Frequencies -- | 3147.5610 | 3227.7107 | 3751.0900 |

4,5-ΔHexA, 1-OMe, carboxylic anion, beta-anomer

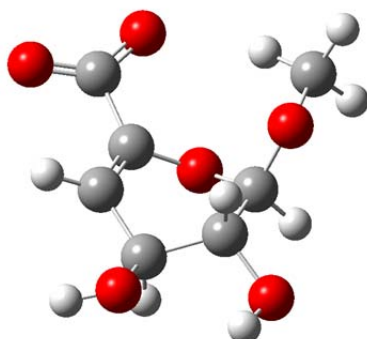

Standard orientation:

| Center Number | Atomic Number | Atomic Type | Coordinates (Angstroms) |           |           |
|---------------|---------------|-------------|-------------------------|-----------|-----------|
|               |               |             | X                       | Y         | Z         |
| 1             | 6             | 0           | -0.104370               | -1.549137 | -0.085382 |
| 2             | 6             | 0           | -1.518225               | -1.154382 | 0.223817  |
| 3             | 6             | 0           | -1.732784               | 0.300933  | -0.192341 |
| 4             | 6             | 0           | -0.600787               | 1.188877  | 0.362619  |
| 5             | 8             | 0           | 0.461415                | 0.457696  | 0.953136  |
| 6             | 6             | 0           | 0.864034                | -0.700710 | 0.284454  |
| 7             | 6             | 0           | 2.378619                | -0.878133 | 0.020460  |
| 8             | 8             | 0           | -2.990816               | 0.795789  | 0.274190  |
| 9             | 8             | 0           | -2.530326               | -1.914647 | -0.464571 |
| 10            | 8             | 0           | 2.700928                | -2.041156 | -0.315658 |
| 11            | 8             | 0           | 3.072336                | 0.161178  | 0.146135  |
| 12            | 8             | 0           | -0.150150               | 1.991698  | -0.699256 |
| 13            | 6             | 0           | 1.014606                | 2.754336  | -0.375462 |
| 14            | 1             | 0           | 0.148558                | -2.468746 | -0.601272 |
| 15            | 1             | 0           | -1.711787               | -1.209570 | 1.311558  |
| 16            | 1             | 0           | -1.685299               | 0.341970  | -1.288733 |
| 17            | 1             | 0           | -0.988740               | 1.813895  | 1.181544  |
| 18            | 1             | 0           | -2.352728               | -2.847478 | -0.270732 |
| 19            | 1             | 0           | 1.221238                | 3.370463  | -1.256521 |
| 20            | 1             | 0           | 0.822825                | 3.418598  | 0.485104  |
| 21            | 1             | 0           | 1.861715                | 2.093886  | -0.154211 |
| 22            | 1             | 0           | -3.629443               | 0.111823  | 0.012449  |

SCF Done: E(RB+HF-LYP) = -723.751899756

Zero-point correction= 0.165245 (Hartree/Particle)  
 Thermal correction to Energy= 0.177830  
 Thermal correction to Enthalpy= 0.178774  
 Thermal correction to Gibbs Free Energy= 0.126273

Frequencies -- 55.8545 64.4889 98.0823  
 Frequencies -- 132.6200 164.9057 192.6520  
 Frequencies -- 212.0326 227.1761 262.7802  
 Frequencies -- 280.0941 308.1701 349.6675

|                |           |           |           |
|----------------|-----------|-----------|-----------|
| Frequencies -- | 378.4525  | 406.0232  | 420.4043  |
| Frequencies -- | 436.4730  | 503.0588  | 541.1918  |
| Frequencies -- | 598.5269  | 615.6263  | 676.0148  |
| Frequencies -- | 750.5357  | 783.6226  | 814.3819  |
| Frequencies -- | 871.4788  | 953.2666  | 990.4776  |
| Frequencies -- | 1023.7098 | 1050.0088 | 1069.1324 |
| Frequencies -- | 1088.1003 | 1106.9329 | 1131.5591 |
| Frequencies -- | 1144.4663 | 1209.5132 | 1220.2118 |
| Frequencies -- | 1242.3831 | 1259.7707 | 1278.2067 |
| Frequencies -- | 1339.7128 | 1351.7796 | 1362.7313 |
| Frequencies -- | 1368.5641 | 1397.5729 | 1433.0279 |
| Frequencies -- | 1455.9313 | 1502.5539 | 1523.4772 |
| Frequencies -- | 1561.7932 | 1698.3735 | 1756.2854 |
| Frequencies -- | 2937.5601 | 2973.6088 | 3014.1821 |
| Frequencies -- | 3046.6213 | 3074.0415 | 3124.8102 |
| Frequencies -- | 3228.0384 | 3721.8872 | 3749.3522 |

4,5-ΔHexA, 2S, 1-OMe, carboxylic anion, beta-anomer, TS to lose 2-sulfate

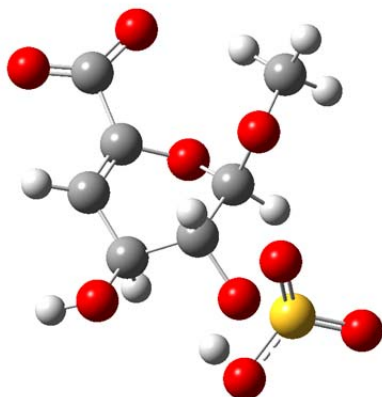

| Center Number | Atomic Number | Atomic Type | Coordinates (Angstroms) |           |           |
|---------------|---------------|-------------|-------------------------|-----------|-----------|
|               |               |             | X                       | Y         | Z         |
| 1             | 6             | 0           | -1.706617               | -1.588275 | 0.091698  |
| 2             | 6             | 0           | -0.283079               | -1.669968 | -0.384621 |
| 3             | 6             | 0           | 0.373240                | -0.332108 | -0.061735 |
| 4             | 6             | 0           | -0.472541               | 0.845256  | -0.594775 |
| 5             | 8             | 0           | -1.751824               | 0.443266  | -1.043000 |
| 6             | 6             | 0           | -2.411644               | -0.502554 | -0.251943 |
| 7             | 6             | 0           | -3.868912               | -0.189279 | 0.169631  |
| 8             | 8             | 0           | 1.695677                | -0.334940 | -0.695140 |
| 9             | 8             | 0           | 0.522193                | -2.674742 | 0.237191  |
| 10            | 8             | 0           | -4.482270               | -1.181689 | 0.621272  |
| 11            | 8             | 0           | -4.216894               | 1.007986  | 0.031971  |
| 12            | 16            | 0           | 3.191506                | 0.267662  | 0.182141  |
| 13            | 8             | 0           | 3.827994                | 1.260212  | -0.667668 |
| 14            | 8             | 0           | 2.817650                | 0.603916  | 1.545635  |
| 15            | 8             | 0           | 3.646131                | -1.190039 | -0.046102 |
| 16            | 8             | 0           | -0.537987               | 1.779602  | 0.443878  |
| 17            | 6             | 0           | -1.443149               | 2.859595  | 0.182034  |
| 18            | 1             | 0           | -2.155114               | -2.360035 | 0.706356  |
| 19            | 1             | 0           | -0.248731               | -1.799564 | -1.482261 |
| 20            | 1             | 0           | 0.507765                | -0.237817 | 1.017297  |
| 21            | 1             | 0           | 0.004535                | 1.279125  | -1.487473 |
| 22            | 1             | 0           | 0.058641                | -3.518462 | 0.124036  |
| 23            | 1             | 0           | -1.350290               | 3.533822  | 1.037836  |
| 24            | 1             | 0           | -1.149965               | 3.399775  | -0.733282 |
| 25            | 1             | 0           | -2.468838               | 2.484191  | 0.086556  |
| 26            | 1             | 0           | 2.448751                | -1.308202 | -0.509350 |

SCF Done: E(RB+HF-LYP) = -1347.59359171

Range of M.O.s used for correlation: 1 277  
 Zero-point correction= 0.175114 (Hartree/Particle)  
 Thermal correction to Energy= 0.191586

Thermal correction to Enthalpy= 0.192530  
Thermal correction to Gibbs Free Energy= 0.129382

|                |            |           |           |
|----------------|------------|-----------|-----------|
| Frequencies -- | -1639.6665 | 28.9720   | 38.4070   |
| Frequencies -- | 50.1654    | 62.3297   | 98.6121   |
| Frequencies -- | 113.6256   | 143.1581  | 161.8978  |
| Frequencies -- | 181.2494   | 195.3525  | 221.8245  |
| Frequencies -- | 235.7365   | 254.1414  | 271.7352  |
| Frequencies -- | 304.5152   | 339.9225  | 366.8225  |
| Frequencies -- | 405.7454   | 413.6420  | 435.8457  |
| Frequencies -- | 473.5199   | 481.5603  | 504.1982  |
| Frequencies -- | 547.7280   | 590.2330  | 608.9782  |
| Frequencies -- | 624.3612   | 660.8981  | 741.1520  |
| Frequencies -- | 751.0955   | 796.4666  | 814.6791  |
| Frequencies -- | 870.0581   | 935.5601  | 959.2196  |
| Frequencies -- | 991.4436   | 1017.3543 | 1036.2984 |
| Frequencies -- | 1064.2161  | 1077.8224 | 1089.2287 |
| Frequencies -- | 1135.9067  | 1148.0137 | 1152.8069 |
| Frequencies -- | 1211.2705  | 1214.2926 | 1230.4801 |
| Frequencies -- | 1241.6146  | 1263.3309 | 1310.4286 |
| Frequencies -- | 1338.6186  | 1349.2881 | 1362.2419 |
| Frequencies -- | 1366.9940  | 1399.0367 | 1409.9673 |
| Frequencies -- | 1440.1337  | 1503.0876 | 1523.2823 |
| Frequencies -- | 1560.0936  | 1696.9936 | 1765.0075 |
| Frequencies -- | 1983.2946  | 2944.1093 | 2987.6023 |
| Frequencies -- | 3010.4583  | 3084.2526 | 3139.5974 |
| Frequencies -- | 3142.2762  | 3237.7986 | 3754.1870 |

4,5-ΔHexA, 2S anion, 1-OMe, beta-anomer

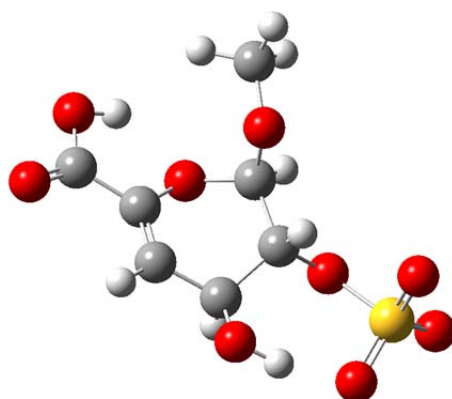

Standard orientation:

| Center Number | Atomic Number | Atomic Type | Coordinates (Angstroms) |           |           |
|---------------|---------------|-------------|-------------------------|-----------|-----------|
|               |               |             | X                       | Y         | Z         |
| 1             | 6             | 0           | -1.375994               | -1.571154 | 0.195203  |
| 2             | 6             | 0           | 0.093240                | -1.403682 | -0.051074 |
| 3             | 6             | 0           | 0.525841                | 0.087153  | 0.104609  |
| 4             | 6             | 0           | -0.581945               | 1.097077  | -0.262526 |
| 5             | 8             | 0           | -1.741629               | 0.492899  | -0.901555 |
| 6             | 6             | 0           | -2.222172               | -0.639586 | -0.251072 |
| 7             | 6             | 0           | -3.704602               | -0.690954 | -0.142990 |
| 8             | 8             | 0           | 1.628874                | 0.392970  | -0.739771 |
| 9             | 8             | 0           | 0.804672                | -2.264858 | 0.801995  |
| 10            | 8             | 0           | -4.333824               | -1.592693 | 0.364261  |
| 11            | 8             | 0           | -4.322277               | 0.392120  | -0.686807 |
| 12            | 16            | 0           | 3.195043                | 0.090064  | -0.093774 |
| 13            | 8             | 0           | 4.033943                | 0.677273  | -1.142631 |
| 14            | 8             | 0           | 3.184392                | 0.764322  | 1.217698  |
| 15            | 8             | 0           | 3.251995                | -1.401152 | -0.009803 |
| 16            | 8             | 0           | -0.966320               | 1.761467  | 0.904273  |
| 17            | 6             | 0           | -1.827707               | 2.867606  | 0.700839  |
| 18            | 1             | 0           | -1.740700               | -2.450204 | 0.713643  |
| 19            | 1             | 0           | 0.282546                | -1.645636 | -1.114832 |
| 20            | 1             | 0           | 0.790269                | 0.256502  | 1.153835  |
| 21            | 1             | 0           | -0.212594               | 1.795326  | -1.020718 |
| 22            | 1             | 0           | 1.762441                | -2.109071 | 0.603606  |
| 23            | 1             | 0           | -1.874784               | 3.405867  | 1.650876  |
| 24            | 1             | 0           | -1.436708               | 3.542121  | -0.076157 |
| 25            | 1             | 0           | -2.842146               | 2.552767  | 0.421983  |
| 26            | 1             | 0           | -3.607592               | 0.953756  | -1.051076 |

SCF Done: E(RB+HF-LYP) = -1347.69953102

Zero-point correction= 0.182517 (Hartree/Particle)  
 Thermal correction to Energy= 0.198328  
 Thermal correction to Enthalpy= 0.199272

Thermal correction to Gibbs Free Energy= 0.137652

|                |           |           |           |
|----------------|-----------|-----------|-----------|
| Frequencies -- | 19.8216   | 38.7676   | 65.1941   |
| Frequencies -- | 97.2432   | 109.4003  | 118.6177  |
| Frequencies -- | 126.7883  | 176.5953  | 199.7846  |
| Frequencies -- | 213.3716  | 227.3270  | 247.7777  |
| Frequencies -- | 263.3926  | 328.9131  | 367.3476  |
| Frequencies -- | 397.1719  | 410.1533  | 421.9522  |
| Frequencies -- | 460.1050  | 479.5057  | 518.3880  |
| Frequencies -- | 541.4020  | 548.1801  | 570.2078  |
| Frequencies -- | 606.0927  | 639.7999  | 665.8975  |
| Frequencies -- | 702.8528  | 714.1096  | 752.9890  |
| Frequencies -- | 774.9959  | 785.2022  | 848.4310  |
| Frequencies -- | 874.8065  | 939.6318  | 984.9832  |
| Frequencies -- | 1001.6270 | 1017.5803 | 1043.2394 |
| Frequencies -- | 1073.3616 | 1095.3446 | 1124.5485 |
| Frequencies -- | 1139.8977 | 1163.1574 | 1190.7219 |
| Frequencies -- | 1207.1783 | 1233.7398 | 1241.9640 |
| Frequencies -- | 1266.2507 | 1291.4060 | 1299.7173 |
| Frequencies -- | 1305.8696 | 1342.6349 | 1360.4444 |
| Frequencies -- | 1400.8303 | 1406.0372 | 1424.8396 |
| Frequencies -- | 1500.6891 | 1521.0492 | 1526.2693 |
| Frequencies -- | 1540.7357 | 1730.3346 | 1853.9029 |
| Frequencies -- | 2933.5490 | 3011.5818 | 3071.7768 |
| Frequencies -- | 3090.2444 | 3092.2964 | 3139.4062 |
| Frequencies -- | 3246.4456 | 3384.2814 | 3605.6200 |



4,5-ΔHexA, 2S anion, 1-OMe, beta-anomer, <sup>0,2</sup>A fragment

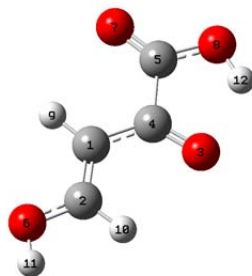

Standard orientation:

| Center Number | Atomic Number | Atomic Type | Coordinates (Angstroms) |           |           |
|---------------|---------------|-------------|-------------------------|-----------|-----------|
|               |               |             | X                       | Y         | Z         |
| 1             | 6             | 0           | -0.927907               | -0.402168 | 0.000096  |
| 2             | 6             | 0           | -2.119475               | 0.231347  | -0.000073 |
| 3             | 8             | 0           | 0.368105                | 1.613804  | -0.000077 |
| 4             | 6             | 0           | 0.287758                | 0.381754  | -0.000007 |
| 5             | 6             | 0           | 1.618696                | -0.406154 | 0.000009  |
| 6             | 8             | 0           | -3.282773               | -0.436746 | 0.000063  |
| 7             | 8             | 0           | 1.688161                | -1.612199 | -0.000121 |
| 8             | 8             | 0           | 2.675275                | 0.413310  | 0.000077  |
| 9             | 1             | 0           | -0.851362               | -1.482825 | 0.000277  |
| 10            | 1             | 0           | -2.163851               | 1.319796  | -0.000197 |
| 11            | 1             | 0           | -4.025514               | 0.186312  | -0.000100 |
| 12            | 1             | 0           | 2.296149                | 1.322687  | 0.000349  |

SCF Done: E(RB+HF-LYP) = -455.859672736

Zero-point correction= 0.082933 (Hartree/Particle)  
 Thermal correction to Energy= 0.090549  
 Thermal correction to Enthalpy= 0.091493  
 Thermal correction to Gibbs Free Energy= 0.050402

|                |           |           |           |
|----------------|-----------|-----------|-----------|
| Frequencies -- | 82.6189   | 140.6346  | 142.2314  |
| Frequencies -- | 238.0239  | 301.2150  | 379.4024  |
| Frequencies -- | 450.0634  | 471.9447  | 483.0937  |
| Frequencies -- | 556.4710  | 711.5331  | 757.1535  |
| Frequencies -- | 807.7015  | 896.7556  | 907.0835  |
| Frequencies -- | 1011.3317 | 1100.4804 | 1187.2493 |
| Frequencies -- | 1225.4763 | 1308.0580 | 1366.2025 |
| Frequencies -- | 1393.8322 | 1452.7178 | 1692.0303 |
| Frequencies -- | 1754.7043 | 1870.8320 | 3184.1825 |
| Frequencies -- | 3249.7718 | 3515.9572 | 3764.7145 |

4,5-ΔHexA, 2S anion, 1-OMe, beta-anomer, <sup>0,2</sup>X fragment

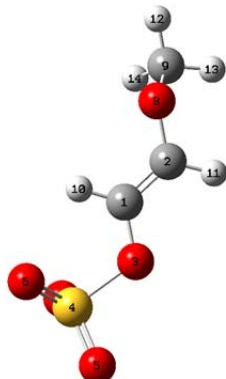

Standard orientation:

| Center Number | Atomic Number | Atomic Type | Coordinates (Angstroms) |           |           |
|---------------|---------------|-------------|-------------------------|-----------|-----------|
|               |               |             | X                       | Y         | Z         |
| 1             | 6             | 0           | 0.786752                | -0.316928 | 0.238869  |
| 2             | 6             | 0           | 2.004502                | -0.630220 | -0.219091 |
| 3             | 8             | 0           | -0.338580               | -0.772604 | -0.354019 |
| 4             | 16            | 0           | -1.813211               | 0.133309  | 0.002239  |
| 5             | 8             | 0           | -2.811566               | -0.859516 | -0.419405 |
| 6             | 8             | 0           | -1.714225               | 0.380686  | 1.456330  |
| 7             | 8             | 0           | -1.684402               | 1.331807  | -0.847374 |
| 8             | 8             | 0           | 3.148018                | -0.268512 | 0.491844  |
| 9             | 6             | 0           | 3.992248                | 0.589860  | -0.246748 |
| 10            | 1             | 0           | 0.657396                | 0.277111  | 1.142186  |
| 11            | 1             | 0           | 2.169017                | -1.217364 | -1.123477 |
| 12            | 1             | 0           | 4.873308                | 0.793234  | 0.373019  |
| 13            | 1             | 0           | 4.324805                | 0.124637  | -1.190810 |
| 14            | 1             | 0           | 3.491878                | 1.538277  | -0.493930 |

SCF Done: E(RB+HF-LYP) = -891.796051304

Zero-point correction= 0.092343 (Hartree/Particle)  
 Thermal correction to Energy= 0.102041  
 Thermal correction to Enthalpy= 0.102985  
 Thermal correction to Gibbs Free Energy= 0.055408

Frequencies -- 32.3191 43.5620 94.8242  
 Frequencies -- 133.5376 207.5217 214.8331  
 Frequencies -- 289.2591 325.1208 354.3552  
 Frequencies -- 466.9604 486.2277 535.5544  
 Frequencies -- 575.1742 581.7677 693.5550  
 Frequencies -- 799.8792 978.3956 1005.7914  
 Frequencies -- 1019.8600 1154.4968 1189.2973  
 Frequencies -- 1217.3582 1238.8130 1254.0906  
 Frequencies -- 1281.0303 1315.8187 1324.3887  
 Frequencies -- 1496.6455 1509.9930 1537.5822  
 Frequencies -- 1738.8286 2977.9765 3033.8578

Frequencies -- 3098.7279

3144.6938

3181.6247

4,5-ΔHexA, 2S anion, 1-OMe, beta-anomer, <sup>0,2</sup>X/A fragmentation TS

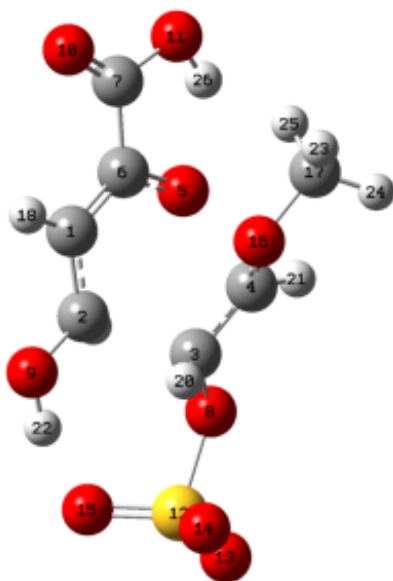

Standard orientation:

| Center Number | Atomic Number | Atomic Type | Coordinates (Angstroms) |           |           |
|---------------|---------------|-------------|-------------------------|-----------|-----------|
|               |               |             | X                       | Y         | Z         |
| 1             | 6             | 0           | 1.362140                | -1.461867 | -0.327724 |
| 2             | 6             | 0           | -0.046332               | -1.352683 | -0.070719 |
| 3             | 6             | 0           | -0.675411               | 0.459821  | -0.260465 |
| 4             | 6             | 0           | 0.368634                | 1.377126  | -0.015458 |
| 5             | 8             | 0           | 1.789242                | 0.196768  | 1.276365  |
| 6             | 6             | 0           | 2.211451                | -0.672944 | 0.408375  |
| 7             | 6             | 0           | 3.708730                | -0.690243 | 0.180258  |
| 8             | 8             | 0           | -1.713077               | 0.581741  | 0.662863  |
| 9             | 8             | 0           | -0.843104               | -2.128541 | -0.852699 |
| 10            | 8             | 0           | 4.322256                | -1.388955 | -0.598339 |
| 11            | 8             | 0           | 4.317192                | 0.206645  | 0.997270  |
| 12            | 16            | 0           | -3.279504               | 0.076254  | 0.129812  |
| 13            | 8             | 0           | -4.123145               | 0.691507  | 1.154755  |
| 14            | 8             | 0           | -3.376705               | 0.604966  | -1.242406 |
| 15            | 8             | 0           | -3.196862               | -1.414850 | 0.202545  |
| 16            | 8             | 0           | 1.205077                | 1.624223  | -1.019605 |
| 17            | 6             | 0           | 2.275980                | 2.533315  | -0.750147 |
| 18            | 1             | 0           | 1.729364                | -2.084183 | -1.135265 |
| 19            | 1             | 0           | -0.325470               | -1.302315 | 0.985824  |
| 20            | 1             | 0           | -0.983442               | 0.374288  | -1.301997 |
| 21            | 1             | 0           | 0.374358                | 2.026321  | 0.852237  |
| 22            | 1             | 0           | -1.777012               | -2.020923 | -0.523986 |
| 23            | 1             | 0           | 2.761269                | 2.722608  | -1.708704 |
| 24            | 1             | 0           | 1.884565                | 3.472895  | -0.341188 |
| 25            | 1             | 0           | 2.984241                | 2.085377  | -0.050402 |
| 26            | 1             | 0           | 3.546059                | 0.562697  | 1.515773  |

SCF Done: E(RB+HF-LYP) = -1347.65524823

|                                          |                             |
|------------------------------------------|-----------------------------|
| Zero-point correction=                   | 0.178555 (Hartree/Particle) |
| Thermal correction to Energy=            | 0.194862                    |
| Thermal correction to Enthalpy=          | 0.195807                    |
| Thermal correction to Gibbs Free Energy= | 0.134037                    |

|                |           |           |           |
|----------------|-----------|-----------|-----------|
| Frequencies -- | -468.2720 | 39.6514   | 48.6942   |
| Frequencies -- | 71.6944   | 94.1771   | 113.4335  |
| Frequencies -- | 122.9956  | 135.5841  | 150.4022  |
| Frequencies -- | 185.7817  | 196.4953  | 220.1478  |
| Frequencies -- | 231.3266  | 253.8735  | 273.1733  |
| Frequencies -- | 316.8437  | 370.1749  | 390.8781  |
| Frequencies -- | 400.3731  | 424.3227  | 444.0497  |
| Frequencies -- | 464.2306  | 505.9320  | 538.5102  |
| Frequencies -- | 544.5026  | 567.2047  | 575.2695  |
| Frequencies -- | 614.7063  | 621.4005  | 706.8620  |
| Frequencies -- | 717.4999  | 784.9824  | 838.0165  |
| Frequencies -- | 874.4471  | 882.0032  | 891.1928  |
| Frequencies -- | 923.3116  | 962.1936  | 987.7372  |
| Frequencies -- | 1030.4199 | 1089.8152 | 1117.7068 |
| Frequencies -- | 1140.4518 | 1172.9637 | 1183.9881 |
| Frequencies -- | 1185.6600 | 1203.7134 | 1208.2949 |
| Frequencies -- | 1249.7223 | 1256.2467 | 1301.3339 |
| Frequencies -- | 1306.5151 | 1331.7766 | 1354.3751 |
| Frequencies -- | 1433.3026 | 1460.9049 | 1485.2506 |
| Frequencies -- | 1515.9621 | 1532.6807 | 1565.5847 |
| Frequencies -- | 1571.3016 | 1637.6010 | 1851.2037 |
| Frequencies -- | 3052.5591 | 3091.7100 | 3144.9490 |
| Frequencies -- | 3157.5786 | 3181.7133 | 3235.8396 |
| Frequencies -- | 3239.4640 | 3272.3759 | 3329.5684 |
